# Supplementary material for: Lewis-acid-promoted cyclization reaction: synthesis of N3-chloroethyl and N3-thiocyanatoethyl quinazolinones
Source: Royal Society of Chemistry journal article supplement (doi:10.1039/d1nj01435h), 2021-01-01

## Supporting Information

# Lewis-Acid-Promoted Cyclization Reaction: Synthesis of N3-Chloroethyl and N3-Thiocyanatoethyl Quinazolinones

Fang-Peng Hu, Ming-Ming Zhang and Guo-Sheng Huang\*

State Key Laboratory of Applied Organic Chemistry, Key Laboratory of Nonferrous Metal Chemistry and Resources Utilization of Gansu Province, Department of Chemistry, Lanzhou University, Lanzhou 730000, China. Fax: 86-931-8912596; E-mail: [hgs@lzu.edu.cn](mailto:hgs@lzu.edu.cn)

### Table of contents

|                                                                                            |    |
|--------------------------------------------------------------------------------------------|----|
| <b>1. General information</b> .....                                                        | 2  |
| <b>2. Experimental section</b> .....                                                       | 2  |
| <b>2.1 General procedure for the synthesis of 2-(4,5-dihydrooxazol-2-yl)anilines</b> ..... | 2  |
| <b>2.2 General procedure for the synthesis of intermediates</b> .....                      | 3  |
| <b>2.2.1 Synthesis of intermediate 5</b> .....                                             | 3  |
| <b>2.2.2 Synthesis of intermediate 6</b> .....                                             | 4  |
| <b>2.2.3 Synthesis of intermediate 7</b> .....                                             | 4  |
| <b>2.2.4 Synthesis of intermediate 8</b> .....                                             | 5  |
| <b>2.3 Optimization of reaction conditions</b> .....                                       | 6  |
| <b>2.3.1 The reaction for the synthesis of N3-chloroethyl quinazolinones</b> .....         | 6  |
| <b>2.3.2 The reaction for the synthesis of N3-thiocyanatoethyl quinazolinones</b> .....    | 7  |
| <b>2.3.3 The ring-opening reaction of amide-oxazoline 5</b> .....                          | 8  |
| <b>2.4 General procedure for synthesis of N3-chloroethyl quinazolinones</b> .....          | 8  |
| <b>2.5 General procedure for synthesis of N3-thiocyanatoethyl quinazolinones</b> .....     | 9  |
| <b>3. Characterization data of products</b> .....                                          | 10 |

## 1. General information

$^1\text{H}$  NMR, and  $^{13}\text{C}$  NMR spectra were recorded on Mercury 400M or 600M in  $\text{CDCl}_3$ . All  $^1\text{H}$  NMR and  $^{13}\text{C}$  NMR chemical shifts were given as  $\delta$  value (ppm) with reference to tetramethylsilane (TMS) as an internal standard. Copies of their  $^1\text{H}$  NMR and  $^{13}\text{C}$  NMR spectra were provided. Products were purified by flash chromatography on 200–300 mesh silica gels. All melting points were determined without correction. All reactions were carried out in oven-dried glassware, unless otherwise noted. Unless otherwise noted, all reagents were obtained from commercial suppliers and used without further purification.

## 2. Experimental section

### 2.1 General procedure for the synthesis of 2-(4,5-dihydrooxazol-2-yl)anilines.<sup>[1]</sup>

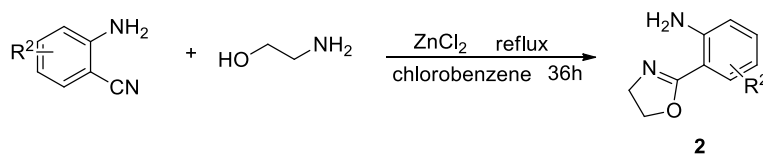

2-aminobenzonitrile (250.0 mmol) and  $\text{ZnCl}_2$  (25.0 mmol) was added to a 500 mL three-necked flask, and then suspended in chlorobenzene (350 mL) under nitrogen. 2-aminoethanol (45 mL, 750.0 mmol) was added to the suspension via a syringe. The mixture was slowly heated to reflux until no gas was produced. After refluxing for 36 hours, the reaction mixture was cooled down to room temperature and the solvent was removed in a rotary

evaporator.  $\text{CH}_2\text{Cl}_2$  (250 mL) was added to the residue and washed with saturated  $\text{NaHCO}_3$  (150 mL) and  $\text{H}_2\text{O}$  (150 mL). The aqueous fraction was extracted with  $\text{CH}_2\text{Cl}_2$  (250 mL  $\times$  3). The combined organic phase was dried over  $\text{Na}_2\text{SO}_4$ , filtered and the solvent was removed in a rotary evaporator. The crude product was recrystallized from EtOAc/Hexane to give colorless crystals of the compound **2** (72%).

## 2.2 General procedure for the synthesis of intermediates.

### 2.2.1 Synthesis of intermediate **5**.<sup>[1]</sup>

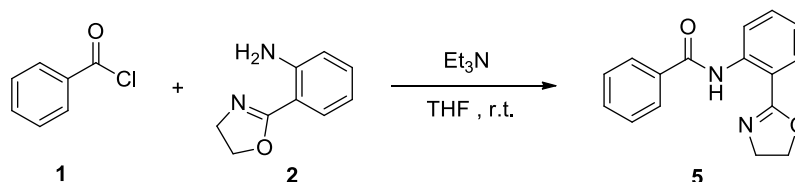

An acid chloride (5.0 mmol), prepared from the corresponding carboxylic acid and oxalyl chloride and 2-(4,5-dihydrooxazol-2-yl)aniline (5.0 mmol) were added to a 50 mL flask and then dissolved with THF (10 mL).  $\text{Et}_3\text{N}$  (7.5 mmol) was taken to the vigorously stirred solution via a syringe. The reaction mixture was stirred at room temperature for 6 h and quenched with saturated  $\text{NaHCO}_3 \cdot \text{H}_2\text{O}$  (100 mL) was added to the mixture and extracted with EtOAc (150 mL  $\times$  3). Combined organic phase was washed with saturated  $\text{NaCl}$  (aq) and dried over  $\text{Na}_2\text{SO}_4$ , and then filtered, the solvent was removed in a rotary evaporator. The crude product was recrystallized from EtOAc/Hexane to give colorless crystals of the product **5** (82%).

### 2.2.2 Synthesis of intermediate 6. [2]

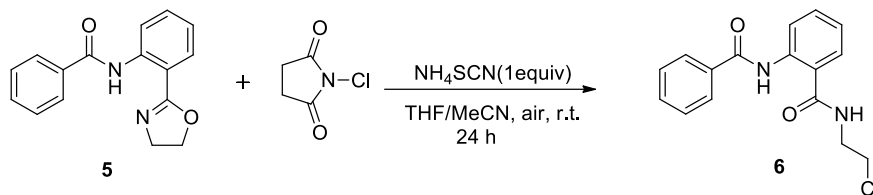

In a Schlenk tube, the corresponding aryl oxazolines **5** (0.2 mmol, 1.0 equiv), NCS (0.4 mmol, 2.0 equiv),  $\text{NH}_4\text{SCN}$  (0.2 mmol, 1.0 equiv) and 2 mL THF/MeCN were added under air atmosphere. The resulting solution was stirred 24h at room temperature. Then the mixture was poured into water (10 mL) and extracted with ethyl acetate (20 mL  $\times$  3), the combined organic layers were dried over anhydrous  $\text{Na}_2\text{SO}_4$ , filtered and the solvent was evaporated under vacuum. The residue was purified by flash chromatography using EtOAc/hexanes (1:4) as eluent to afford the product **6** (96%).

### 2.2.3 Synthesis of intermediate 7.

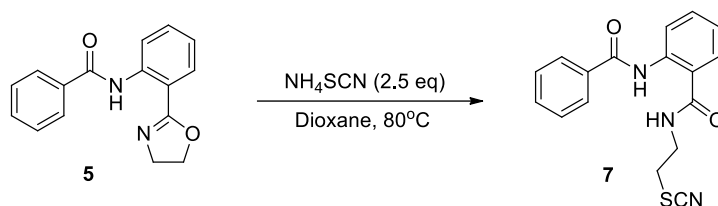

A mixture of **5** (1.0 equiv, 0.10 mmol),  $\text{NH}_4\text{SCN}$  (0.25 mmol), Dioxane (1.0 mL), were stirred at 80 °C under air for 6h (TLC monitored). Upon completion of the reaction, the solvent was evaporated in vacuo and the crude product was purified by column chromatography, eluting with petroleum *n*-hexane/ethyl acetate (4:1) to afford the desired **7** (97%). Liquid in 97% yield;  $^1\text{H}$  NMR (600 MHz,  $\text{CDCl}_3$ )  $\delta$  11.97 (s, 1H), 8.67 (d,

$J = 8.3$  Hz, 1H), 7.99 (d,  $J = 7.3$  Hz, 2H), 7.56 (d,  $J = 7.0$  Hz, 2H), 7.52 (t,  $J = 7.3$  Hz, 2H), 7.48 (t,  $J = 7.7$  Hz, 1H), 7.44 (s, 1H), 7.01 (t,  $J = 7.5$  Hz, 1H), 3.90 – 3.71 (m, 2H), 3.23 (t,  $J = 6.1$  Hz, 2H).  $^{13}\text{C}$  NMR (151 MHz,  $\text{CDCl}_3$ )  $\delta$  169.7, 165.8, 139.7, 134.6, 132.8, 132.0, 128.8, 127.3, 127.1, 123.0, 121.6, 119.8, 111.8, 39.7, 33.1.

#### 2.2.4 Synthesis of intermediate **8**.<sup>[3]</sup>

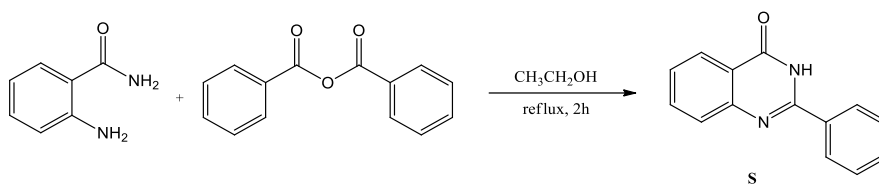

Anthranilamide (36.7 mmol) was coupled with benzoic anhydride (41.1 mmol) in absolute ethanol (30 mL) at reflux for 2h. The reaction mixture was filtered to give a white solid, which was purified from 1 N aqueous NaOH and followed by 2 N aqueous HCl to afford **S** (83%) as white crystals.

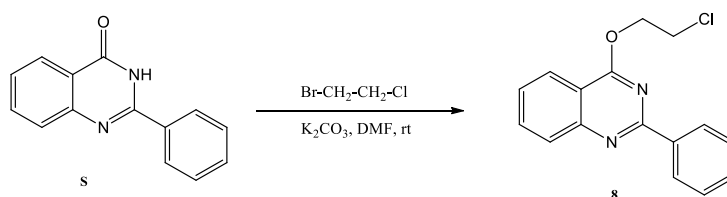

To a stirred mixture of **S** (4.5 mmol) and potassium carbonate (4.5 mmol) in DMF (10 mL) was added dropwise the appropriate bromochloroalkane (6.7 mmol) at room temperature for 24-48 h. The reaction was quenched by water (25 mL) and extracted with ethyl acetate (25 mL  $\times$  2). The combined organic extracts were washed with brine (25 mL  $\times$  3), dried by  $\text{Na}_2\text{SO}_4$ , and evaporated under reduced pressure. The residue was then

purified by column chromatograph over silica gel eluting with ethyl acetate/*n*-hexane = 1/4 to afford the desired **8** (70%).

## 2.3 Optimization of reaction conditions.

### 2.3.1 The reaction for the synthesis of N3-chloroethyl quinazolinones.<sup>a</sup>

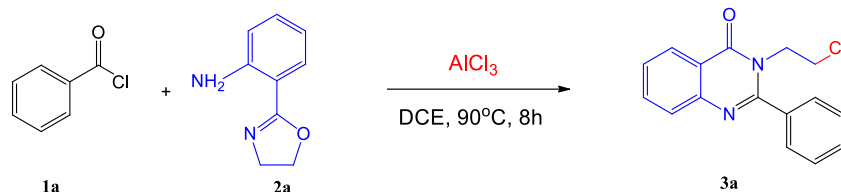

| Entry    | T ( $^\circ\text{C}$ ) | Acid (equiv)                                               | Solvent                           | Yield(%) <sup>b</sup> |
|----------|------------------------|------------------------------------------------------------|-----------------------------------|-----------------------|
| 1        | 120                    | $\text{AlCl}_3$ (2.0)                                      | DCE                               | 62                    |
| 2        | 110                    | $\text{AlCl}_3$ (2.0)                                      | DCE                               | 71                    |
| 3        | 100                    | $\text{AlCl}_3$ (2.0)                                      | DCE                               | 80                    |
| <b>4</b> | <b>90</b>              | <b><math>\text{AlCl}_3</math> (2.0)</b>                    | <b>DCE</b>                        | <b>86</b>             |
| 5        | 80                     | $\text{AlCl}_3$ (2.0)                                      | DCE                               | 65                    |
| 6        | 90                     | $\text{AlCl}_3$ (2.5)                                      | DCE                               | 82                    |
| 7        | 90                     | $\text{AlCl}_3$ (2.0)                                      | DCE                               | 82 <sup>c</sup>       |
| 8        | 90                     | $\text{AlCl}_3$ (2.0)                                      | DCE                               | 84 <sup>d</sup>       |
| 9        | 90                     | $\text{AlCl}_3$ (1.5)                                      | DCE                               | 74                    |
| 10       | 90                     | $\text{FeCl}_3$ (2.0)                                      | DCE                               | 49                    |
| 11       | 90                     | $\text{BF}_3 \cdot \text{O}(\text{C}_2\text{H}_5)_2$ (2.0) | DCE                               | 0                     |
| 12       | 90                     | $\text{BiCl}_3$ (2.0)                                      | DCE                               | Trace                 |
| 13       | 90                     | $\text{CoCl}_2$ (2.0)                                      | DCE                               | Trace                 |
| 14       | 90                     | $\text{NiCl}_2$ (2.0)                                      | DCE                               | 0                     |
| 15       | 90                     | HCl (2.0)                                                  | DCE                               | 0                     |
| 16       | 90                     | $\text{H}_2\text{SO}_4$ (2.0)                              | DCE                               | 0                     |
| 17       | 90                     | TfOH (2.0)                                                 | DCE                               | 0                     |
| 18       | 90                     | $\text{AlCl}_3$ (2.0)                                      | Toluene                           | 49                    |
| 19       | 90                     | $\text{AlCl}_3$ (2.0)                                      | Hexane                            | Trace                 |
| 20       | 90                     | $\text{AlCl}_3$ (2.0)                                      | Dioxane                           | 68                    |
| 21       | 90                     | $\text{AlCl}_3$ (2.0)                                      | THF                               | 39                    |
| 22       | 90                     | $\text{AlCl}_3$ (2.0)                                      | $\text{CF}_3\text{CH}_2\text{OH}$ | 47                    |
| 23       | 90                     | $\text{AlCl}_3$ (2.0)                                      | DMA                               | Trace                 |
| 24       | 90                     | $\text{AlCl}_3$ (2.0)                                      | DMF                               | Trace                 |
| 25       | 90                     | $\text{AlCl}_3$ (2.0)                                      | $\text{CH}_3\text{CN}$            | 56                    |
| 26       | 90                     | $\text{AlCl}_3$ (2.0)                                      | DMSO                              | Trace                 |

<sup>a</sup> Reaction conditions: benzoyl chloride **1a** (0.1 mmol), 2-(4,5-dihydrooxazol-2-yl)aniline **2a** (0.14 mmol) and acid in 1.0 mL solvent at  $90^\circ\text{C}$  for 8 h. <sup>b</sup> isolated yield. <sup>c</sup> 6 h. <sup>d</sup> 10 h.

### 2.3.2 The reaction for the synthesis of N3-thiocyanatoethyl quinazolinones.<sup>a</sup>

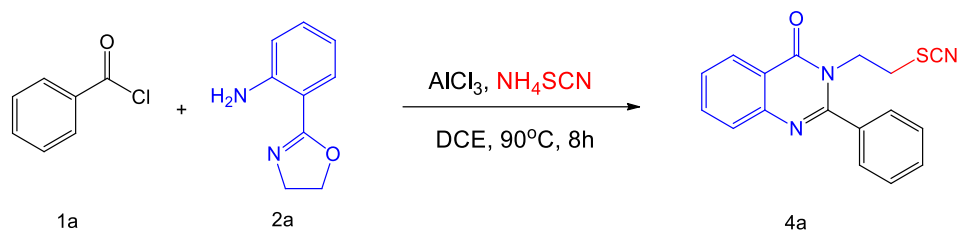

| Entry    | T (°C)    | Acid (equiv)                                                          | Solvent            | [SCN <sup>-</sup> ](equiv)    | Yield(%) <sup>b</sup> |
|----------|-----------|-----------------------------------------------------------------------|--------------------|-------------------------------|-----------------------|
| 1        | 120       | AlCl <sub>3</sub> (2.0)                                               | DCE                | NH <sub>4</sub> SCN(4.0)      | 60                    |
| 2        | 110       | AlCl <sub>3</sub> (2.0)                                               | DCE                | NH <sub>4</sub> SCN(4.0)      | 69                    |
| 3        | 100       | AlCl <sub>3</sub> (2.0)                                               | DCE                | NH <sub>4</sub> SCN(4.0)      | 76                    |
| <b>4</b> | <b>90</b> | <b>AlCl<sub>3</sub> (2.0)</b>                                         | <b>DCE</b>         | <b>NH<sub>4</sub>SCN(4.0)</b> | <b>83</b>             |
| 5        | 80        | AlCl <sub>3</sub> (2.0)                                               | DCE                | NH <sub>4</sub> SCN(4.0)      | 75                    |
| 6        | 90        | AlCl <sub>3</sub> (1.5)                                               | DCE                | NH <sub>4</sub> SCN(4.0)      | 76                    |
| 7        | 90        | AlCl <sub>3</sub> (2.5)                                               | DCE                | NH <sub>4</sub> SCN(4.0)      | 67                    |
| 8        | 90        | AlCl <sub>3</sub> (2.0)                                               | DCE                | NH <sub>4</sub> SCN(4.0)      | 39 <sup>c</sup>       |
| 9        | 90        | AlCl <sub>3</sub> (2.0)                                               | DCE                | NH <sub>4</sub> SCN(4.0)      | 82 <sup>d</sup>       |
| 10       | 90        | AlCl <sub>3</sub> (2.0)                                               | DCE                | NH <sub>4</sub> SCN(2.0)      | 29                    |
| 11       | 90        | AlCl <sub>3</sub> (2.0)                                               | DCE                | NH <sub>4</sub> SCN(3.0)      | 65                    |
| 12       | 90        | FeCl <sub>3</sub> (2.0)                                               | DCE                | NH <sub>4</sub> SCN(4.0)      | 39                    |
| 13       | 90        | BF <sub>3</sub> ·O(C <sub>2</sub> H <sub>5</sub> ) <sub>2</sub> (2.0) | DCE                | NH <sub>4</sub> SCN(4.0)      | Trace                 |
| 14       | 90        | CH <sub>3</sub> COOH (2.0)                                            | DCE                | NH <sub>4</sub> SCN(4.0)      | 0                     |
| 15       | 90        | PivOH (2.0)                                                           | DCE                | NH <sub>4</sub> SCN(4.0)      | 0                     |
| 16       | 90        | HCl (2.0)                                                             | DCE                | NH <sub>4</sub> SCN(4.0)      | 19                    |
| 17       | 90        | H <sub>2</sub> SO <sub>4</sub> (2.0)                                  | DCE                | NH <sub>4</sub> SCN(4.0)      | 28                    |
| 18       | 90        | -                                                                     | DCE                | NH <sub>4</sub> SCN(4.0)      | 0                     |
| 19       | 90        | AlCl <sub>3</sub> (2.0)                                               | THF                | NH <sub>4</sub> SCN(4.0)      | 29                    |
| 20       | 90        | AlCl <sub>3</sub> (2.0)                                               | Toluene            | NH <sub>4</sub> SCN(4.0)      | 32                    |
| 21       | 90        | AlCl <sub>3</sub> (2.0)                                               | CH <sub>3</sub> CN | NH <sub>4</sub> SCN(4.0)      | 19                    |
| 22       | 90        | AlCl <sub>3</sub> (2.0)                                               | Dioxane            | NH <sub>4</sub> SCN(4.0)      | 45                    |
| 23       | 90        | AlCl <sub>3</sub> (2.0)                                               | DMSO               | NH <sub>4</sub> SCN(4.0)      | 0                     |
| 24       | 90        | AlCl <sub>3</sub> (2.0)                                               | DME                | NH <sub>4</sub> SCN(4.0)      | 17                    |
| 25       | 90        | AlCl <sub>3</sub> (2.0)                                               | DMF                | NH <sub>4</sub> SCN(4.0)      | 0                     |
| 26       | 90        | AlCl <sub>3</sub> (2.0)                                               | DCE                | KSCN(4.0)                     | 19                    |
| 27       | 90        | AlCl <sub>3</sub> (2.0)                                               | DCE                | NaSCN(4.0)                    | 35                    |

<sup>a</sup> Reaction conditions: benzoyl chloride **1a** (0.1 mmol), 2-(4,5-dihydrooxazol-2-yl)aniline **2a** (0.14 mmol), acid and [SCN<sup>-</sup>] in 1.0 mL solvent at 90 °C for 8 h. <sup>b</sup> isolated yield. <sup>c</sup> 6 h. <sup>d</sup> 10 h.

### 2.3.3 The ring-opening reaction of amide-oxazoline **5**.<sup>a</sup>

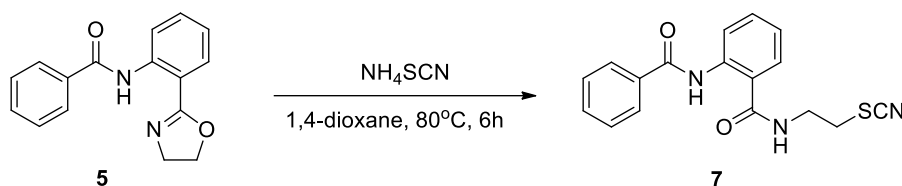

| Entry | Solvent            | T (°C)    | [SCN <sup>-</sup> ] (equiv)    | Yield(%) <sup>b</sup> |
|-------|--------------------|-----------|--------------------------------|-----------------------|
| 1     | Dioxane            | 80        | NH <sub>4</sub> SCN (2.0)      | 89                    |
| 2     | <b>Dioxane</b>     | <b>80</b> | <b>NH<sub>4</sub>SCN (2.5)</b> | <b>97</b>             |
| 3     | Dioxane            | 80        | NH <sub>4</sub> SCN (3.0)      | 92                    |
| 4     | DMSO               | 80        | NH <sub>4</sub> SCN (2.5)      | 0                     |
| 5     | DMF                | 80        | NH <sub>4</sub> SCN (2.5)      | 0                     |
| 6     | CH <sub>3</sub> CN | 80        | NH <sub>4</sub> SCN (2.5)      | 80                    |
| 7     | DCE                | 80        | NH <sub>4</sub> SCN (2.5)      | 65                    |
| 8     | Toluene            | 80        | NH <sub>4</sub> SCN (2.5)      | 29                    |
| 9     | Dioxane            | 60        | NH <sub>4</sub> SCN (2.5)      | 82                    |
| 10    | Dioxane            | 100       | NH <sub>4</sub> SCN (2.5)      | 91                    |

<sup>a</sup> Reaction conditions: amide-oxazoline **5** (0.1 mmol) and NH<sub>4</sub>SCN (0.25 mmol) in 1.0 mL solvent at 80 °C for 6 h. <sup>b</sup> isolated yield.

## 2.4 General procedure for synthesis of N3-chloroethyl quinazolinones.

To a 15 mL sealed tube containing a magnetic stir bar were added benzoyl chlorides **1** (1.0 equiv, 0.1 mmol), 2-(4,5-dihydrooxazol-2-yl)anilines **2** (1.4 equiv, 0.14 mmol) and AlCl<sub>3</sub> (2.0 equiv, 0.2 mmol) in DCE (1.0 mL). After stirred for 8 h at 90 °C, the mixture was concentrated under reduced pressure and purified by silica gel column chromatography (eluent: petroleum ether/ethyl acetate (v/v) = 4:1) to afford N3-chloroethyl quinazolinones **3**.



## 2.5 General procedure for synthesis of N3-thiocyanatoethyl quinazolinones.

To a 15 mL sealed tube containing a magnetic stir bar were added benzoyl chlorides **1** (1.0 equiv, 0.1 mmol), 2-(4,5-dihydrooxazol-2-yl)anilines **2** (1.4 equiv, 0.14 mmol) NH<sub>4</sub>SCN (4.0 equiv, 0.4 mmol), and AlCl<sub>3</sub> (2.0 equiv, 0.2 mmol) in DCE (1.0 mL). After stirred for 8 h at 90 °C, the mixture was concentrated under reduced pressure and purified by silica gel column chromatography (eluent: petroleum ether/ethyl acetate (v/v) = 2:1) to afford N3-thiocyanatoethyl quinazolinones **4**.

[1] M. Shang, S. Z. Sun, H. X. Dai, J. Q. Yu, *J Am Chem Soc.*, **2014**, *136*, 3354-3357.

[2] D. Guan, H. X. Luan, M. Patiguli, Q. J. Jiao, Q. Q. Yun, Q. S. Chen, C. J. Xu, X. B. Nie, F. P. Hu, G. S. Huang, *ChemistrySelect.*, **2019**, *4*, 6668-6671.

[3] G. S. Chen, S. Kalchar, C. W. Kuo, C. S. Chang, C. O. Usifoh, J. W. Chern, *J Org Chem.*, **2003**, *68*, 2502-2505.

### 3 Characterization data of products.

#### 3-(2-chloroethyl)-2-phenylquinazolin-4(3H)-one (3a)

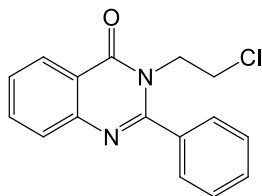

White solid in 86% yield; M.p. =125-128°C; <sup>1</sup>H NMR (400 MHz, CDCl<sub>3</sub>) δ 8.32 (dd, *J* = 7.6, 0.9 Hz, 1H), 7.90 – 7.69 (m, 2H), 7.66 – 7.45 (m, 6H), 4.36 (t, *J* = 6.6 Hz, 2H), 3.74 (t, *J* = 6.6 Hz, 2H). <sup>13</sup>C NMR (101 MHz, CDCl<sub>3</sub>) δ 162.2, 156.0, 147.2, 135.1, 134.8, 130.1, 129.0, 128.2, 127.7, 127.3, 126.8, 120.73, 47.2, 40.4; HRMS (ESI) calcd for C<sub>16</sub>H<sub>13</sub>ClN<sub>2</sub>OH: [M+H]<sup>+</sup> 285.0789, found: 285.0792.

#### 3-(2-chloroethyl)-2-(*p*-tolyl)quinazolin-4(3H)-one (3b)

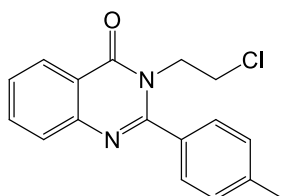

White solid in 82% yield; M.p. =100-103°C; <sup>1</sup>H NMR (400 MHz, CDCl<sub>3</sub>) δ 8.31 (d, *J* = 7.7 Hz, 1H), 7.86 – 7.69 (m, 2H), 7.51 (m, *J* = 8.2, 6.6, 1.7 Hz, 1H), 7.43 (d, *J* = 8.1 Hz, 2H), 7.33 (d, *J* = 8.0 Hz, 2H), 4.38 (t, *J* = 6.6 Hz, 2H), 3.73 (t, *J* = 6.6 Hz, 2H), 2.44 (s, 3H). <sup>13</sup>C NMR (101 MHz, CDCl<sub>3</sub>) δ 162.3, 156.1, 147.2, 140.3, 134.7, 132.2, 129.6, 128.1, 127.7, 127.2, 126.8, 120.6, 47.1, 40.4, 21.5; HRMS (ESI) calcd for C<sub>17</sub>H<sub>15</sub>ClN<sub>2</sub>OH: [M+H]<sup>+</sup> 299.0946, found: 299.0949.

### 3-(2-chloroethyl)-2-(*m*-tolyl)quinazolin-4(3*H*)-one (3c)

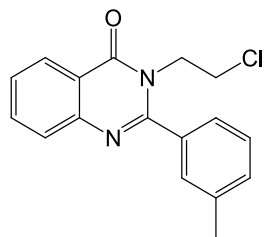

White solid in 85% yield; M.p. =127-129°C; <sup>1</sup>H NMR (400 MHz, CDCl<sub>3</sub>) δ 8.37 – 8.25 (m, 1H), 7.84 – 7.71 (m, 2H), 7.57 – 7.48 (m, 1H), 7.41 (t, *J* = 7.5 Hz, 1H), 7.33 (dd, *J* = 16.3, 4.5 Hz, 3H), 4.36 (t, *J* = 6.6 Hz, 2H), 3.74 (t, *J* = 6.6 Hz, 2H), 2.44 (s, 3H); <sup>13</sup>C NMR (101 MHz, CDCl<sub>3</sub>) δ 162.2, 156.2, 147.2, 139.0, 135.0, 134.7, 130.9, 128.8, 128.8, 127.7, 127.2, 126.8, 125.1, 120.7, 47.2, 40.4, 21.5; HRMS (ESI) calcd for C<sub>17</sub>H<sub>15</sub>ClN<sub>2</sub>OH: [M+H]<sup>+</sup> 299.0946, found:299.0944.

### 3-(2-chloroethyl)-2-(4-ethylphenyl)quinazolin-4(3*H*)-one (3d)

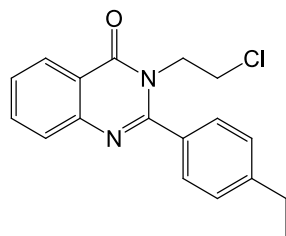

White solid in 80% yield; M.p. =105-107°C; <sup>1</sup>H NMR (400 MHz, CDCl<sub>3</sub>) δ 8.32 (d, *J* = 8.2 Hz, 1H), 7.83 – 7.70 (m, 2H), 7.51 (m, *J* = 8.0, 1.7, 1.0 Hz, 1H), 7.45 (d, *J* = 7.9 Hz, 2H), 7.35 (d, *J* = 8.0 Hz, 2H), 4.39 (t, *J* = 6.6 Hz, 2H), 3.74 (t, *J* = 6.6 Hz, 2H), 2.74 (q, *J* = 7.6 Hz, 2H), 1.42 – 1.19 (m, 3H); <sup>13</sup>C NMR (101 MHz, CDCl<sub>3</sub>) δ 162.3, 156.2, 147.2, 146.6, 134.7, 132.4, 128.5, 128.2, 127.7, 127.2, 126.8, 120.6, 47.2, 40.4, 28.8, 15.4; HRMS (ESI) calcd for C<sub>18</sub>H<sub>17</sub>ClN<sub>2</sub>OH: [M+H]<sup>+</sup> 313.1102, found:313.1103.

### 3-(2-chloroethyl)-2-(4-methoxyphenyl)quinazolin-4(3H)-one (3e)

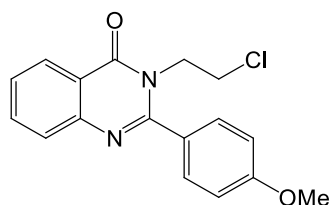

White solid in 84% yield; M.p. =105-108°C;  $^1\text{H}$  NMR (400 MHz,  $\text{CDCl}_3$ )  $\delta$  8.45 – 8.19 (m, 1H), 7.92 – 7.67 (m, 2H), 7.61 – 7.42 (m, 3H), 7.15 – 6.96 (m, 2H), 4.41 (t,  $J = 6.6$  Hz, 2H), 3.88 (s, 3H), 3.74 (t,  $J = 6.6$  Hz, 2H);  $^{13}\text{C}$  NMR (101 MHz,  $\text{CDCl}_3$ )  $\delta$  162.4, 160.9, 155.9, 147.2, 134.7, 129.8, 127.6, 127.5, 127.1, 126.8, 120.6, 114.4, 55.5, 47.2, 40.5; HRMS (ESI) calcd for  $\text{C}_{17}\text{H}_{15}\text{ClN}_2\text{O}_2\text{H}$ :  $[\text{M}+\text{H}]^+$  315.0895, found: 315.0890.

### 3-(2-chloroethyl)-2-(3-fluorophenyl)quinazolin-4(3H)-one (3f)

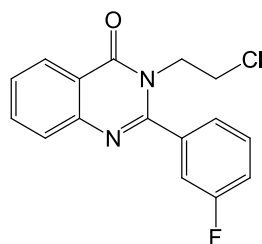

White liquid in 76% yield;  $^1\text{H}$  NMR (400 MHz,  $\text{CDCl}_3$ )  $\delta$  8.32 (dd,  $J = 7.6$ , 1.0 Hz, 1H), 7.84 – 7.76 (m, 1H), 7.76 – 7.71 (m, 1H), 7.58 – 7.45 (m, 2H), 7.38 – 7.28 (m, 2H), 7.27 – 7.20 (m, 1H), 4.36 (t,  $J = 6.4$  Hz, 2H), 3.76 (t,  $J = 6.4$  Hz, 2H);  $^{13}\text{C}$  NMR (101 MHz,  $\text{CDCl}_3$ )  $\delta$  163.9, 162.0, 161.4, 154.6, 147.0, 136.9 (d,  $J = 7.7$  Hz), 134.9, 130.8 (d,  $J = 8.1$  Hz), 127.6 (d,  $J = 13.9$  Hz), 126.8, 124.1 (d,  $J = 3.2$  Hz), 120.7, 117.3 (d,  $J = 21.0$  Hz), 116.0 (d,  $J = 23.4$  Hz), 47.3, 40.4; HRMS (ESI) calcd for  $\text{C}_{16}\text{H}_{12}\text{ClFN}_2\text{OH}$ :  $[\text{M}+\text{H}]^+$  303.0695, found:303.0695.

### 3-(2-chloroethyl)-2-(2-chlorophenyl)quinazolin-4(3H)-one (3g)

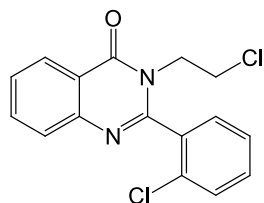

White liquid in 73% yield;  $^1\text{H}$  NMR (400 MHz,  $\text{CDCl}_3$ )  $\delta$  8.35 (dd,  $J = 7.6$ , 1.0 Hz, 1H), 7.85 – 7.73 (m, 2H), 7.63 – 7.58 (m, 1H), 7.55 (m,  $J = 8.6$ , 5.3, 1.5 Hz, 1H), 7.53 – 7.43 (m, 3H), 4.97 – 4.29 (m, 1H), 3.87 (m,  $J = 17.5$ , 11.7, 5.8 Hz, 2H), 3.77 – 3.53 (m, 1H);  $^{13}\text{C}$  NMR (101 MHz,  $\text{CDCl}_3$ )  $\delta$  161.8, 153.3, 147.2, 134.8, 134.0, 132.4, 131.5, 131.0, 129.8, 127.8, 127.6, 127.5, 126.8, 121.0, 47.0, 40.4; HRMS (ESI) calcd for  $\text{C}_{16}\text{H}_{12}\text{Cl}_2\text{N}_2\text{OH}$ :  $[\text{M}+\text{H}]^+$  319.0400, found: 319.0397.

### 3-(2-chloroethyl)-2-(4-chlorophenyl)quinazolin-4(3H)-one (3h)

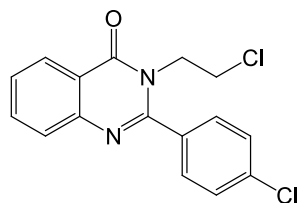

White solid in 77% yield; M.p. = 127-129°C;  $^1\text{H}$  NMR (400 MHz,  $\text{CDCl}_3$ )  $\delta$  8.32 (dd,  $J = 7.8$ , 1.3 Hz, 1H), 7.85 – 7.76 (m, 1H), 7.76 – 7.72 (m, 1H), 7.62 – 7.44 (m, 5H), 4.36 (t,  $J = 6.3$  Hz, 2H), 3.76 (t,  $J = 6.3$  Hz, 2H);  $^{13}\text{C}$  NMR (101 MHz,  $\text{CDCl}_3$ )  $\delta$  162.1, 155.0, 147.0, 136.4, 134.9, 133.5, 129.9, 129.3, 127.7, 127.5, 126.8, 120.7, 47.3, 40.5; HRMS (ESI) calcd for  $\text{C}_{16}\text{H}_{12}\text{Cl}_2\text{N}_2\text{OH}$ :  $[\text{M}+\text{H}]^+$  319.0400, found: 319.0400.

**2-(4-bromophenyl)-3-(2-chloroethyl)quinazolin-4(3H)-one (3i)**

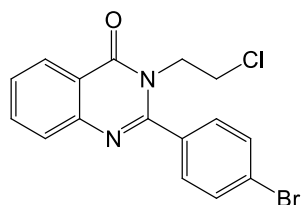

White solid in 71% yield; M.p. =107-109°C; <sup>1</sup>H NMR (400 MHz, CDCl<sub>3</sub>) δ 8.33 (t, *J* = 7.4 Hz, 1H), 7.88 – 7.62 (m, 4H), 7.54 (dd, *J* = 14.7, 7.2 Hz, 1H), 7.44 (dd, *J* = 10.9, 4.4 Hz, 2H), 4.37 (q, *J* = 6.5 Hz, 2H), 3.77 (q, *J* = 6.5 Hz, 2H); <sup>13</sup>C NMR (101 MHz, CDCl<sub>3</sub>) δ 162.1, 155.0, 147.0, 134.9, 134.0, 132.2, 130.1, 127.7, 127.5, 126.8, 124.6, 120.7, 47.3, 40.5; HRMS (ESI) calcd for C<sub>16</sub>H<sub>12</sub>BrClN<sub>2</sub>OH: [M+H]<sup>+</sup> 362.9895, found:362.9899.

**3-(2-chloroethyl)-2-(4-(trifluoromethyl)phenyl)quinazolin-4(3H)-one**

**(3j)**

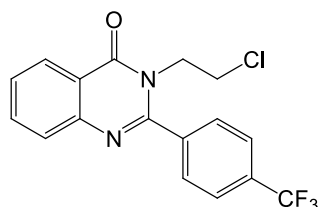

White solid in 60% yield; M.p. =127-129°C; <sup>1</sup>H NMR (400 MHz, CDCl<sub>3</sub>) δ 8.34 (d, *J* = 7.9 Hz, 1H), 8.17 – 8.07 (m, 1H), 7.82 (dd, *J* = 8.1, 7.0 Hz, 1H), 7.76 (d, *J* = 8.0 Hz, 1H), 7.64 (dd, *J* = 3.4, 1.5 Hz, 1H), 7.56 (t, *J* = 7.5 Hz, 1H), 4.35 (t, *J* = 6.2 Hz, 1H), 3.81 (t, *J* = 6.2 Hz, 1H); <sup>13</sup>C NMR (101 MHz, CDCl<sub>3</sub>) δ 162.1, 154.8, 147.0, 144.9, 135.4, 134.9, 130.3, 129.3, 127.7 (d, *J* = 7.3 Hz), 127.1, 126.3 (d, *J* = 103.4 Hz), 120.8, 96.7, 47.4, 40.5; HRMS (ESI) calcd for C<sub>17</sub>H<sub>12</sub>ClF<sub>3</sub>N<sub>2</sub>OH: [M+H]<sup>+</sup> 353.0663, found:353.0664.

### 3-(2-chloroethyl)-2-(3,5-dichlorophenyl)quinazolin-4(3H)-one (3k)

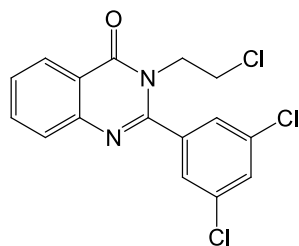

White solid in 68% yield; M.p. =130-132°C;  $^1\text{H}$  NMR (400 MHz,  $\text{CDCl}_3$ )  $\delta$  8.31 (dd,  $J = 8.0, 1.3$  Hz, 1H), 7.87 – 7.77 (m, 1H), 7.73 (d,  $J = 7.5$  Hz, 1H), 7.54 (dt,  $J = 3.7, 1.4$  Hz, 2H), 7.46 (d,  $J = 1.9$  Hz, 2H), 4.36 (t,  $J = 6.1$  Hz, 2H), 3.80 (t,  $J = 6.1$  Hz, 2H);  $^{13}\text{C}$  NMR (101 MHz,  $\text{CDCl}_3$ )  $\delta$  161.8, 153.3, 146.8, 137.6, 135.8, 135.0, 130.3, 127.8, 127.7, 127.1, 126.9, 120.7, 47.4, 40.7; HRMS (ESI) calcd for  $\text{C}_{16}\text{H}_{11}\text{Cl}_3\text{N}_2\text{OH}$ :  $[\text{M}+\text{H}]^+$  353.0010, found:353.0005.

### 3-(2-chloroethyl)-2-(2,3-dichlorophenyl)quinazolin-4(3H)-one (3l)

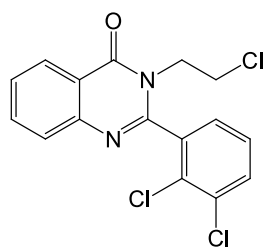

White liquid in 60% yield;  $^1\text{H}$  NMR (400 MHz,  $\text{CDCl}_3$ )  $\delta$  8.35 (dd,  $J = 7.7, 1.1$  Hz, 1H), 7.81 (m,  $J = 8.3, 7.0, 1.4$  Hz, 1H), 7.75 (dd,  $J = 8.1, 0.8$  Hz, 1H), 7.65 (dd,  $J = 8.1, 1.4$  Hz, 1H), 7.61 – 7.55 (m, 1H), 7.53 (dd,  $J = 7.7, 1.4$  Hz, 1H), 7.42 (t,  $J = 7.8$  Hz, 1H), 4.62 (m,  $J = 13.8, 5.8, 3.8$  Hz, 1H), 3.92 (m,  $J = 10.9, 8.5, 5.8$  Hz, 1H), 3.86 – 3.73 (m, 1H), 3.73 – 3.61 (m, 1H);  $^{13}\text{C}$  NMR (101 MHz,  $\text{CDCl}_3$ )  $\delta$  161.7, 152.7, 147.1, 135.9, 134.9,

133.8, 132.1, 131.1, 129.3, 128.4, 128.1, 127.8, 126.9, 121.0, 47.3, 40.5;  
HRMS (ESI) calcd for  $C_{16}H_{11}Cl_3N_2OH$ :  $[M+H]^+$  353.0010,  
found:353.0011.

### 3-(2-chloroethyl)-2-(thiophen-2-yl)quinazolin-4(3H)-one (3m)

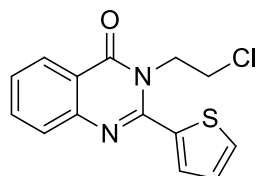

White solid in 85% yield; M.p. =121-124°C;  $^1H$  NMR (600 MHz,  $CDCl_3$ )  
 $\delta$  8.29 (d,  $J = 7.9$  Hz, 1H), 7.80 – 7.75 (m, 1H), 7.74 (d,  $J = 8.0$  Hz, 1H),  
7.57 (d,  $J = 5.1$  Hz, 1H), 7.51 (t,  $J = 7.5$  Hz, 1H), 7.47 (d,  $J = 3.7$  Hz, 1H),  
7.18 (dd,  $J = 5.0, 3.7$  Hz, 1H), 4.58 (t,  $J = 7.0$  Hz, 2H), 3.85 (t,  $J = 7.0$  Hz,  
2H);  $^{13}C$  NMR (151 MHz,  $CDCl_3$ )  $\delta$  162.1, 149.6, 146.9, 136.1, 134.6,  
129.4, 129.2, 127.6, 127.4, 127.3, 126.7, 120.3, 47.0, 40.1; HRMS (ESI)  
calcd for  $C_{14}H_{11}ClN_2OSH$ :  $[M+H]^+$  291.0354, found: 291.0358.

### 3-(2-chloroethyl)-2-(furan-2-yl)quinazolin-4(3H)-one (3n)

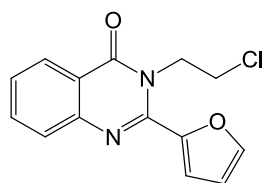

White solid in 90% yield; M.p. =135-137°C;  $^1H$  NMR (400 MHz,  $CDCl_3$ )  
 $\delta$  8.29 (dd,  $J = 8.3, 0.9$  Hz, 1H), 7.82 – 7.69 (m, 2H), 7.66 (d,  $J = 0.8$  Hz,  
1H), 7.56 – 7.40 (m, 1H), 7.23 (d,  $J = 3.6$  Hz, 1H), 6.63 (dd,  $J = 3.3, 1.8$   
Hz, 1H), 4.91 – 4.42 (m, 2H), 4.25 – 3.60 (m, 2H);  $^{13}C$  NMR (101 MHz,  
 $CDCl_3$ )  $\delta$  162.2, 147.6, 147.3, 145.8, 144.8, 135.7, 127.7, 127.4, 126.9,



120.5, 116.0, 112.2, 46.7, 40.5; HRMS (ESI) calcd for C<sub>14</sub>H<sub>11</sub>ClN<sub>2</sub>O<sub>2</sub>H: [M+H]<sup>+</sup> 275.0582, found: 275.0576.

### 3-(2-chloroethyl)-2-(naphthalen-2-yl)quinazolin-4(3H)-one (3o)

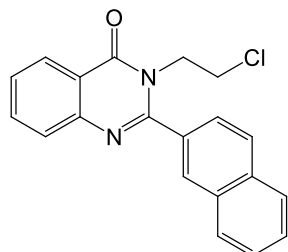

White solid in 85% yield; M.p. =109-111°C; <sup>1</sup>H NMR (400 MHz, CDCl<sub>3</sub>) δ 8.38 – 8.31 (m, 1H), 8.07 (s, 1H), 7.99 (d, *J* = 8.5 Hz, 1H), 7.96 – 7.88 (m, 2H), 7.82 – 7.75 (m, 2H), 7.59 (m, *J* = 5.6, 4.1, 1.8 Hz, 3H), 7.53 m, *J* = 4.5, 4.0, 2.5 Hz, 1H), 4.42 (m, *J* = 6.4, 1.6 Hz, 2H), 3.75 (m, *J* = 6.4, 1.7 Hz, 2H); <sup>13</sup>C NMR (101 MHz, CDCl<sub>3</sub>) δ 162.3, 156.1, 147.2, 134.8, 133.7, 132.9, 132.4, 128.9, 128.6, 128.5, 127.9, 127.7, 127.6, 127.3, 127.2, 126.8, 124.9, 120.7, 47.3, 40.5; HRMS (ESI) calcd for C<sub>20</sub>H<sub>15</sub>ClN<sub>2</sub>OH: [M+H]<sup>+</sup> 335.0946, found:335.0946.

### 3-(2-chloroethyl)-2-ethylquinazolin-4(3H)-one (3p)

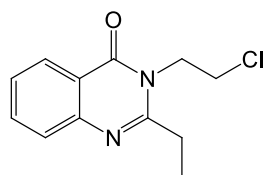

White solid in 67% yield; M.p. =120-122°C; <sup>1</sup>H NMR (400 MHz, CDCl<sub>3</sub>) δ 8.24 (dd, *J* = 8.0, 1.4 Hz, 1H), 7.73 (m, *J* = 8.4, 5.4, 1.5 Hz, 1H), 7.66 (d, *J* = 8.2 Hz, 1H), 7.50 – 7.39 (m, 1H), 4.44 (m, *J* = 6.4, 1.8 Hz, 2H), 4.04 – 3.68 (m, 2H), 2.97 (m, *J* = 7.3, 1.8 Hz, 2H), 1.41 (dd, *J* = 8.4, 6.4 Hz, 3H);

$^{13}\text{C}$  NMR (101 MHz,  $\text{CDCl}_3$ )  $\delta$  162.3, 157.4, 147.3, 134.5, 127.2, 126.6, 126.6, 120.3, 45.2, 40.8, 28.7, 11.4; HRMS (ESI) calcd for  $\text{C}_{12}\text{H}_{13}\text{ClN}_2\text{OH}$ :  $[\text{M}+\text{H}]^+$  237.0789, found: 237.0794.

### 3-(2-chloroethyl)-2-propylquinazolin-4(3H)-one (3q)

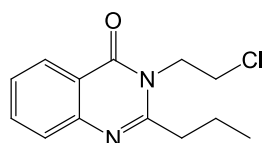

White solid in 59% yield; M.p. = 129-131°C;  $^1\text{H}$  NMR (400 MHz,  $\text{CDCl}_3$ )  $\delta$  8.31 – 8.16 (m, 1H), 7.73 (m,  $J = 8.2, 7.0, 1.3$  Hz, 1H), 7.65 (d,  $J = 8.2$  Hz, 1H), 7.53 – 7.38 (m, 1H), 4.44 (t,  $J = 6.5$  Hz, 2H), 3.88 (t,  $J = 6.5$  Hz, 2H), 3.05 – 2.73 (m, 2H), 1.88 (dd,  $J = 15.2, 7.6$  Hz, 2H), 1.10 (t,  $J = 7.4$  Hz, 3H);  $^{13}\text{C}$  NMR (101 MHz,  $\text{CDCl}_3$ )  $\delta$  162.3, 156.6, 147.3, 134.5, 127.1, 126.6, 126.6, 120.3, 45.4, 40.8, 37.3, 20.7, 13.9; HRMS (ESI) calcd for  $\text{C}_{13}\text{H}_{15}\text{ClN}_2\text{OH}$ :  $[\text{M}+\text{H}]^+$  251.0946, found: 251.0946.

### 6-bromo-3-(2-chloroethyl)-2-phenylquinazolin-4(3H)-one (3r)

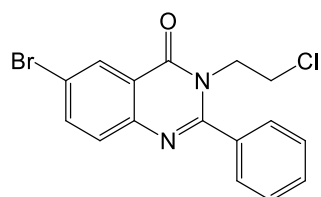

White solid in 85% yield; M.p. = 170-172°C;  $^1\text{H}$  NMR (400 MHz,  $\text{CDCl}_3$ )  $\delta$  8.44 (d,  $J = 2.3$  Hz, 1H), 7.84 (dd,  $J = 8.7, 2.3$  Hz, 1H), 7.61 (d,  $J = 8.7$  Hz, 1H), 7.53 (d,  $J = 6.7$  Hz, 5H), 4.37 (t,  $J = 6.5$  Hz, 2H), 3.72 (t,  $J = 6.5$  Hz, 2H);  $^{13}\text{C}$  NMR (101 MHz,  $\text{CDCl}_3$ )  $\delta$  161.1, 156.4, 146.0, 137.9, 134.8, 130.3, 129.5, 129.3, 129.0, 128.2, 122.0, 120.8, 47.3, 40.3; HRMS (ESI) calcd for  $\text{C}_{16}\text{H}_{12}\text{BrClN}_2\text{OH}$ :  $[\text{M}+\text{H}]^+$  362.9895, found: 362.9899.

### 3-(2-chloroethyl)-5-fluoro-2-phenylquinazolin-4(3H)-one (3s)

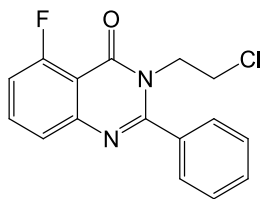

White liquid in 67% yield;  $^1\text{H}$  NMR (400 MHz,  $\text{CDCl}_3$ )  $\delta$  7.70 (m,  $J = 8.2$ , 5.5 Hz, 1H), 7.61 – 7.43 (m, 6H), 7.22 – 7.01 (m, 1H), 4.34 (t,  $J = 6.5$  Hz, 2H), 3.76 (t,  $J = 6.4$  Hz, 2H);  $^{13}\text{C}$  NMR (101 MHz,  $\text{CDCl}_3$ )  $\delta$  162.6, 159.9, 159.3 (d,  $J = 3.9$  Hz), 157.1, 149.1, 135.1 (d,  $J = 10.3$  Hz), 134.8, 130.3, 129.0, 128.2, 123.6, 113.9 (d,  $J = 7.2$  Hz), 113.7 (d,  $J = 7.3$  Hz), 110.4 (d,  $J = 5.8$  Hz), 47.1, 40.3 (d,  $J = 7.7$  Hz); HRMS (ESI) calcd for  $\text{C}_{16}\text{H}_{12}\text{ClFN}_2\text{OH}$ :  $[\text{M}+\text{H}]^+$  303.0695, found: 303.0693.

### 6-chloro-3-(2-chloroethyl)-2-phenylquinazolin-4(3H)-one (3t)

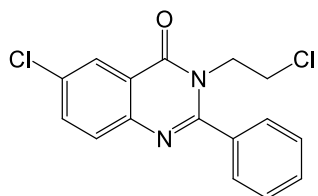

White solid in 84% yield; M.p. = 147-149°C;  $^1\text{H}$  NMR (400 MHz,  $\text{CDCl}_3$ )  $\delta$  8.33 – 8.21 (m, 1H), 7.77 – 7.63 (m, 2H), 7.55 (d,  $J = 15.2$  Hz, 5H), 4.37 (t,  $J = 6.5$  Hz, 2H), 3.72 (t,  $J = 6.5$  Hz, 2H);  $^{13}\text{C}$  NMR (101 MHz,  $\text{CDCl}_3$ )  $\delta$  161.2, 156.3, 145.6, 135.2, 134.8, 133.1, 130.3, 129.4, 129.0, 128.2, 126.1, 121.7, 47.2, 40.4; HRMS (ESI) calcd for  $\text{C}_{16}\text{H}_{12}\text{Cl}_2\text{N}_2\text{OH}$ :  $[\text{M}+\text{H}]^+$  319.0400, found: 319.0406.

### 7-bromo-3-(2-chloroethyl)-2-phenylquinazolin-4(3H)-one (3u)

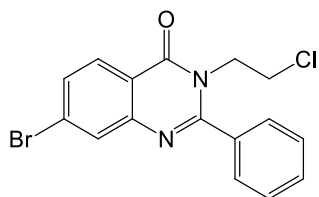

White solid in 81% yield; M.p. =166-168°C;  $^1\text{H}$  NMR (400 MHz,  $\text{CDCl}_3$ )  $\delta$  8.15 (d,  $J = 8.5$  Hz, 1H), 7.92 (d,  $J = 1.8$  Hz, 1H), 7.61 (dd,  $J = 8.5, 1.9$  Hz, 1H), 7.57 – 7.48 (m, 5H), 4.36 (t,  $J = 6.5$  Hz, 2H), 3.72 (t,  $J = 6.5$  Hz, 2H);  $^{13}\text{C}$  NMR (101 MHz,  $\text{CDCl}_3$ )  $\delta$  161.8, 157.3, 148.1, 134.8, 130.7, 130.4, 130.3, 129.5, 129.0, 128.2, 128.2, 119.5, 47.2, 40.3; HRMS (ESI) calcd for  $\text{C}_{16}\text{H}_{12}\text{BrClN}_2\text{O}$ :  $[\text{M}+\text{H}]^+$  362.9895, found: 362.9891.

### 3-(2-chloroethyl)-7-methyl-2-phenylquinazolin-4(3H)-one (3v)

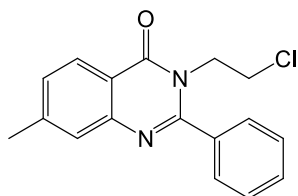

White solid in 79% yield; M.p. =145-147°C;  $^1\text{H}$  NMR (400 MHz,  $\text{CDCl}_3$ )  $\delta$  8.20 (d,  $J = 8.1$  Hz, 1H), 7.60 – 7.50 (m, 6H), 7.34 (d,  $J = 8.1$  Hz, 1H), 4.35 (t,  $J = 6.6$  Hz, 2H), 3.73 (t,  $J = 6.6$  Hz, 2H), 2.50 (s, 3H);  $^{13}\text{C}$  NMR (101 MHz,  $\text{CDCl}_3$ )  $\delta$  162.1, 156.0, 147.3, 145.8, 135.2, 130.0, 128.9, 128.9, 128.2, 127.4, 126.6, 118.3, 47.1, 40.4, 22.0; HRMS (ESI) calcd for  $\text{C}_{17}\text{H}_{15}\text{ClN}_2\text{O}$ :  $[\text{M}+\text{H}]^+$  299.0946, found: 299.0946.

### 3-(3-chloropropyl)-2-phenylquinazolin-4(3H)-one (3w)

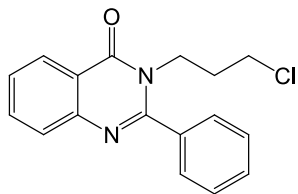

White solid in 87% yield; M.p. =133-135°C; <sup>1</sup>H NMR (400 MHz, CDCl<sub>3</sub>) δ 8.32 (dd, *J* = 8.4, 1.0 Hz, 1H), 7.84 – 7.71 (m, 2H), 7.56 – 7.47 (m, 6H), 4.40 – 3.98 (m, 2H), 3.44 (t, *J* = 6.3 Hz, 2H), 2.48 – 1.97 (m, 2H); <sup>13</sup>C NMR (101 MHz, CDCl<sub>3</sub>) δ 162.3, 156.0, 147.2, 135.2, 134.5, 130.1, 129.0, 127.8, 127.6, 127.2, 126.7, 120.8, 44.0, 42.0, 31.4; HRMS (ESI) calcd for C<sub>17</sub>H<sub>15</sub>ClN<sub>2</sub>OH: [M+H]<sup>+</sup> 299.0946, found.: 299.0940.

### 3-(2-chloroethyl)-2-cyclohexylquinazolin-4(3H)-one (3x)

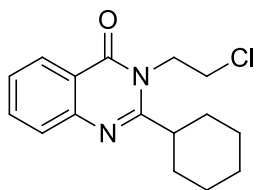

White solid in 71% yield; M.p. =130-131°C; <sup>1</sup>H NMR (600 MHz, CDCl<sub>3</sub>) δ 8.23 (d, *J* = 8.0 Hz, 1H), 7.77 – 7.68 (m, 1H), 7.65 (d, *J* = 8.1 Hz, 1H), 7.48 – 7.37 (m, 1H), 4.47 (t, *J* = 6.4 Hz, 2H), 3.87 (t, *J* = 6.4 Hz, 2H), 2.94 (m, *J* = 11.5, 7.3, 2.9 Hz, 1H), 1.91 (dd, *J* = 14.4, 7.1 Hz, 4H), 1.85 – 1.72 (m, 4H), 1.45 – 1.31 (m, 2H). <sup>13</sup>C NMR (151 MHz, CDCl<sub>3</sub>) δ 162.4, 160.0, 147.4, 134.2, 127.2, 126.5, 126.3, 120.1, 44.4, 42.1, 41.1, 31.3, 26.0, 25.7. HRMS (ESI) calcd for C<sub>16</sub>H<sub>19</sub>ClN<sub>2</sub>OH: [M+H]<sup>+</sup> 291.1259, found.: 291.1253.

### 3-(2-chloroethyl)-2-cyclopropylquinazolin-4(3H)-one (3y)

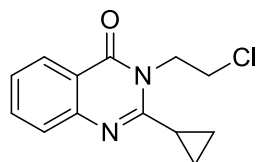

White solid in 54% yield; M.p. =120-121°C;  $^1\text{H}$  NMR (600 MHz,  $\text{CDCl}_3$ )  $\delta$  8.22 (d,  $J = 8.0$  Hz, 1H), 7.69 (t,  $J = 7.6$  Hz, 1H), 7.57 (t,  $J = 6.9$  Hz, 1H), 7.41 (t,  $J = 7.5$  Hz, 1H), 4.67 (t,  $J = 6.8$  Hz, 2H), 3.92 (t,  $J = 6.8$  Hz, 2H), 2.22 – 2.13 (m, 1H), 1.33 – 1.27 (m, 2H), 1.14 – 1.08 (m, 2H).  $^{13}\text{C}$  NMR (151 MHz,  $\text{CDCl}_3$ )  $\delta$  162.2, 156.9, 147.3, 134.2, 126.9, 126.5, 126.2, 120.1, 45.0, 40.6, 14.2, 8.7. HRMS (ESI) calcd for  $\text{C}_{13}\text{H}_{13}\text{ClN}_2\text{O}$ :  $[\text{M}+\text{H}]^+$  249.0789, found: 249.0788.

### 2-phenyl-3-(2-thiocyanatoethyl)quinazolin-4(3H)-one (4a)

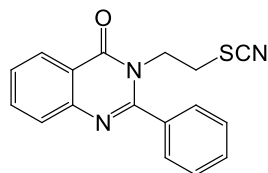

White solid in 83% yield; M.p. =188-190°C;  $^1\text{H}$  NMR (400 MHz,  $\text{CDCl}_3$ )  $\delta$  8.31 (d,  $J = 7.9$  Hz, 1H), 7.91 – 7.70 (m, 2H), 7.65 – 7.50 (m, 6H), 4.42 (dd,  $J = 7.6, 6.6$  Hz, 2H), 3.21 (dd,  $J = 7.5, 6.7$  Hz, 2H);  $^{13}\text{C}$  NMR (101 MHz,  $\text{CDCl}_3$ )  $\delta$  162.3, 155.4, 147.1, 135.0, 134.5, 130.6, 129.4, 127.9, 127.8, 127.5, 126.8, 120.5, 110.5, 45.5, 31.1; HRMS (ESI) calcd for  $\text{C}_{17}\text{H}_{13}\text{N}_3\text{OS}$ :  $[\text{M}+\text{H}]^+$  308.0852, found: 308.0855.

### 3-(2-thiocyanatoethyl)-2-(*m*-tolyl)quinazolin-4(3*H*)-one (4b)

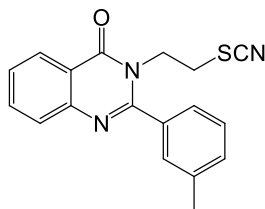

White solid in 72% yield; M.p. =153-156°C; <sup>1</sup>H NMR (400 MHz, CDCl<sub>3</sub>) δ 8.35 – 8.27 (m, 1H), 7.86 – 7.71 (m, 2H), 7.53 (m, *J* = 8.1, 6.6, 1.5 Hz, 1H), 7.45 (t, *J* = 7.5 Hz, 1H), 7.41 – 7.34 (m, 2H), 7.31 (d, *J* = 7.5 Hz, 1H), 4.70 – 4.24 (m, 2H), 3.36 – 3.12 (m, 2H), 2.46 (s, 3H); <sup>13</sup>C NMR (101 MHz, CDCl<sub>3</sub>) δ 162.3, 155.6, 147.1, 139.5, 135.0, 134.4, 131.3, 129.2, 128.4, 127.8, 127.5, 126.7, 124.8, 120.5, 110.5, 45.5, 31.1, 21.6; HRMS (ESI) calcd for C<sub>18</sub>H<sub>15</sub>N<sub>3</sub>OSH: [M+H]<sup>+</sup> 322.1009, found: 322.1009.

### 3-(2-thiocyanatoethyl)-2-(*p*-tolyl)quinazolin-4(3*H*)-one (4c)

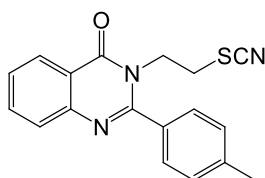

White solid in 75% yield; M.p. =120-123°C; <sup>1</sup>H NMR (400 MHz, CDCl<sub>3</sub>) δ 8.36 – 8.25 (m, 1H), 7.89 – 7.71 (m, 2H), 7.52 (m, *J* = 6.9, 2.4 Hz, 1H), 7.43 (d, *J* = 8.0 Hz, 2H), 7.37 (d, *J* = 7.8 Hz, 2H), 4.92 – 4.25 (m, 2H), 3.34 – 3.07 (m, 2H), 2.45 (s, 3H); <sup>13</sup>C NMR (101 MHz, CDCl<sub>3</sub>) δ 162.3, 155.6, 147.2, 140.9, 134.9, 131.6, 130.0, 129.9, 128.2, 127.3, 126.7, 120.5, 110.6, 45.5, 31.1, 21.5; HRMS (ESI) calcd for C<sub>18</sub>H<sub>15</sub>N<sub>3</sub>OSH: [M+H]<sup>+</sup> 322.1009, found: 322.1014.

## 2-(3,5-dimethylphenyl)-3-(2-thiocyanatoethyl)quinazolin-4(3H)-one

(4d)

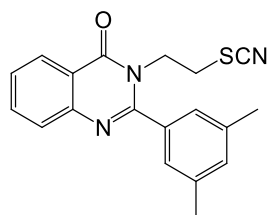

White solid in 73% yield; M.p. =143-147°C;  $^1\text{H}$  NMR (400 MHz,  $\text{CDCl}_3$ )  $\delta$  8.30 (dd,  $J = 8.4, 1.0$  Hz, 1H), 7.85 – 7.72 (m, 2H), 7.62 – 7.48 (m, 1H), 7.19 (s, 1H), 7.12 (s, 2H), 4.75 – 4.18 (m, 2H), 3.42 – 3.07 (m, 2H), 2.41 (s, 6H);  $^{13}\text{C}$  NMR (101 MHz,  $\text{CDCl}_3$ )  $\delta$  162.3, 155.9, 147.1, 139.3, 134.9, 134.3, 132.1, 127.8, 127.4, 126.7, 125.3, 120.5, 110.5, 45.5, 31.1, 21.4; HRMS (ESI) calcd for  $\text{C}_{19}\text{H}_{17}\text{N}_3\text{OSH}$ :  $[\text{M}+\text{H}]^+$  336.1165, found.: 336.1167.

## 2-(4-methoxyphenyl)-3-(2-thiocyanatoethyl)quinazolin-4(3H)-one (4e)

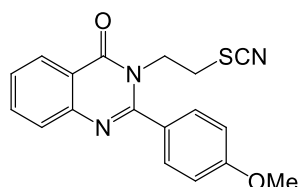

White solid in 76% yield; M.p. =151-153°C;  $^1\text{H}$  NMR (400 MHz,  $\text{CDCl}_3$ )  $\delta$  8.30 (dd,  $J = 7.7, 1.1$  Hz, 1H), 7.93 – 7.67 (m, 2H), 7.63 – 7.38 (m, 3H), 7.18 – 6.99 (m, 2H), 4.46 (dd,  $J = 7.6, 6.6$  Hz, 2H), 3.88 (s, 3H), 3.22 (dd,  $J = 7.7, 6.5$  Hz, 2H);  $^{13}\text{C}$  NMR (101 MHz,  $\text{CDCl}_3$ )  $\delta$  162.4, 161.3, 155.4, 147.2, 134.9, 129.6, 127.7, 127.3, 126.8, 126.7, 120.4, 114.8, 110.6, 55.6, 45.5, 31.2; HRMS (ESI) calcd for  $\text{C}_{18}\text{H}_{15}\text{N}_3\text{O}_2\text{SH}$ :  $[\text{M}+\text{H}]^+$  338.0958, found.: 338.0951.



### 2-(4-ethylphenyl)-3-(2-thiocyanatoethyl)quinazolin-4(3H)-one (4f)

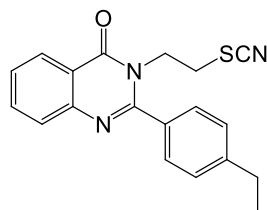

White solid in 82% yield; M.p. =107-109°C; <sup>1</sup>H NMR (400 MHz, CDCl<sub>3</sub>) δ 8.30 (dd, *J* = 7.8, 1.0 Hz, 1H), 7.90 – 7.68 (m, 2H), 7.60 – 7.49 (m, 1H), 7.46 (d, *J* = 8.1 Hz, 2H), 7.39 (d, *J* = 8.1 Hz, 2H), 4.70 – 4.24 (m, 2H), 3.35 – 3.11 (m, 2H), 2.74 (q, *J* = 7.6 Hz, 2H), 1.28 (t, *J* = 7.6 Hz, 3H); <sup>13</sup>C NMR (101 MHz, CDCl<sub>3</sub>) δ 162.3, 155.6, 147.2, 147.1, 134.9, 131.8, 128.8, 127.9, 127.8, 127.4, 126.7, 120.5, 110.6, 45.5, 31.1, 28.9, 15.4; HRMS (ESI) calcd for C<sub>19</sub>H<sub>17</sub>N<sub>3</sub>OSH: [M+H]<sup>+</sup> 336.1165, found: 336.1164.

### 2-(2-fluorophenyl)-3-(2-thiocyanatoethyl)quinazolin-4(3H)-one (4g)

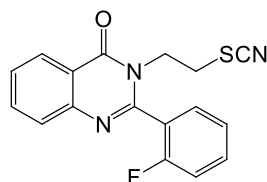

White solid in 63% yield; M.p. =130-132°C; <sup>1</sup>H NMR (400 MHz, CDCl<sub>3</sub>) δ 8.33 (dd, *J* = 7.8, 0.8 Hz, 1H), 7.89 – 7.71 (m, 2H), 7.67 – 7.52 (m, 3H), 7.46 – 7.34 (m, 1H), 7.34 – 7.22 (m, 1H), 4.77 – 4.08 (m, 2H), 3.49 – 3.02 (m, 2H); <sup>13</sup>C NMR (101 MHz, CDCl<sub>3</sub>) δ 161.9, 160.3, 157.8, 150.9, 147.1, 135.0, 132.9, 130.5 (d, *J* = 16.7 Hz), 127.9, 126.8 (d, *J* = 26.3 Hz), 125.5 (d, *J* = 27.1 Hz), 122.6 (d, *J* = 15.9 Hz), 120.8, 117.1, 110.5, 45.7, 30.9; HRMS (ESI) calcd for C<sub>17</sub>H<sub>12</sub>FN<sub>3</sub>OSH: [M+H]<sup>+</sup> 326.0758, found: 326.0755.

### 2-(4-chlorophenyl)-3-(2-thiocyanatoethyl)quinazolin-4(3H)-one (4h)

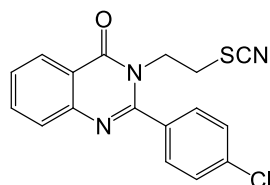

White solid in 61% yield; M.p. =161-164°C; <sup>1</sup>H NMR (400 MHz, CDCl<sub>3</sub>) δ 8.37 – 8.27 (m, 1H), 7.89 – 7.78 (m, 1H), 7.74 (d, *J* = 7.7 Hz, 1H), 7.54 (m, *J* = 18.2, 6.2, 4.5 Hz, 5H), 4.95 – 4.18 (m, 2H), 3.76 – 2.92 (m, 2H); <sup>13</sup>C NMR (101 MHz, CDCl<sub>3</sub>) δ 162.2, 154.3, 147.0, 136.9, 135.1, 132.9, 129.6, 129.4, 127.8, 126.9, 126.7, 120.5, 110.5, 45.6, 31.2; HRMS (ESI) calcd for C<sub>17</sub>H<sub>12</sub>ClN<sub>3</sub>OSH: [M+H]<sup>+</sup> 342.0463, found.: 342.0463.

### 2-(4-bromophenyl)-3-(2-thiocyanatoethyl)quinazolin-4(3H)-one (4i)

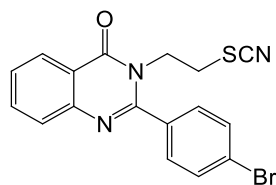

White solid in 61% yield; M.p. =168-170°C; <sup>1</sup>H NMR (400 MHz, CDCl<sub>3</sub>) δ 8.31 (dd, *J* = 7.6, 0.9 Hz, 1H), 7.85 – 7.77 (m, 1H), 7.77 – 7.68 (m, 3H), 7.55 (t, *J* = 7.5 Hz, 1H), 7.49 – 7.37 (m, 2H), 4.64 – 4.09 (m, 2H), 3.50 – 2.91 (m, 2H); <sup>13</sup>C NMR (101 MHz, CDCl<sub>3</sub>) δ 162.2, 154.4, 147.0, 135.1, 133.3, 132.6, 129.8, 129.6, 127.8, 126.9, 125.1, 120.5, 110.5, 45.6, 31.1; HRMS (ESI) calcd for C<sub>17</sub>H<sub>12</sub>BrN<sub>3</sub>OSH: [M+H]<sup>+</sup> 385.9957, found.: 385.9950.

### 3-(2-thiocyanatoethyl)-2-(4-(trifluoromethyl)phenyl)quinazolin-

#### 4(3H)-one (4j)

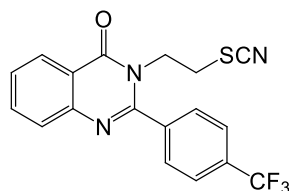

White liquid in 55% yield;  $^1\text{H}$  NMR (400 MHz,  $\text{CDCl}_3$ )  $\delta$  8.33 (dd,  $J = 8.0$ , 0.9 Hz, 1H), 7.89 – 7.80 (m, 3H), 7.76 (dd,  $J = 9.5$ , 5.9 Hz, 3H), 7.61 – 7.54 (m, 1H), 4.40 (t,  $J = 6.8$  Hz, 2H), 3.25 (t,  $J = 6.8$  Hz, 2H);  $^{13}\text{C}$  NMR (101 MHz,  $\text{CDCl}_3$ )  $\delta$  162.1, 153.9, 146.9, 135.2, 132.0 (d,  $J = 33.3$  Hz), 131.3, 130.0, 127.9 (d,  $J = 10.6$  Hz), 127.4, 126.8, 125.3, 123.5 (d,  $J = 272.6$  Hz), 120.6, 110.2, 45.6, 31.2; HRMS (ESI) calcd for  $\text{C}_{18}\text{H}_{12}\text{F}_3\text{N}_3\text{OSH}$ :  $[\text{M}+\text{H}]^+$  376.0726, found: 376.0727.

### 2-(2,3-dichlorophenyl)-3-(2-thiocyanatoethyl)quinazolin-4(3H)-one

#### (4k)

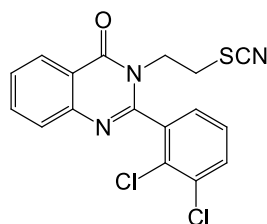

White liquid in 53% yield;  $^1\text{H}$  NMR (400 MHz,  $\text{CDCl}_3$ )  $\delta$  8.34 (dd,  $J = 7.8$ , 1.2 Hz, 1H), 7.89 – 7.79 (m, 1H), 7.76 (d,  $J = 7.4$  Hz, 1H), 7.69 (dd,  $J = 7.6$ , 2.1 Hz, 1H), 7.63 – 7.55 (m, 1H), 7.53 – 7.43 (m, 2H), 4.55 (m,  $J = 13.8$ , 7.9, 4.9 Hz, 1H), 4.09 – 3.82 (m, 1H), 3.44 – 3.09 (m, 2H);  $^{13}\text{C}$  NMR (101 MHz,  $\text{CDCl}_3$ )  $\delta$  161.8, 152.1, 147.0, 135.4, 135.1, 134.4, 132.6, 131.0, 128.8, 128.3, 128.1, 127.9, 126.9, 120.9, 110.5, 45.4, 30.9; HRMS (ESI)

calcd for C<sub>17</sub>H<sub>11</sub>Cl<sub>2</sub>N<sub>3</sub>OSH: [M+H]<sup>+</sup> 376.0073, found: 376.0070.

### 2-propyl-3-(2-thiocyanatoethyl)quinazolin-4(3H)-one (4l)

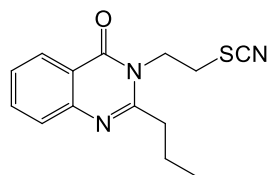

White solid in 82% yield; M.p. =127-129°C; <sup>1</sup>H NMR (400 MHz, CDCl<sub>3</sub>) δ 8.32 – 8.17 (m, 1H), 7.87 – 7.71 (m, 1H), 7.66 (d, *J* = 8.2 Hz, 1H), 7.46 (t, *J* = 7.5 Hz, 1H), 4.60 – 4.42 (m, 2H), 3.34 (dd, *J* = 8.1, 6.5 Hz, 2H), 2.87 (dd, *J* = 9.2, 6.2 Hz, 2H), 1.92 (dd, *J* = 15.2, 7.5 Hz, 2H), 1.13 (t, *J* = 7.4 Hz, 3H); <sup>13</sup>C NMR (101 MHz, CDCl<sub>3</sub>) δ 162.3, 155.9, 147.2, 134.7, 127.2, 126.8, 126.6, 120.1, 111.3, 43.7, 37.2, 31.0, 20.9, 13.8; HRMS (ESI) calcd for C<sub>14</sub>H<sub>15</sub>N<sub>3</sub>OSH: [M+H]<sup>+</sup> 274.1009, found: 274.1014.

### 2-ethyl-3-(2-thiocyanatoethyl)quinazolin-4(3H)-one (4m)

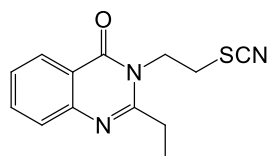

White solid in 83% yield; M.p. =138-141°C; <sup>1</sup>H NMR (400 MHz, CDCl<sub>3</sub>) δ 8.22 (dd, *J* = 7.9, 1.4 Hz, 1H), 7.81 – 7.72 (m, 1H), 7.67 (d, *J* = 7.9 Hz, 1H), 7.50 – 7.40 (m, 1H), 4.49 (dd, *J* = 8.0, 6.5 Hz, 2H), 3.62 – 3.18 (m, 2H), 2.93 (q, *J* = 7.3 Hz, 2H), 1.45 (t, *J* = 7.3 Hz, 3H); <sup>13</sup>C NMR (101 MHz, CDCl<sub>3</sub>) δ 162.3, 156.6, 147.2, 134.7, 127.3, 126.8, 126.6, 120.2, 111.3, 43.5, 31.0, 28.5, 11.4; HRMS (ESI) calcd for C<sub>13</sub>H<sub>13</sub>N<sub>3</sub>OSH: [M+H]<sup>+</sup> 260.0852, found: 260.0852.

### 2-(furan-2-yl)-3-(2-thiocyanatoethyl)quinazolin-4(3H)-one (4n)

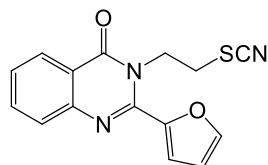

White solid in 80% yield; M.p. =134-136°C;  $^1\text{H}$  NMR (400 MHz,  $\text{CDCl}_3$ )  $\delta$  8.27 (dd,  $J = 8.2, 1.3$  Hz, 1H), 7.76 (m,  $J = 16.6, 15.7, 4.7$  Hz, 3H), 7.50 (m,  $J = 8.1, 7.0, 1.2$  Hz, 1H), 7.37 – 7.30 (m, 1H), 6.64 (dd,  $J = 3.3, 1.8$  Hz, 1H), 4.68 – 4.57 (m, 2H), 3.65 – 3.40 (m, 2H);  $^{13}\text{C}$  NMR (101 MHz,  $\text{CDCl}_3$ )  $\delta$  162.4, 147.4, 147.4, 145.5, 145.2, 134.9, 127.7, 127.4, 126.8, 120.3, 116.8, 112.3, 111.3, 45.9, 31.1; HRMS (ESI) calcd for  $\text{C}_{15}\text{H}_{11}\text{N}_3\text{O}_2\text{SH}$ :  $[\text{M}+\text{H}]^+$  298.0645, found.: 298.0646.

### 3-(2-thiocyanatoethyl)-2-(thiophen-2-yl)quinazolin-4(3H)-one (4o)

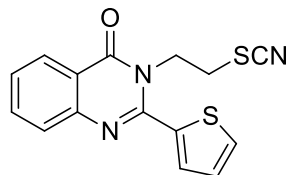

White solid in 57% yield; M.p. =131-133°C;  $^1\text{H}$  NMR (600 MHz,  $\text{CDCl}_3$ )  $\delta$  8.35 – 8.22 (m, 1H), 7.85 – 7.77 (m, 1H), 7.74 (d,  $J = 8.1$  Hz, 1H), 7.63 – 7.58 (m, 1H), 7.52 (dd,  $J = 11.0, 4.0$  Hz, 1H), 7.48 – 7.44 (m, 1H), 7.21 (dd,  $J = 5.0, 3.8$  Hz, 1H), 4.84 – 4.33 (m, 2H), 3.92 – 3.05 (m, 2H).  $^{13}\text{C}$  NMR (151 MHz,  $\text{CDCl}_3$ )  $\delta$  161.2, 148.2, 145.9, 134.3, 133.9, 128.5, 128.4, 126.8, 126.7, 125.8, 119.2, 109.6, 44.6, 29.9. HRMS (ESI) calcd for  $\text{C}_{15}\text{H}_{11}\text{N}_3\text{OS}_2\text{H}$ :  $[\text{M}+\text{H}]^+$  314.0417, found.: 314.0411.

**7-methyl-2-phenyl-3-(2-thiocyanatoethyl)quinazolin-4(3H)-one (4p)**

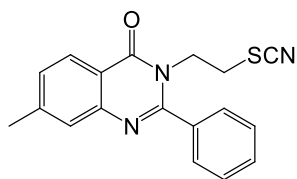

White solid in 65% yield; M.p. =140-143°C; <sup>1</sup>H NMR (400 MHz, CDCl<sub>3</sub>) δ 8.19 (d, *J* = 8.1 Hz, 1H), 7.56 (m, *J* = 6.0, 4.0 Hz, 6H), 7.36 (d, *J* = 8.2 Hz, 1H), 4.40 (t, *J* = 7.1 Hz, 2H), 3.21 (dd, *J* = 7.5, 6.7 Hz, 2H), 2.51 (s, 3H); <sup>13</sup>C NMR (101 MHz, CDCl<sub>3</sub>) δ 162.2, 155.5, 147.2, 146.1, 134.6, 130.5, 129.4, 129.1, 127.9, 127.5, 126.6, 118.1, 110.5, 45.4, 31.1, 22.0; HRMS (ESI) calcd for C<sub>18</sub>H<sub>15</sub>N<sub>3</sub>OSH: [M+H]<sup>+</sup> 322.1009, found: 322.1004.

**6-bromo-2-phenyl-3-(2-thiocyanatoethyl)quinazolin-4(3H)-one (4q)**

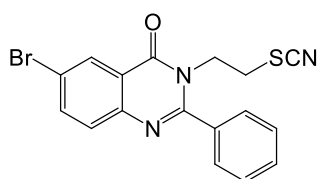

White solid in 84% yield; M.p. =140-143°C; <sup>1</sup>H NMR (400 MHz, CDCl<sub>3</sub>) δ 8.43 (d, *J* = 2.3 Hz, 1H), 7.86 (dd, *J* = 8.7, 2.3 Hz, 1H), 7.68 – 7.49 (m, 6H), 4.77 – 4.29 (m, 2H), 3.57 – 2.71 (m, 2H); <sup>13</sup>C NMR (101 MHz, CDCl<sub>3</sub>) δ 161.1, 155.8, 145.9, 138.2, 134.2, 130.7, 129.6, 129.4, 129.3, 127.9, 121.9, 121.1, 110.4, 45.7, 31.0; HRMS (ESI) calcd for C<sub>17</sub>H<sub>12</sub>BrN<sub>3</sub>OSH: [M+H]<sup>+</sup> 385.9957, found: 385.9959.

**6-chloro-2-phenyl-3-(2-thiocyanatoethyl)quinazolin-4(3H)-one (4r)**

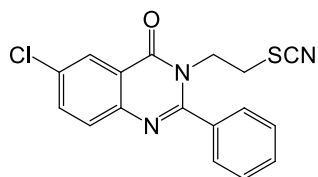

White solid in 83% yield; M.p. =185-188°C;  $^1\text{H}$  NMR (400 MHz,  $\text{CDCl}_3$ )  $\delta$  8.27 (d,  $J = 2.3$  Hz, 1H), 7.80 – 7.65 (m, 2H), 7.66 – 7.49 (m, 5H), 4.69 – 4.25 (m, 2H), 3.57 – 2.96 (m, 2H);  $^{13}\text{C}$  NMR (101 MHz,  $\text{CDCl}_3$ )  $\delta$  161.3, 155.6, 145.6, 135.4, 134.2, 133.4, 130.7, 129.5, 129.4, 127.9, 126.1, 121.5, 110.4, 45.7, 31.0; HRMS (ESI) calcd for  $\text{C}_{17}\text{H}_{12}\text{ClN}_3\text{OSH}$ :  $[\text{M}+\text{H}]^+$  342.0463, found: 342.0457.

**5-fluoro-2-phenyl-3-(2-thiocyanatoethyl)quinazolin-4(3H)-one (4s)**

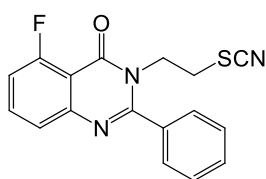

White liquid in 60% yield;  $^1\text{H}$  NMR (400 MHz,  $\text{CDCl}_3$ )  $\delta$  7.72 (m,  $J = 8.2$ , 5.4 Hz, 1H), 7.64 – 7.51 (m, 6H), 7.23 – 7.12 (m, 1H), 4.79 – 4.31 (m, 2H), 3.80 – 3.09 (m, 2H);  $^{13}\text{C}$  NMR (101 MHz,  $\text{CDCl}_3$ )  $\delta$  162.5, 159.6 (d,  $J = 52.3$  Hz), 156.5, 149.0, 135.4 (d,  $J = 10.4$  Hz), 134.1, 130.8, 129.4, 127.8, 123.8 (d,  $J = 4.1$  Hz), 114.0 (d,  $J = 20.8$  Hz), 110.4, 110.3, 45.5, 30.9; HRMS (ESI) calcd for  $\text{C}_{17}\text{H}_{12}\text{FN}_3\text{OSH}$ :  $[\text{M}+\text{H}]^+$  326.0758, found: 326.0759.

### 7-bromo-2-phenyl-3-(2-thiocyanatoethyl)quinazolin-4(3H)-one (4t)

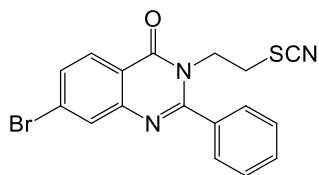

White solid in 75% yield; M.p. =145-148°C;  $^1\text{H}$  NMR (400 MHz,  $\text{CDCl}_3$ )  $\delta$  8.14 (d,  $J = 8.6$  Hz, 1H), 7.93 (d,  $J = 1.8$  Hz, 1H), 7.77 – 7.46 (m, 6H), 4.71 – 4.14 (m, 2H), 3.20 (dd,  $J = 7.6, 6.5$  Hz, 2H);  $^{13}\text{C}$  NMR (101 MHz,  $\text{CDCl}_3$ )  $\delta$  161.8, 156.7, 148.0, 134.2, 130.9, 130.8, 130.6, 129.8, 129.4, 128.2, 127.8, 119.3, 110.4, 45.6, 31.0; HRMS (ESI) calcd for  $\text{C}_{17}\text{H}_{12}\text{BrN}_3\text{OSH}$ :  $[\text{M}+\text{H}]^+$  385.9957, found: 385.9953.

### 2-phenyl-3-(3-thiocyanatopropyl)quinazolin-4(3H)-one (4u)

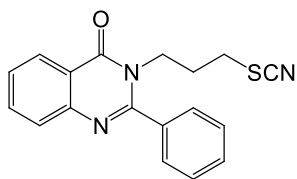

White solid in 85% yield; M.p. =153-155°C;  $^1\text{H}$  NMR (400 MHz,  $\text{CDCl}_3$ )  $\delta$  8.32 (d,  $J = 7.9$  Hz, 1H), 7.89 – 7.68 (m, 2H), 7.62 – 7.39 (m, 6H), 4.56 – 3.72 (m, 2H), 2.88 (t,  $J = 6.9$  Hz, 2H), 2.35 – 2.01 (m, 2H);  $^{13}\text{C}$  NMR (101 MHz,  $\text{CDCl}_3$ )  $\delta$  162.4, 155.7, 147.1, 135.0, 134.7, 130.3, 129.2, 127.7, 127.7, 127.4, 126.8, 120.7, 111.7, 43.8, 31.6, 29.2; HRMS (ESI) calcd for  $\text{C}_{18}\text{H}_{15}\text{N}_3\text{OSH}$ :  $[\text{M}+\text{H}]^+$  322.1009, found: 322.1007.



**2-cyclohexyl-3-(2-thiocyanatoethyl)quinazolin-4(3H)-one (4v)**

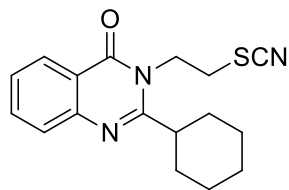

White solid in 61% yield; M.p. =145-147°C; <sup>1</sup>H NMR (600 MHz, CDCl<sub>3</sub>) δ 8.27 – 8.17 (m, 1H), 7.80 – 7.70 (m, 1H), 7.66 (d, *J* = 8.1 Hz, 1H), 7.44 (t, *J* = 7.5 Hz, 1H), 4.64 – 4.27 (m, 2H), 3.55 – 3.14 (m, 2H), 2.84 (tt, *J* = 11.4, 3.0 Hz, 1H), 2.00 – 1.87 (m, 4H), 1.87 – 1.75 (m, 3H), 1.51 (dtd, *J* = 13.2, 9.9, 3.1 Hz, 2H), 1.36 (ddt, *J* = 16.6, 13.1, 6.5 Hz, 1H). <sup>13</sup>C NMR (151 MHz, CDCl<sub>3</sub>) δ 162.4, 159.3, 147.3, 134.4, 127.3, 126.5, 126.4, 120.0, 111.2, 42.7, 42.1, 31.6, 31.4, 25.8, 25.6. HRMS (ESI) calcd for C<sub>17</sub>H<sub>19</sub>N<sub>3</sub>OSH: [M+H]<sup>+</sup> 314.1322, found: 314.1325.

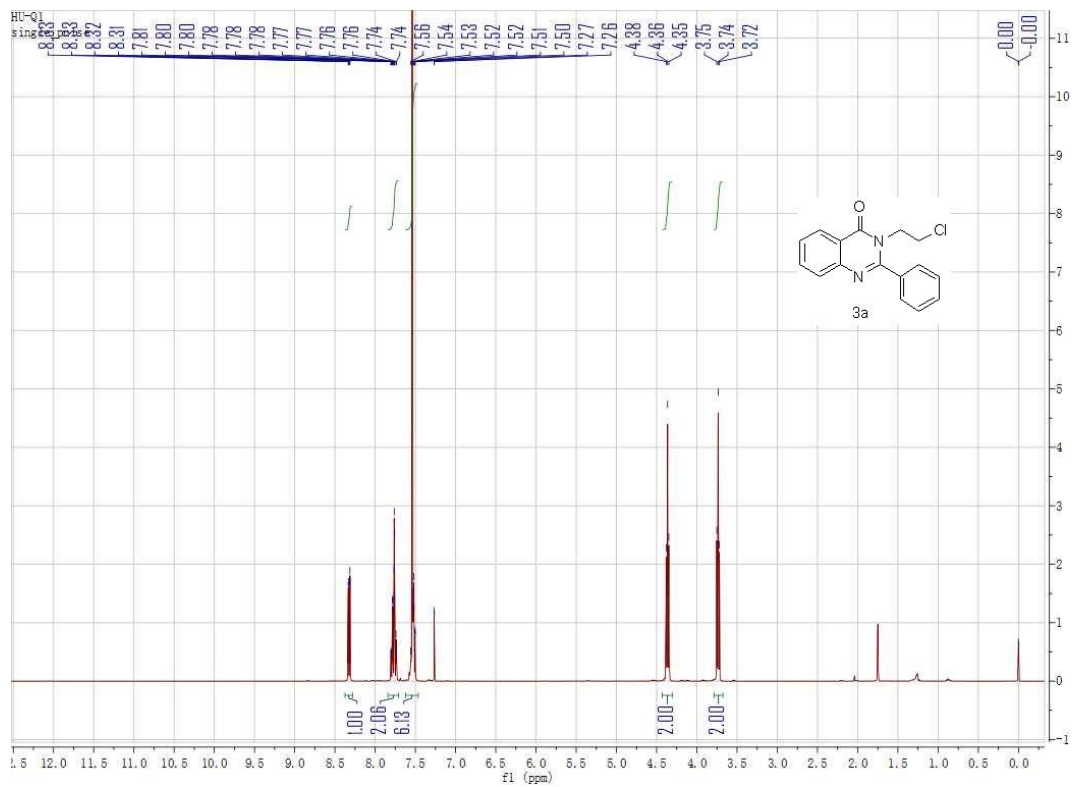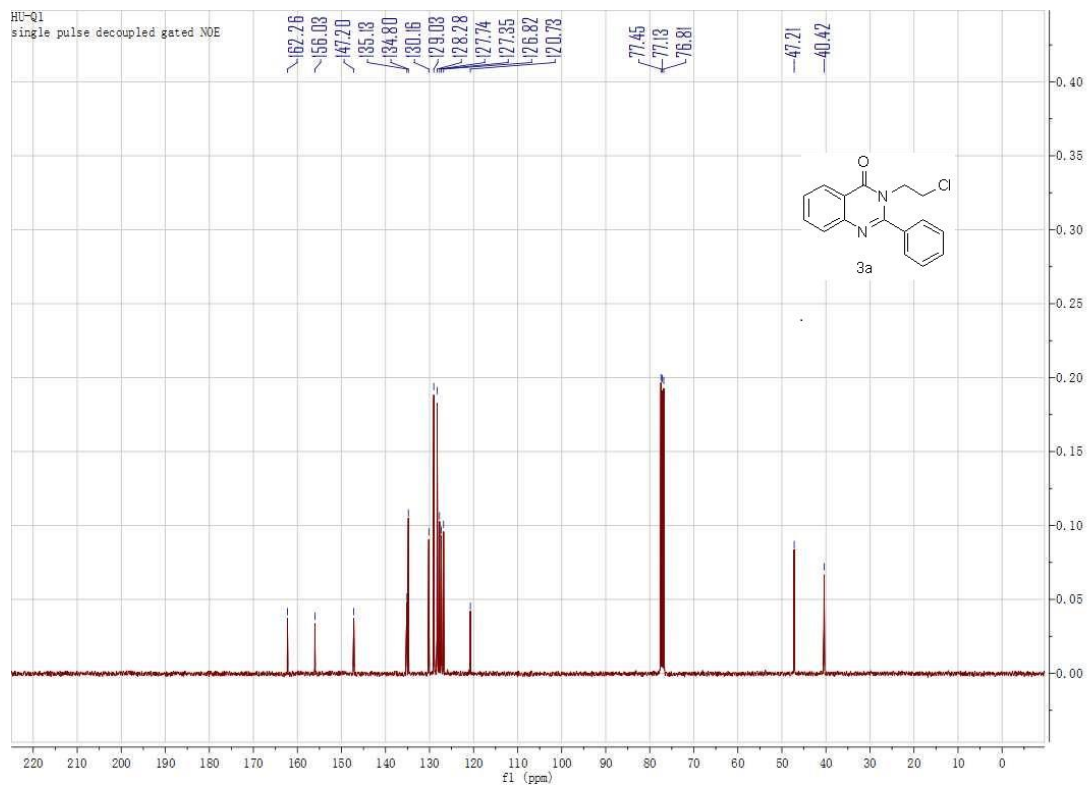

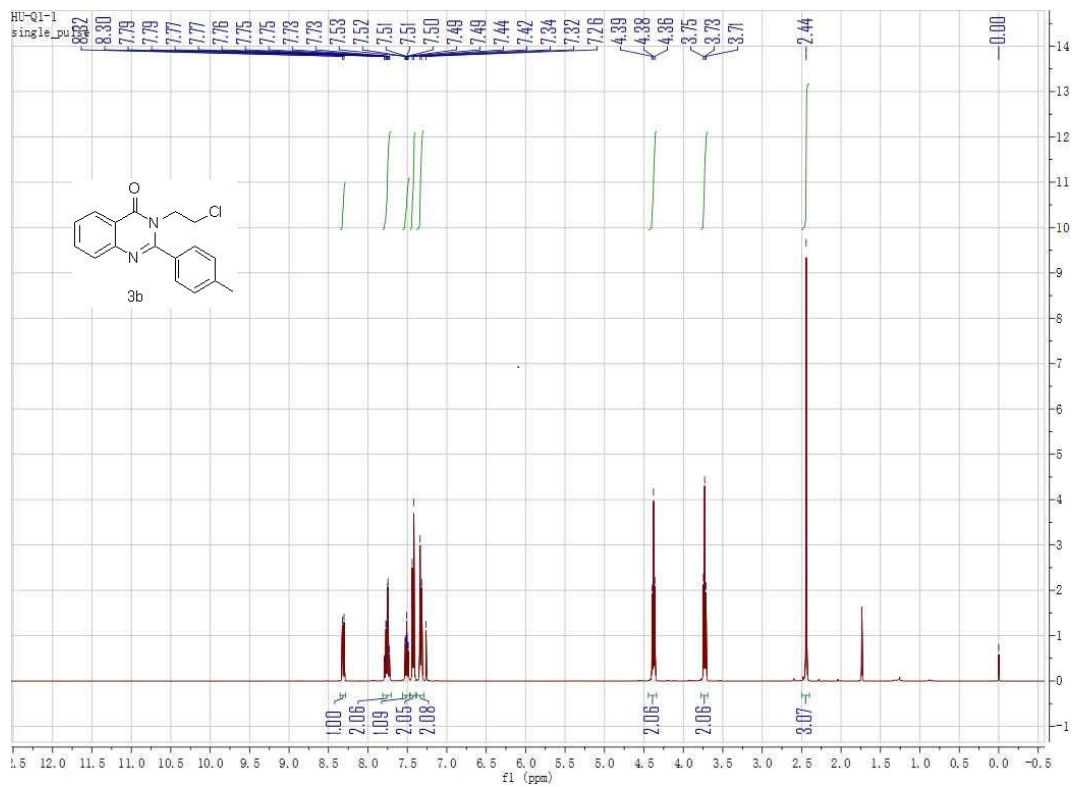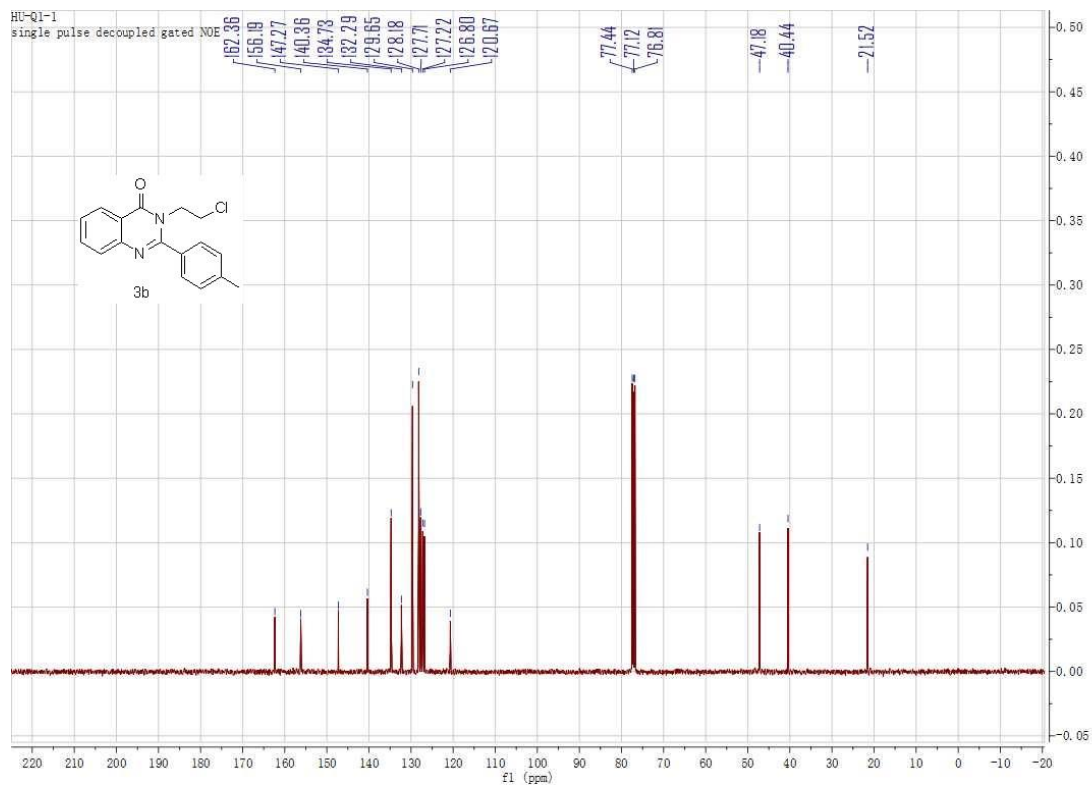

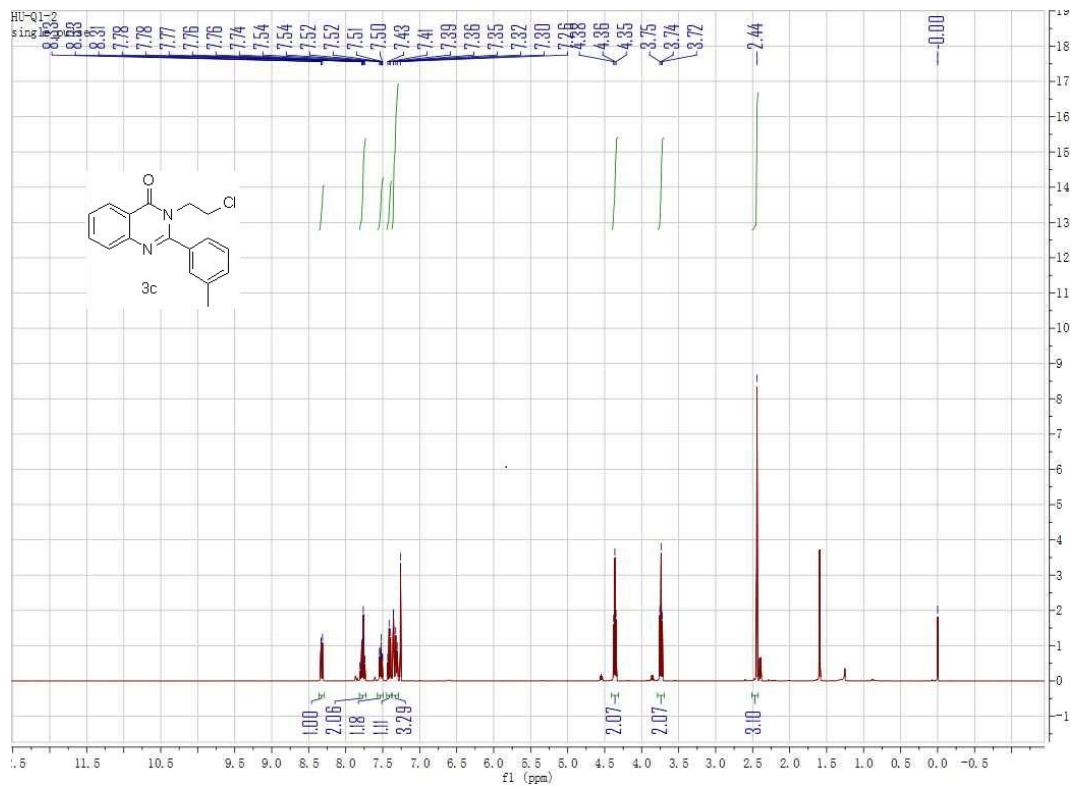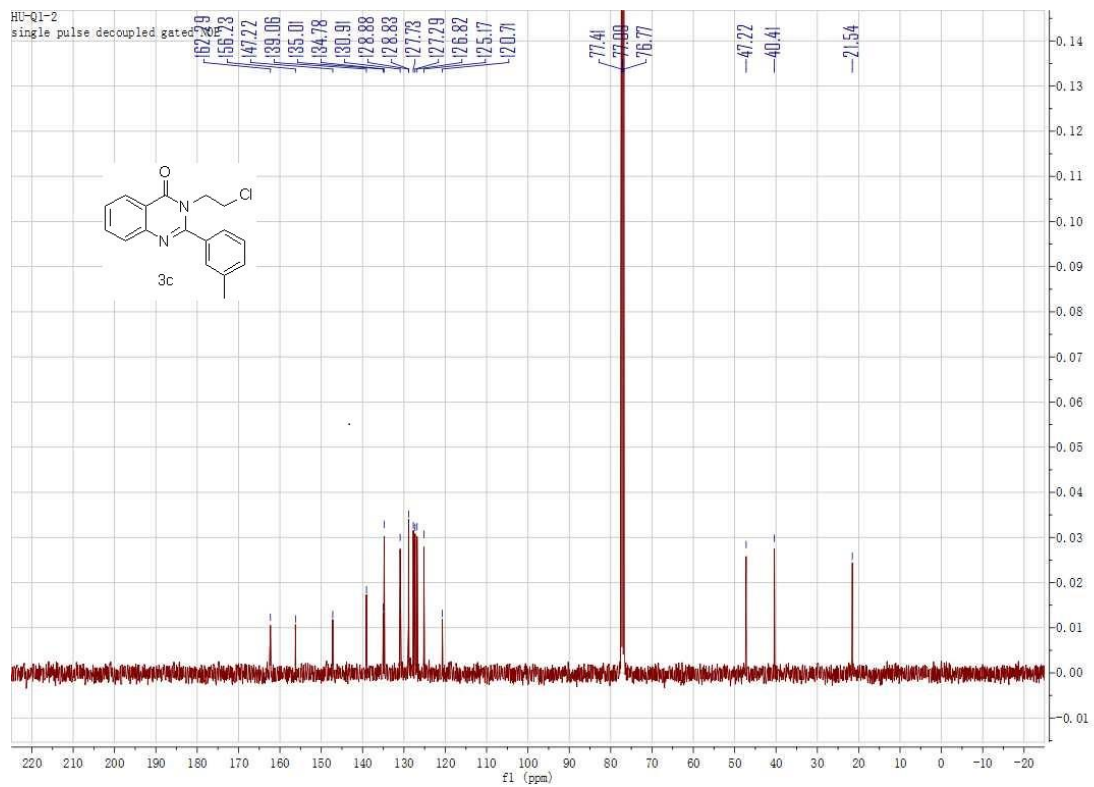

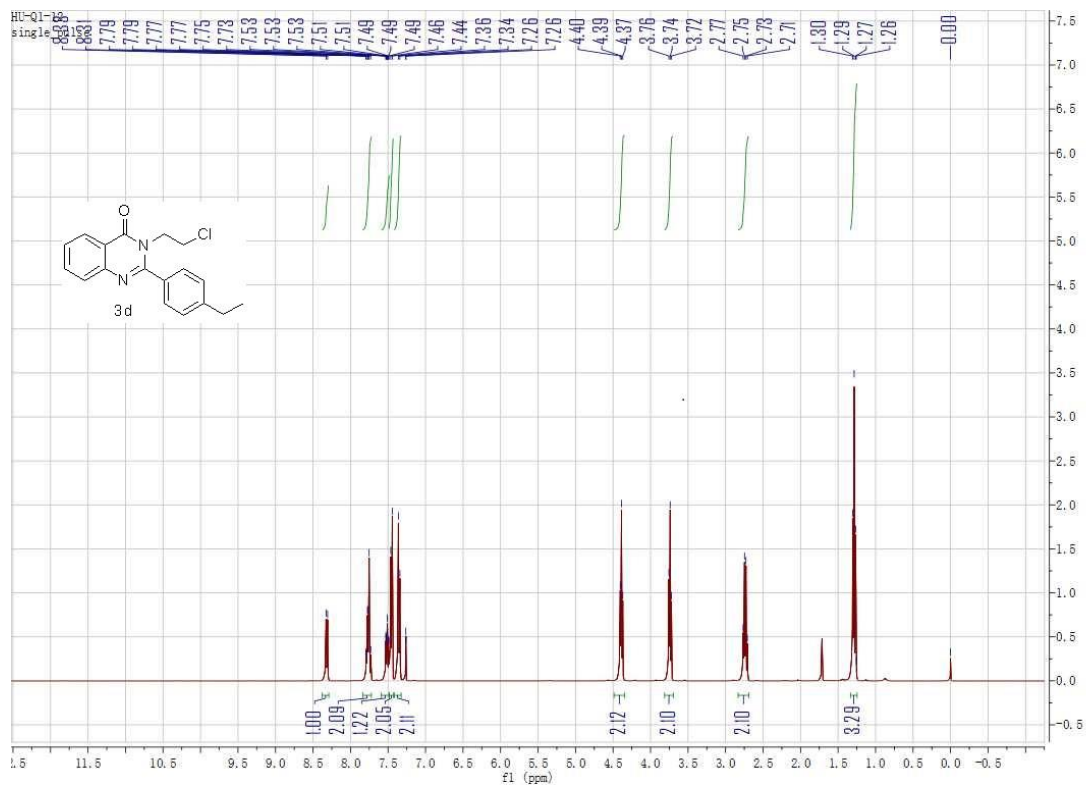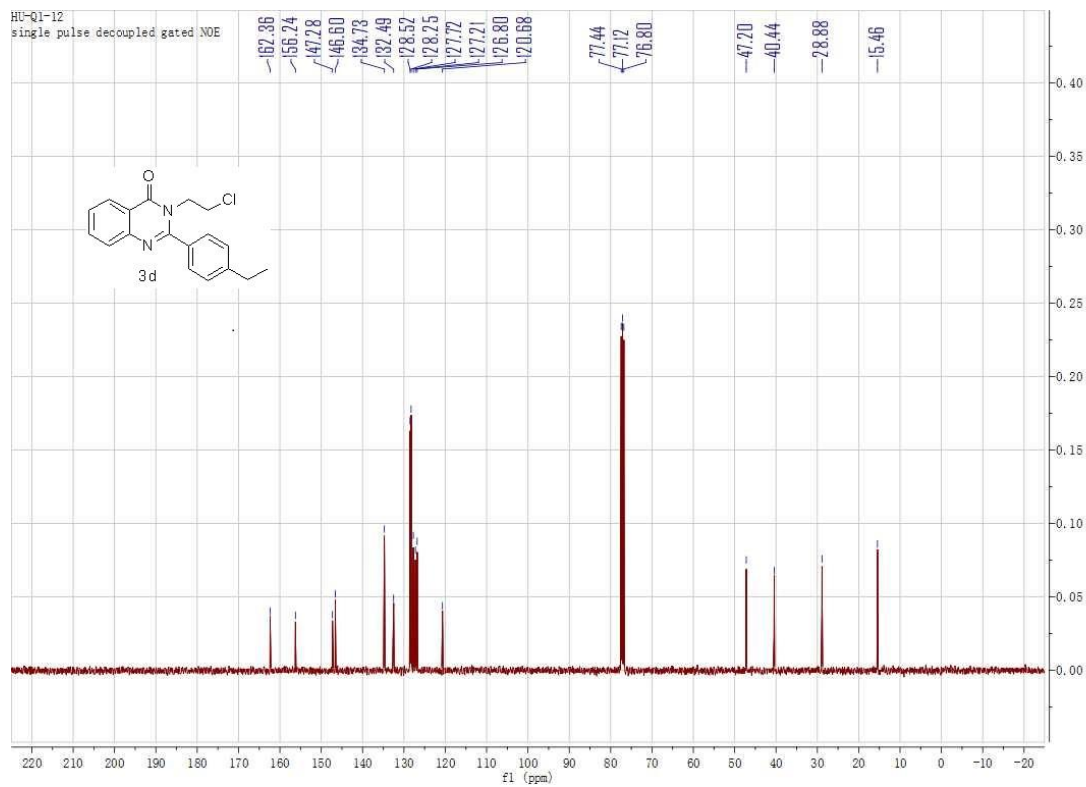

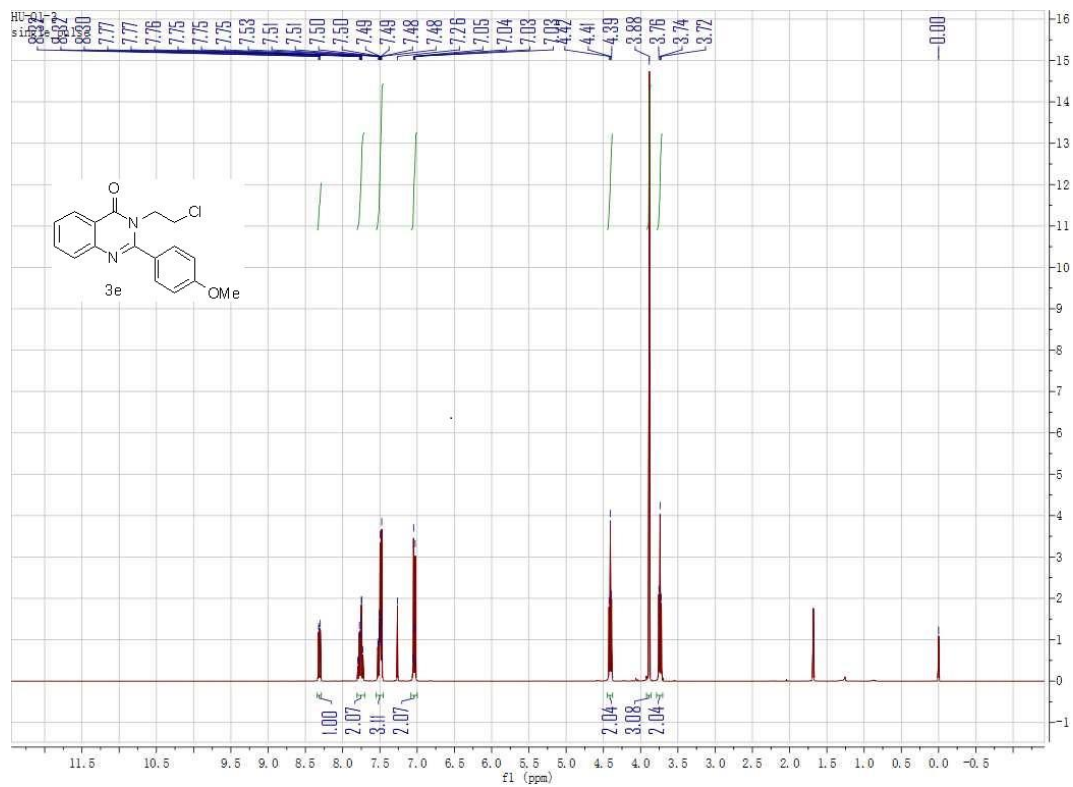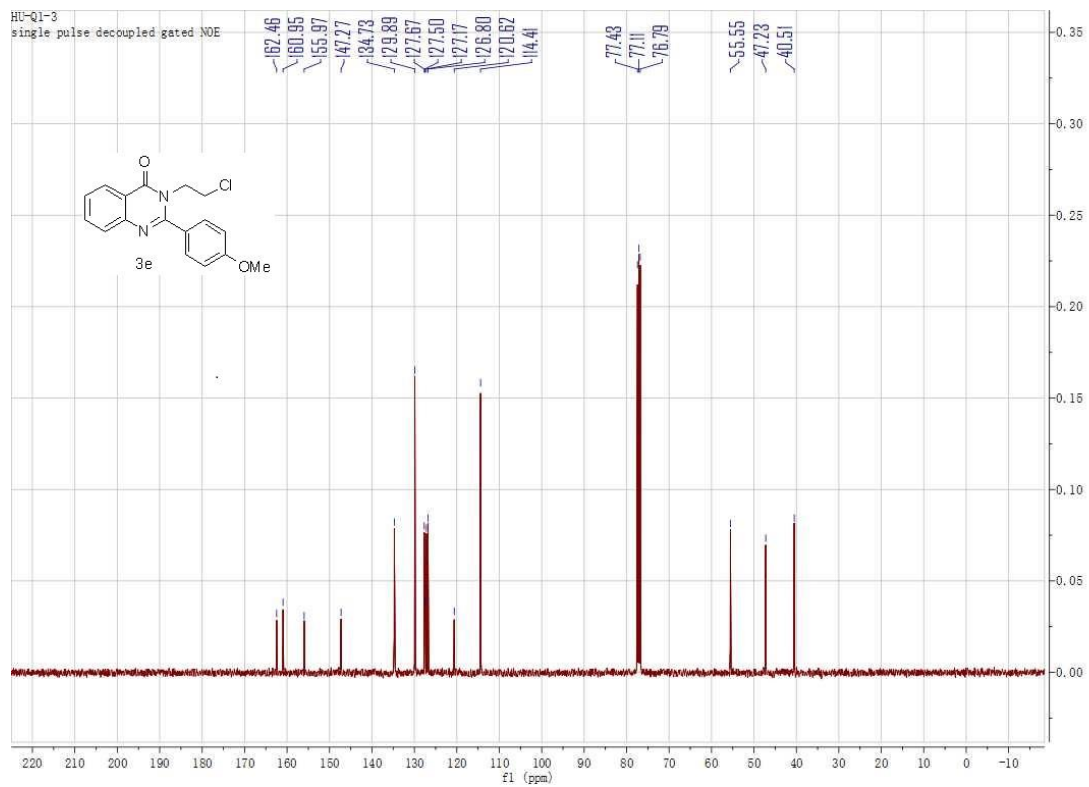

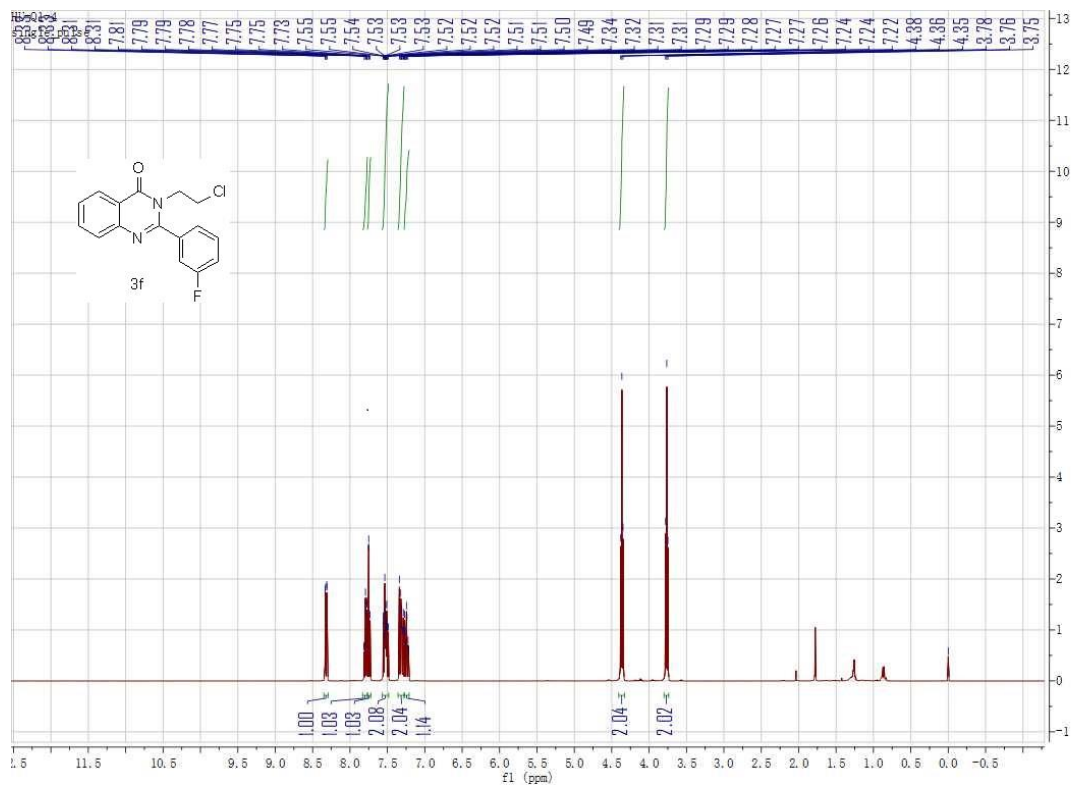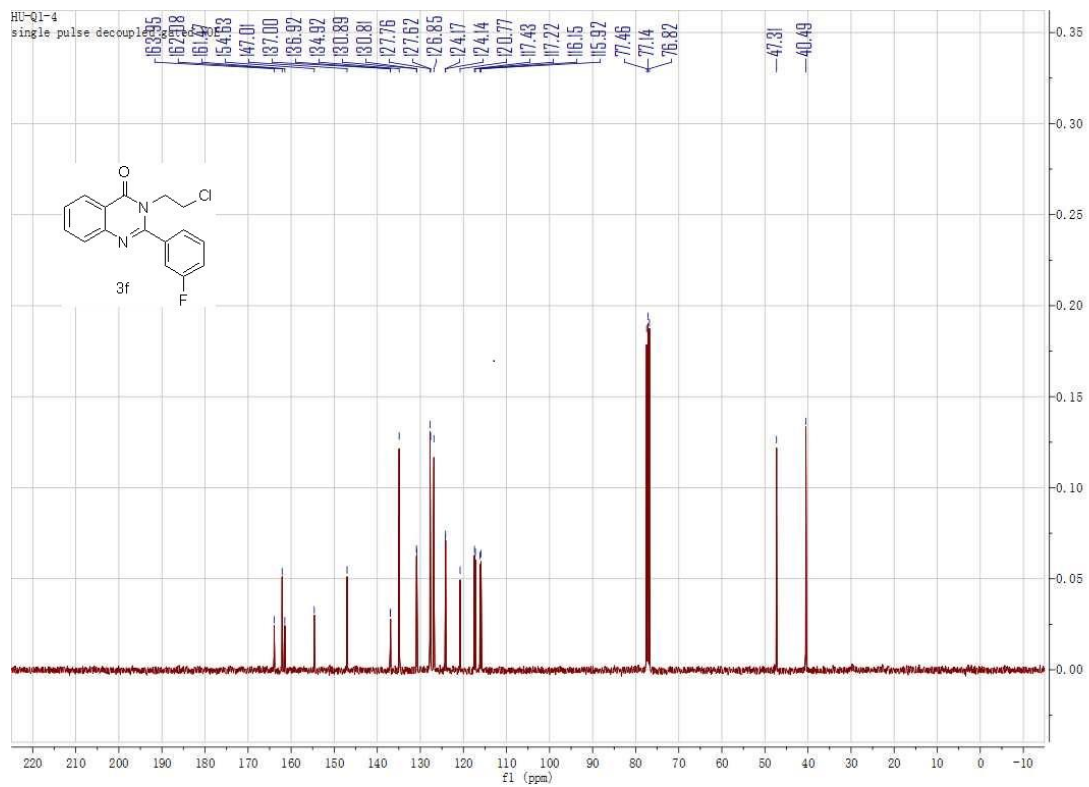

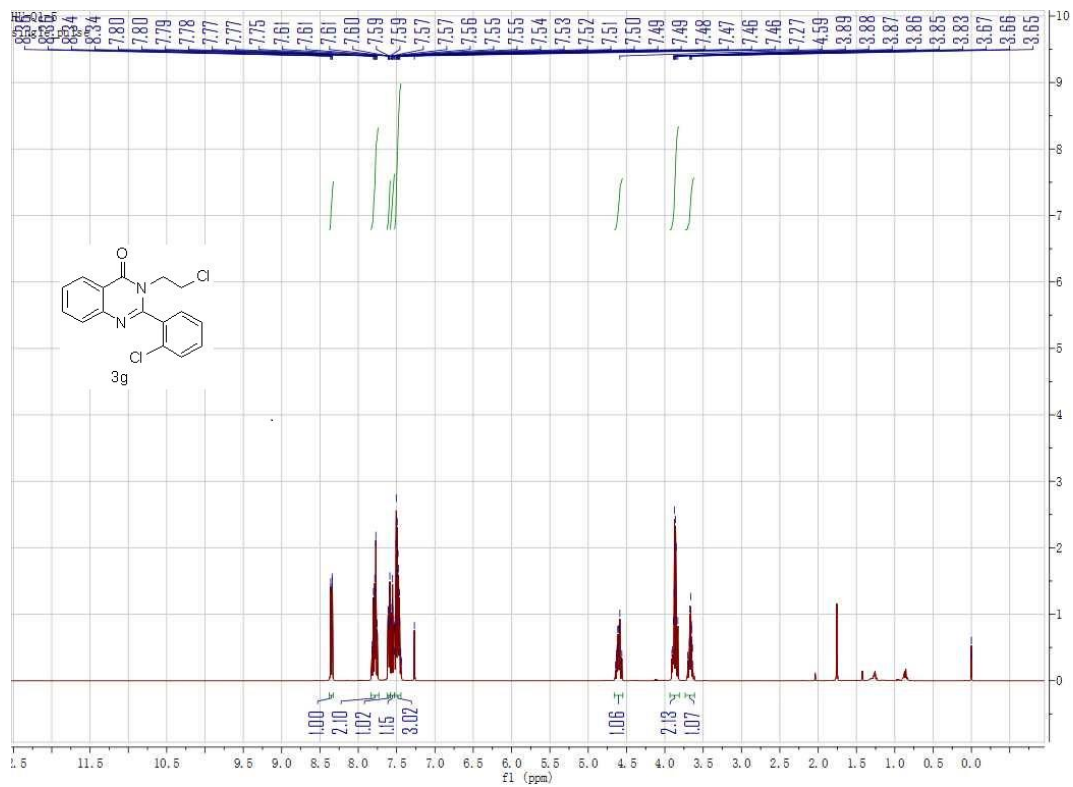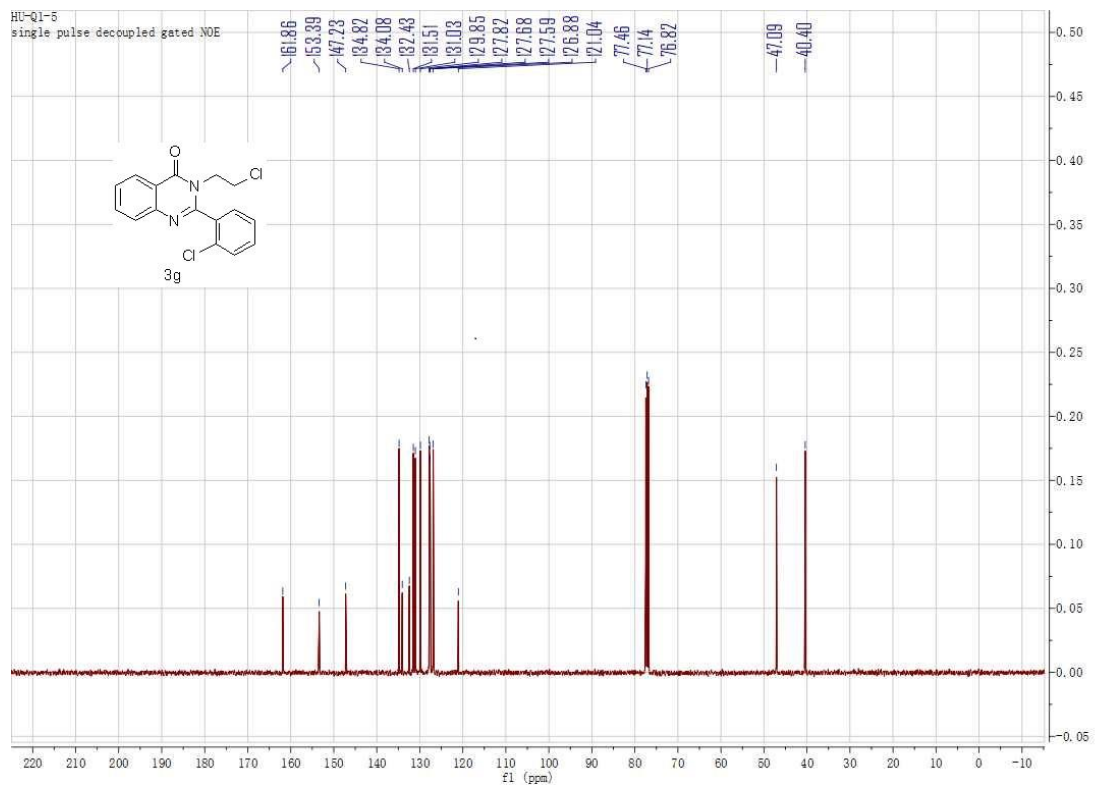



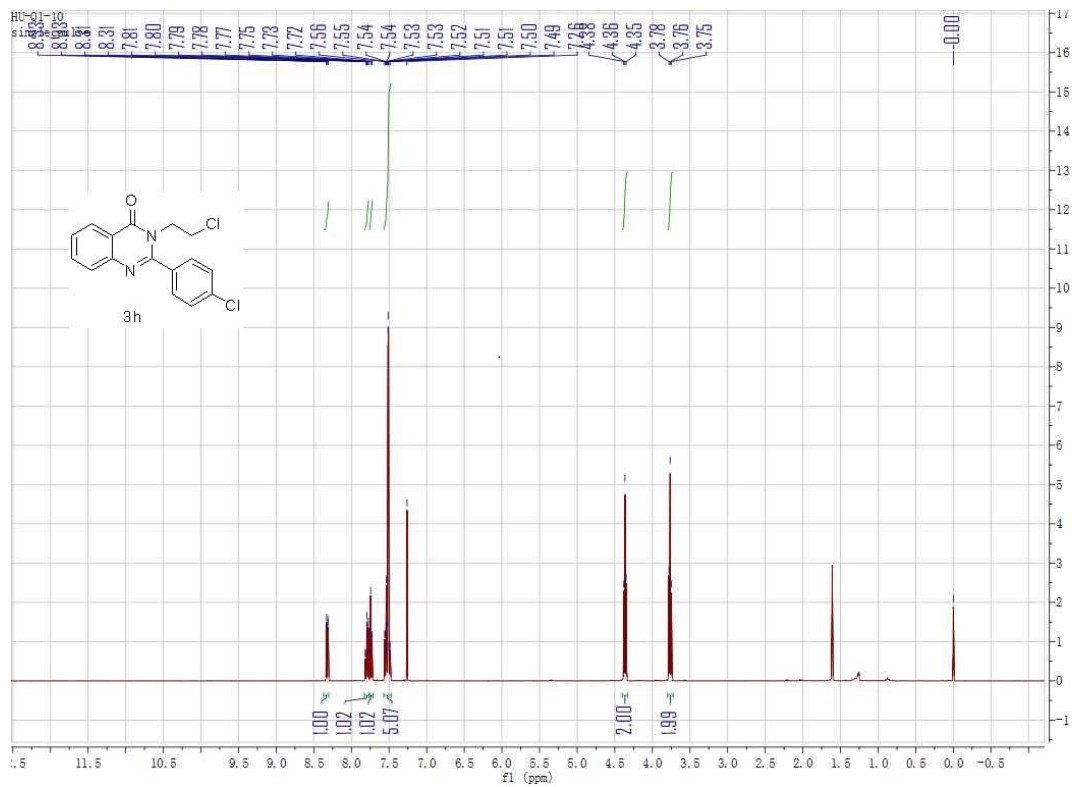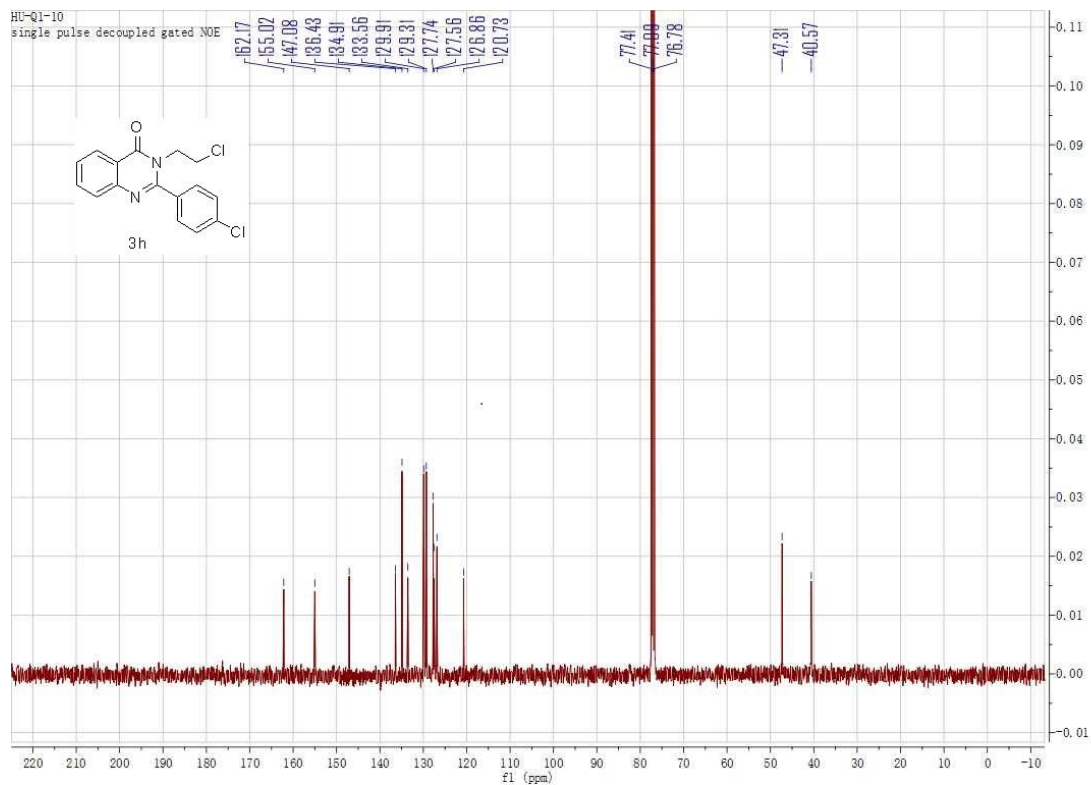

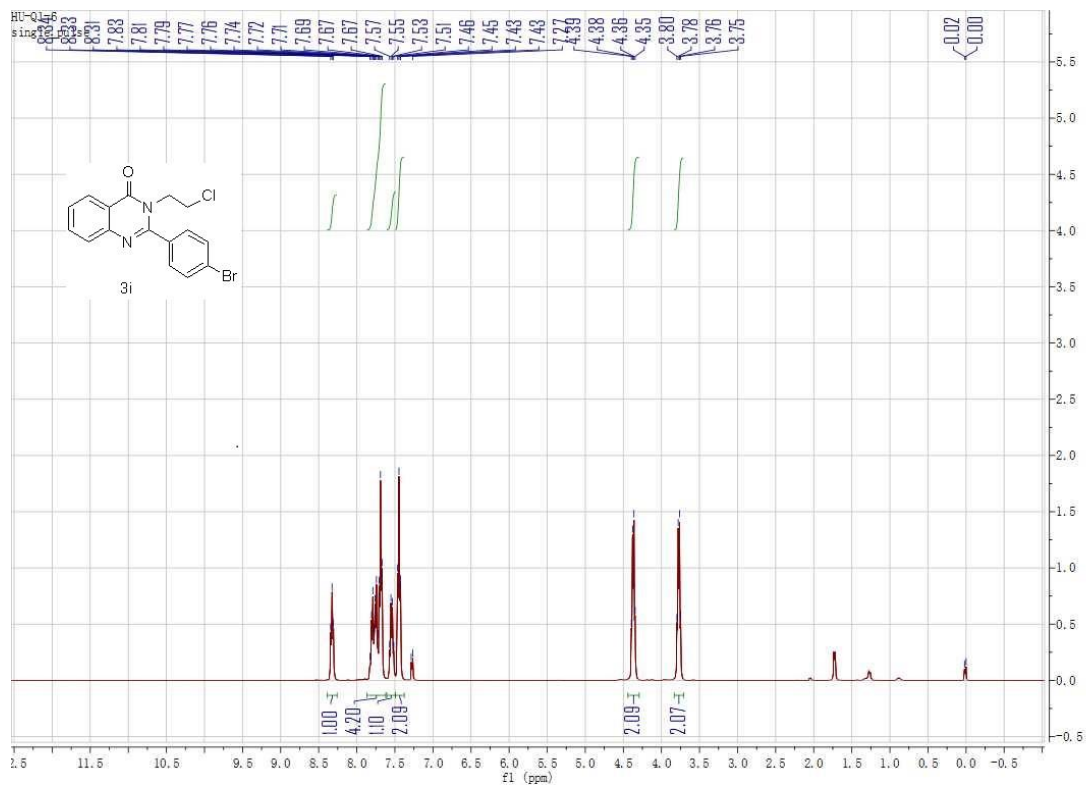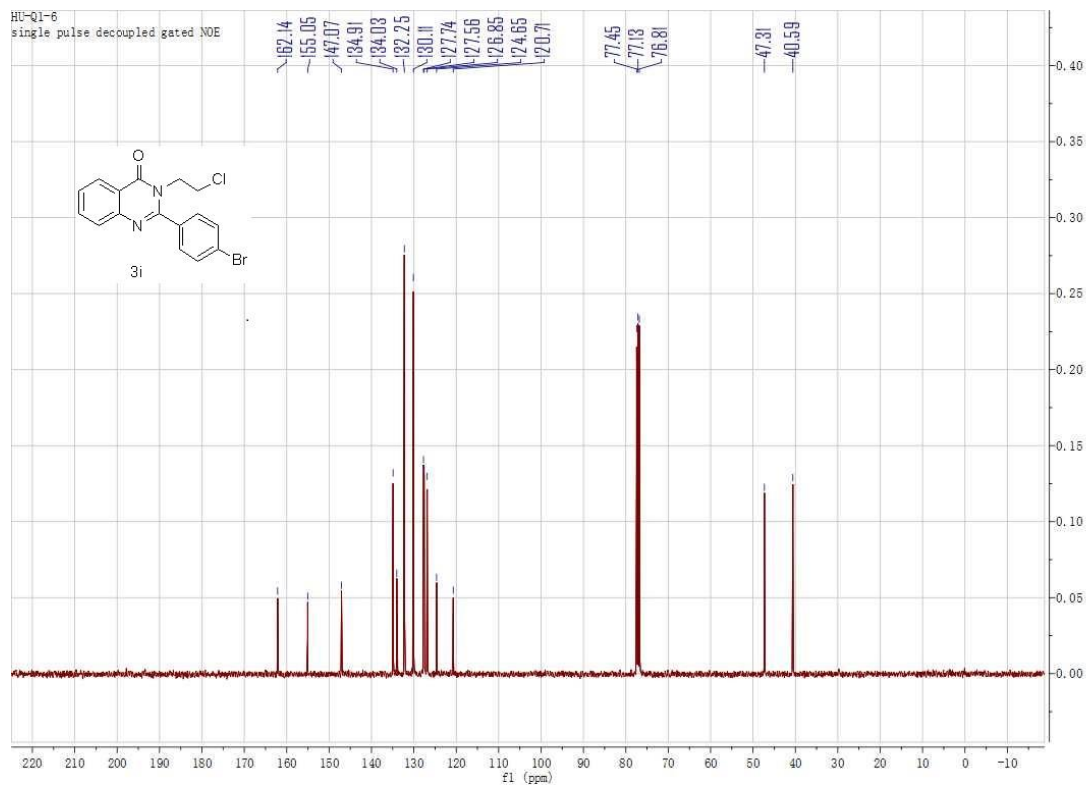

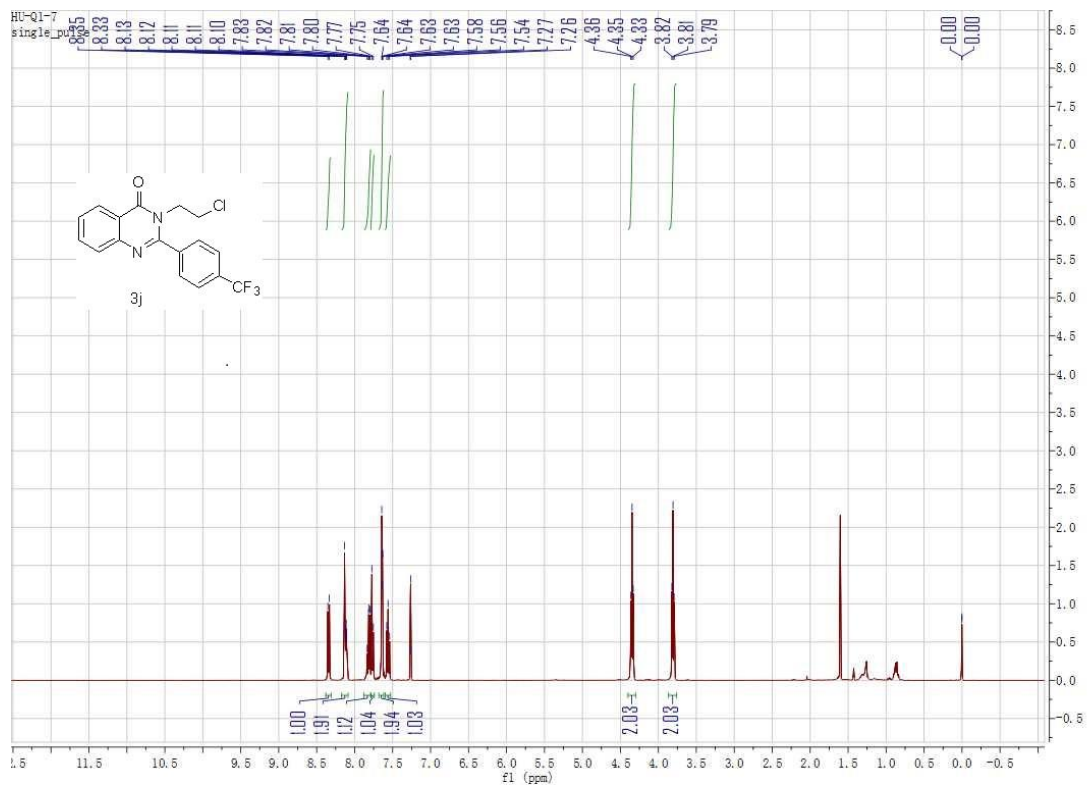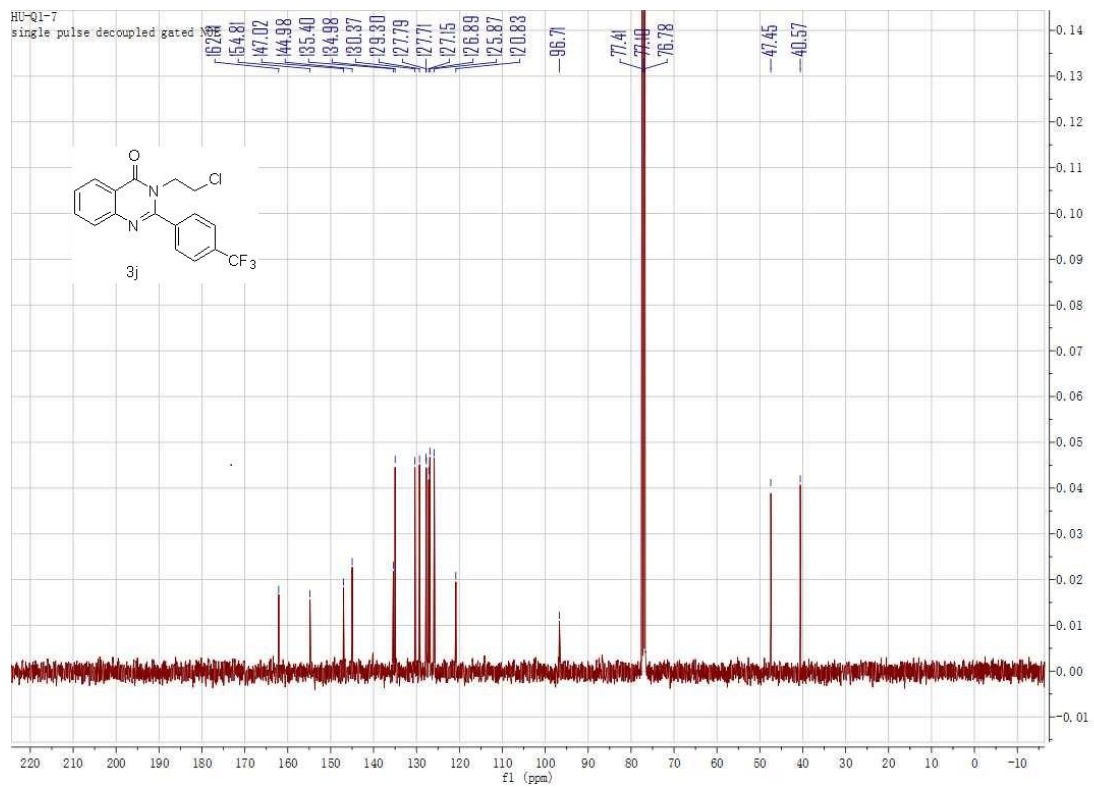

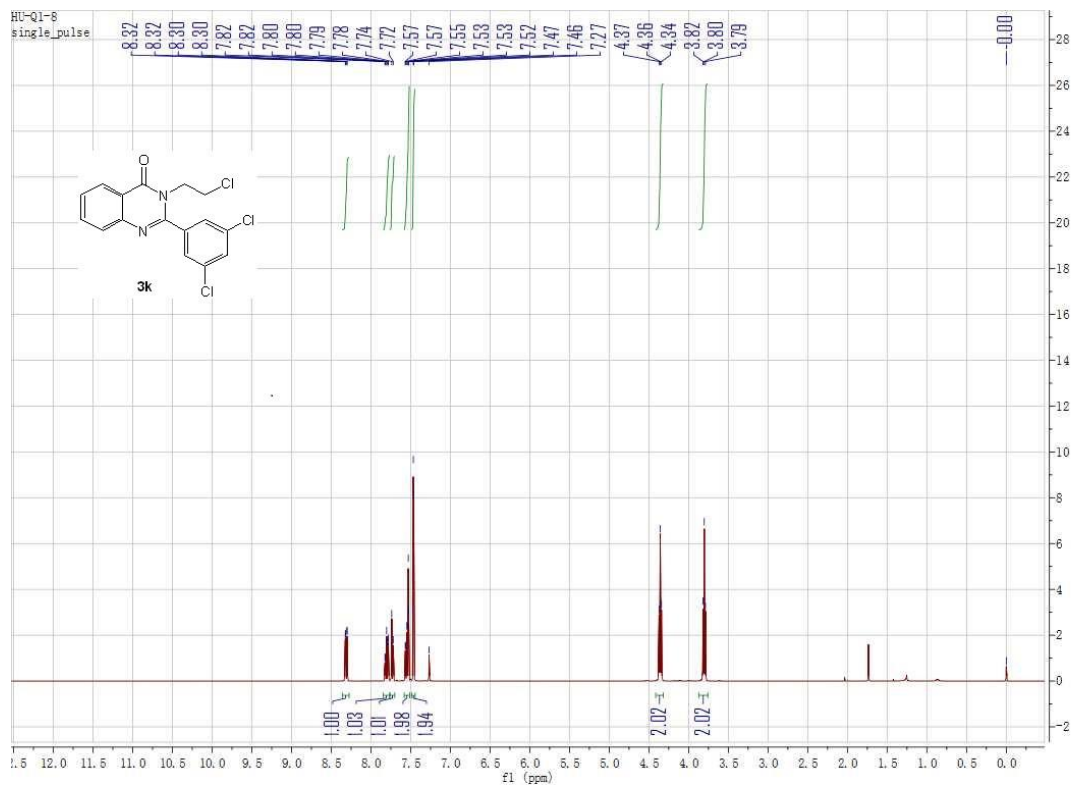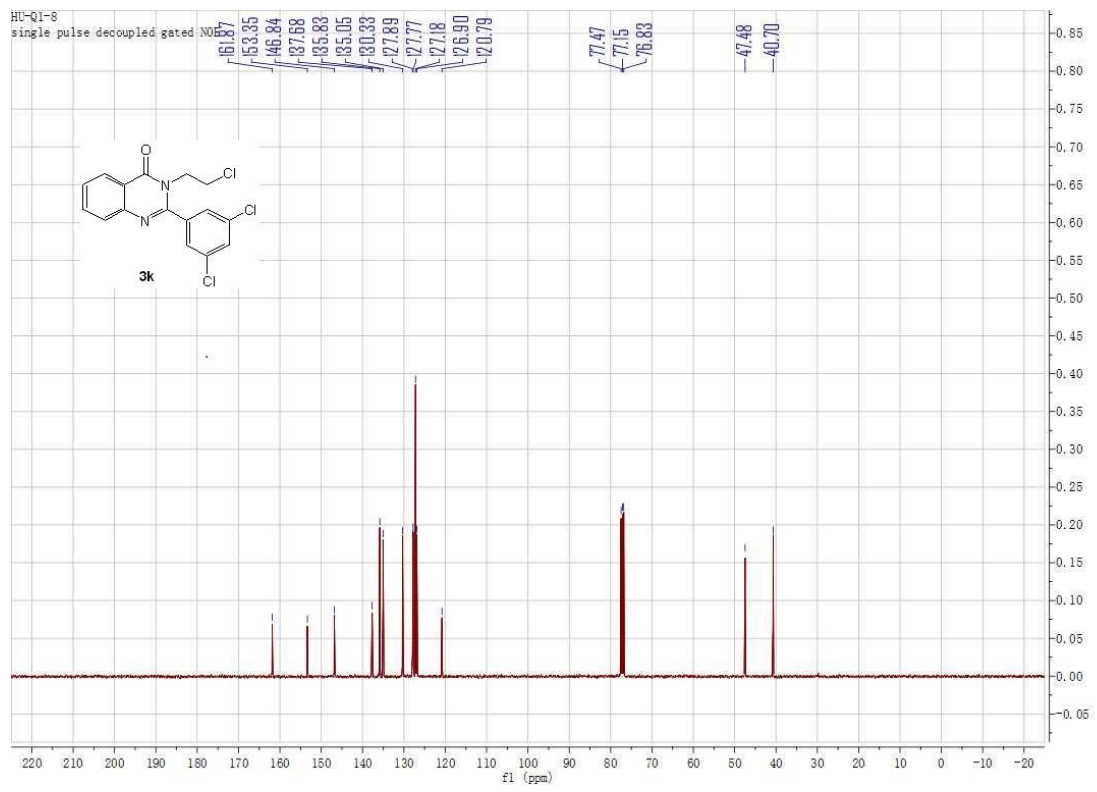

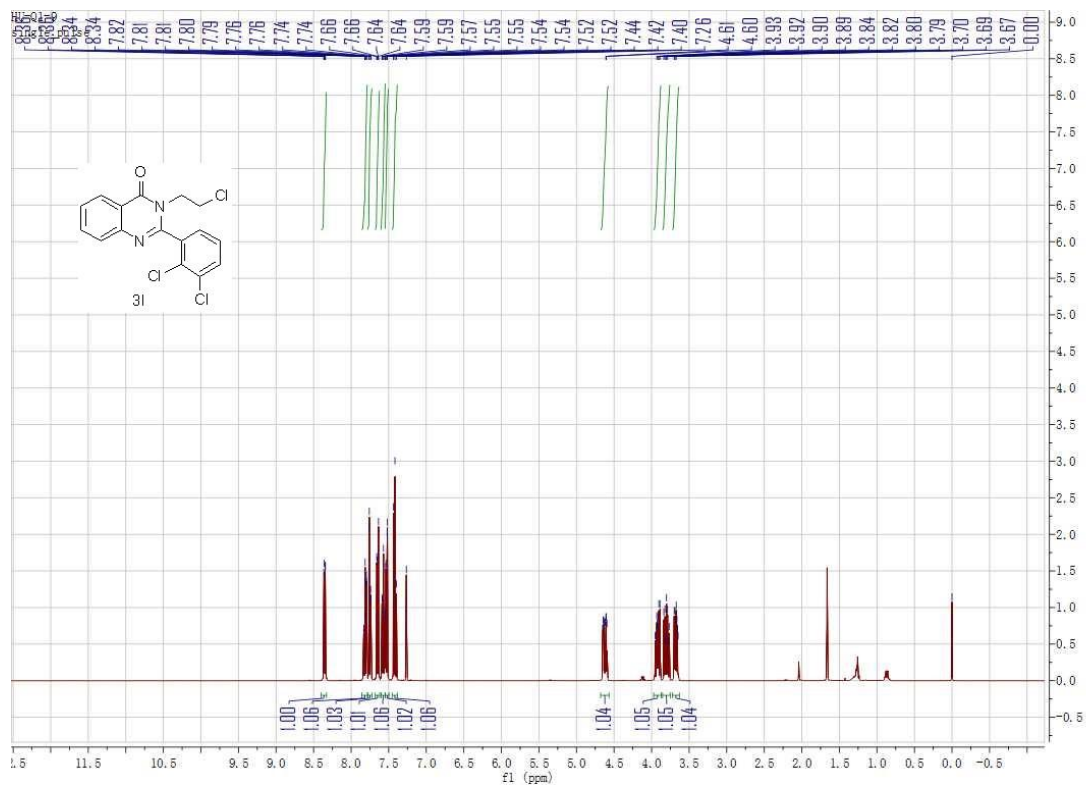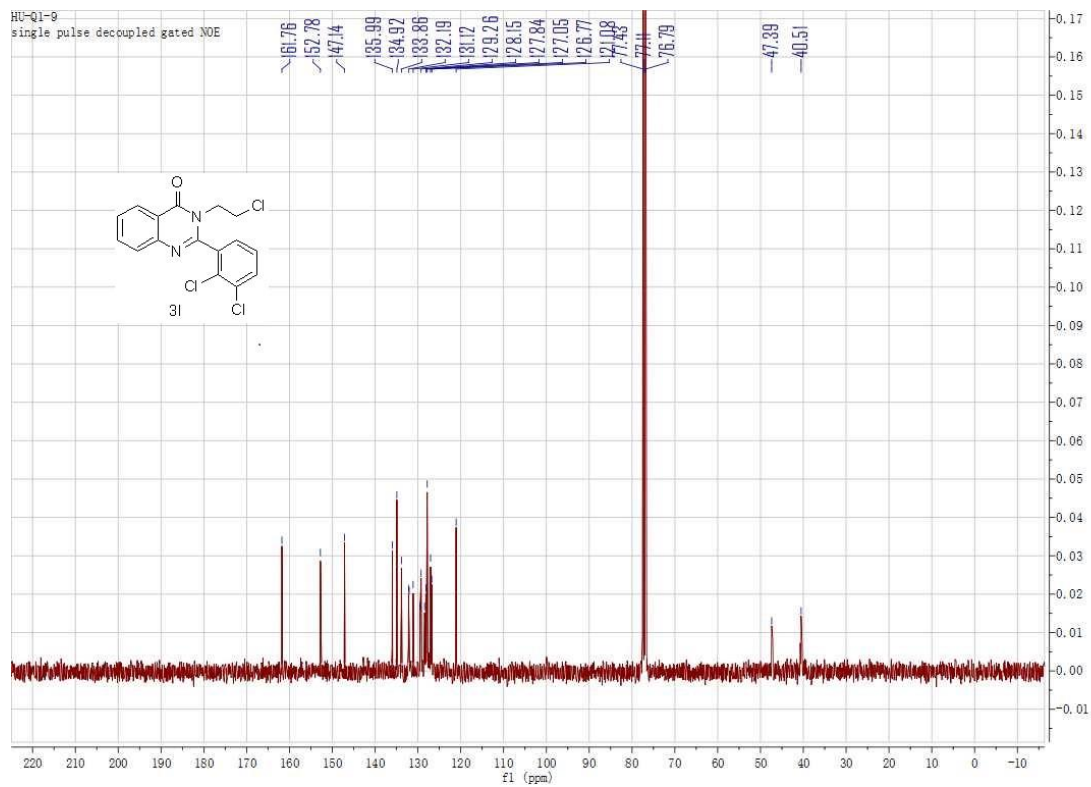



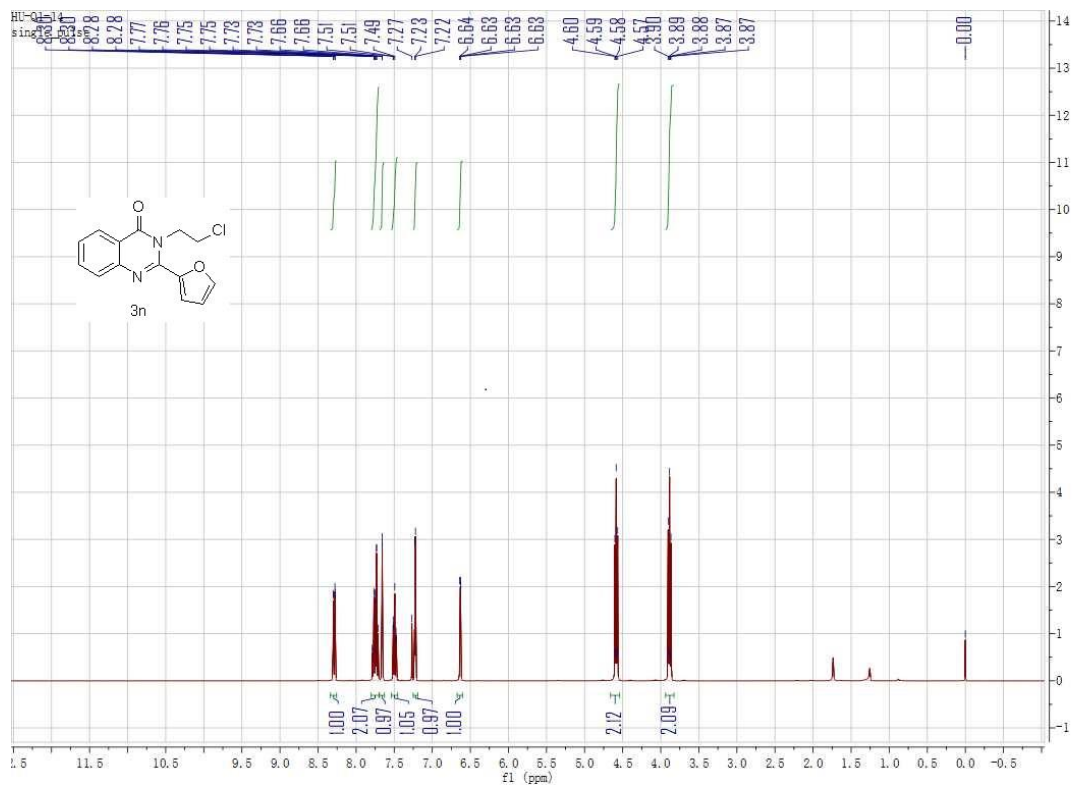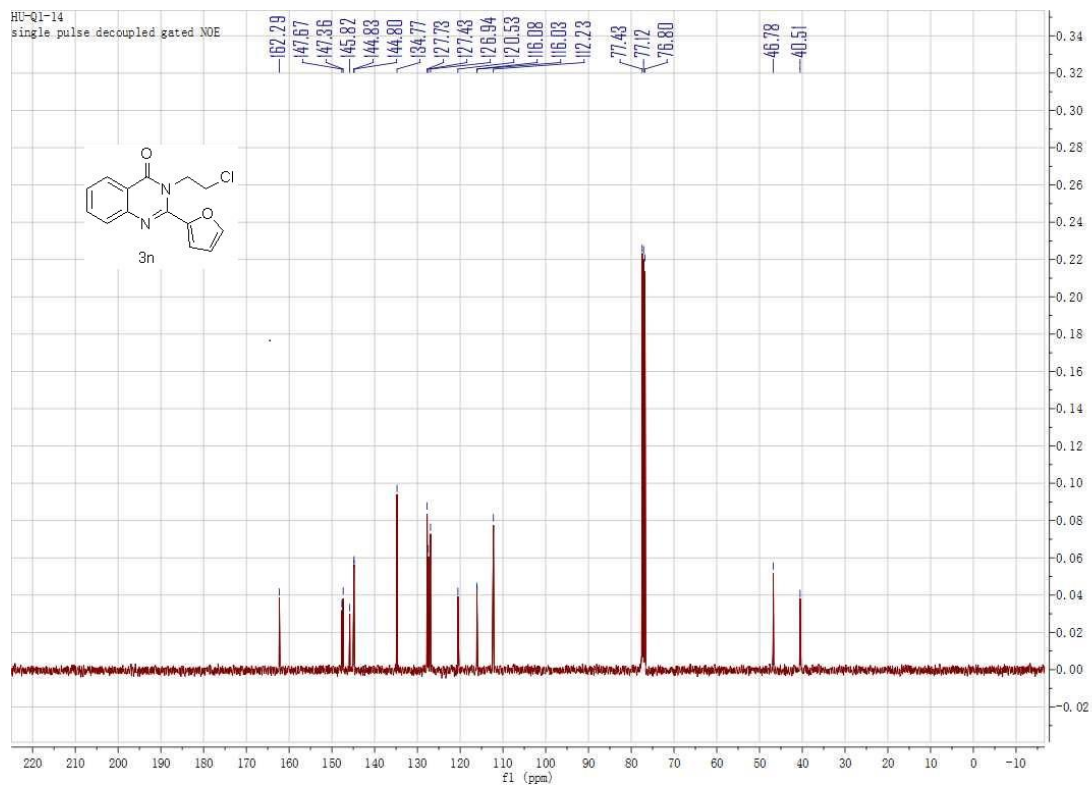

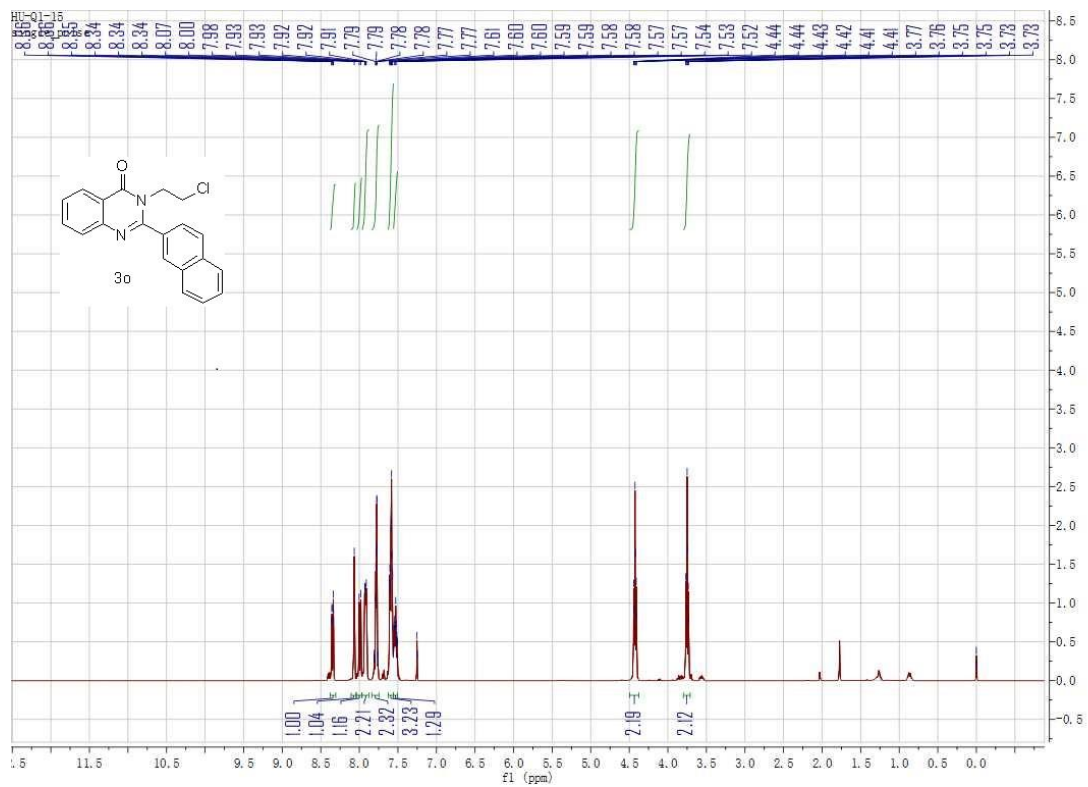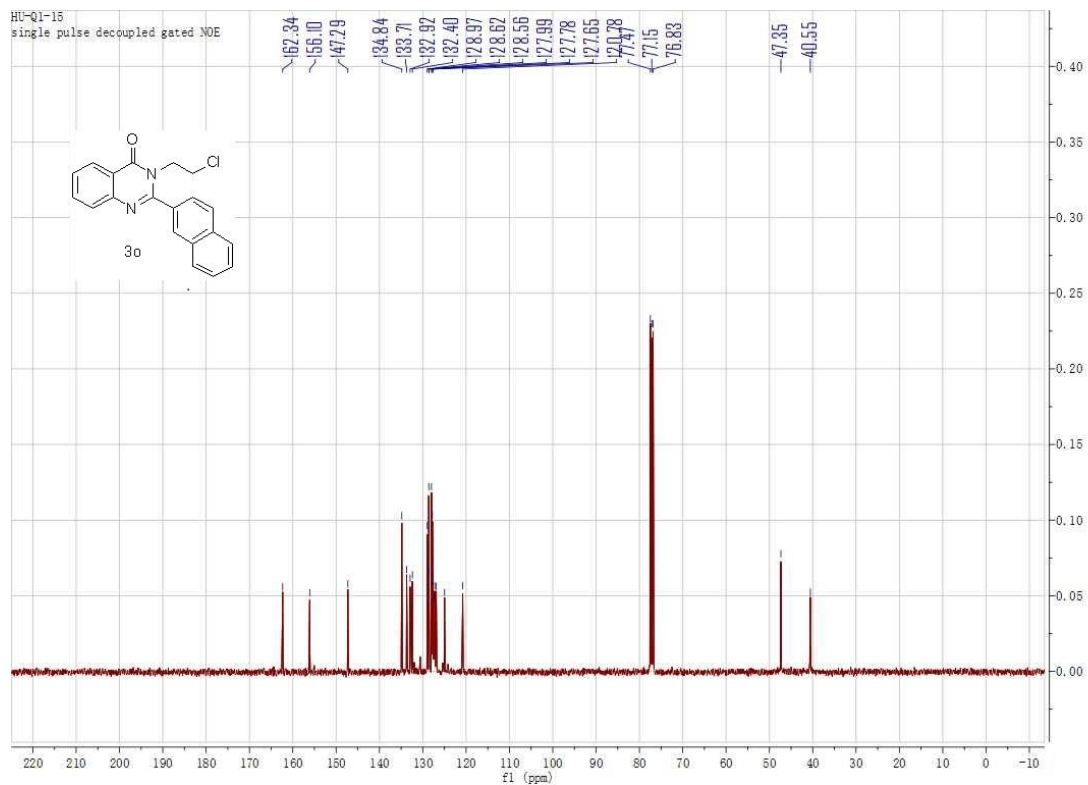



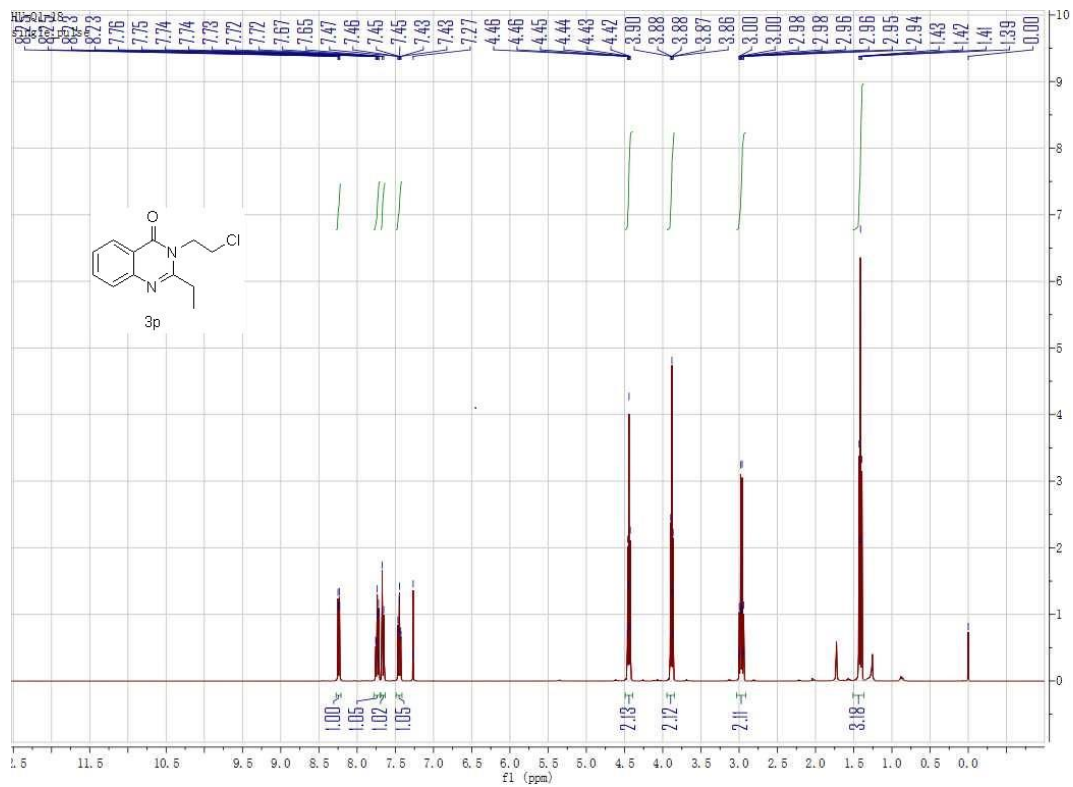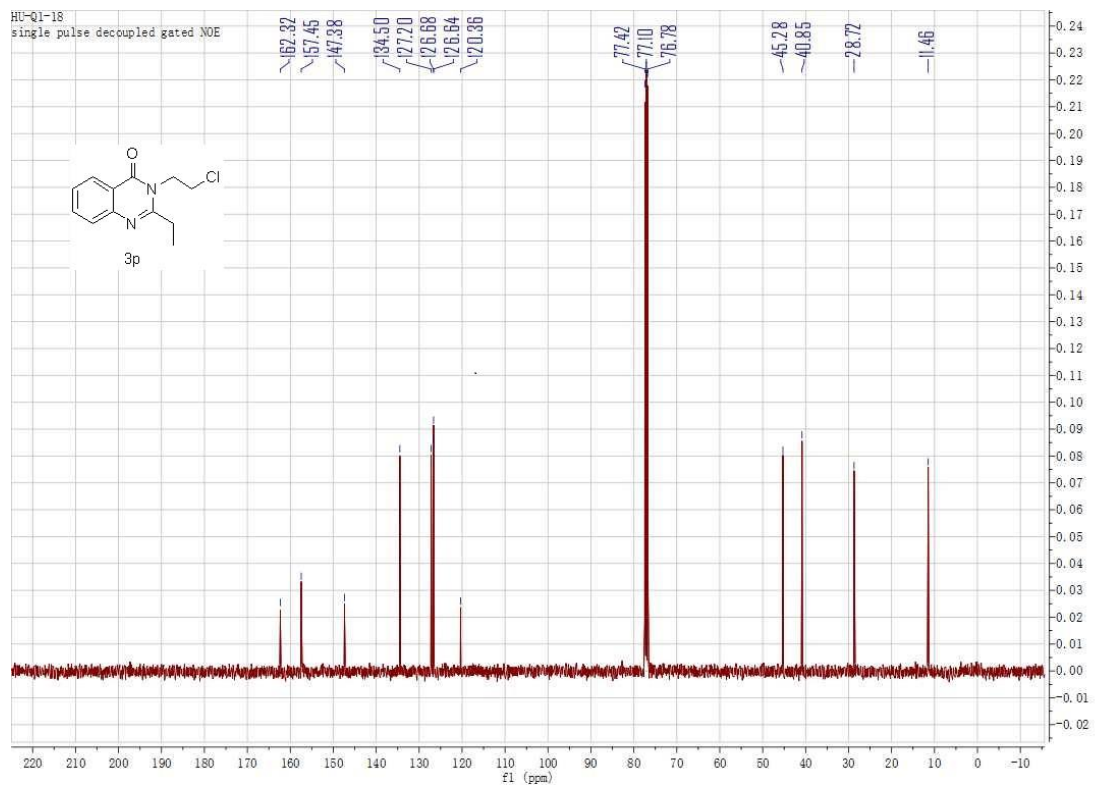

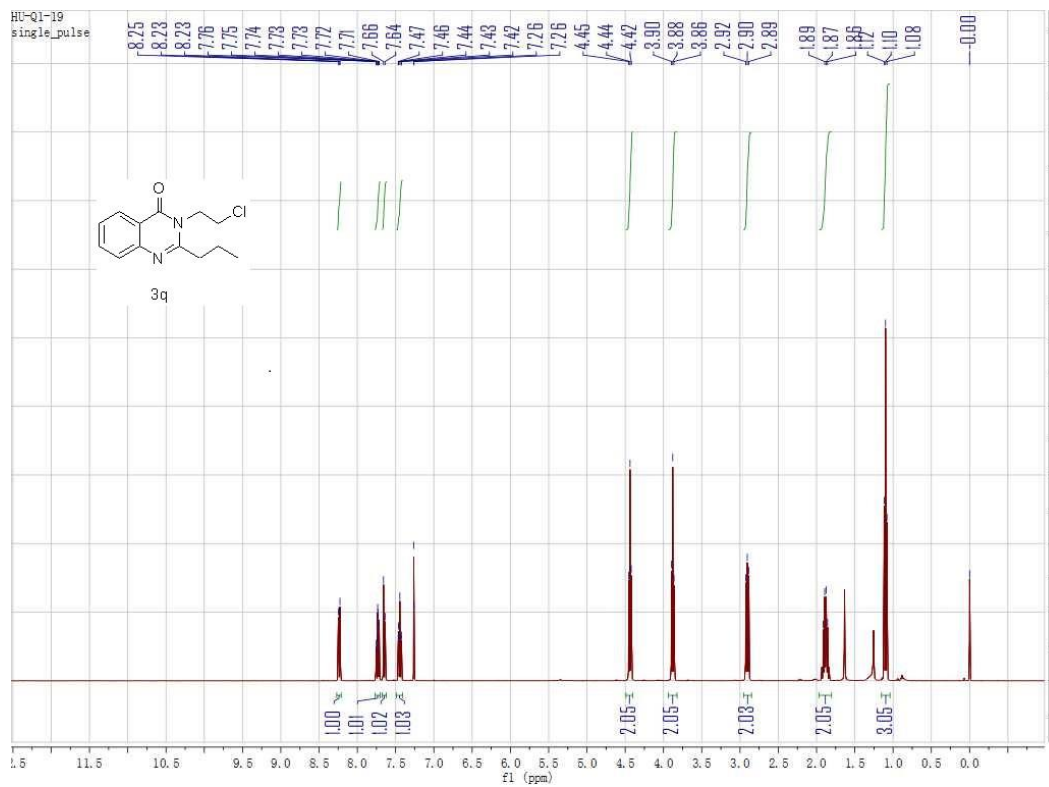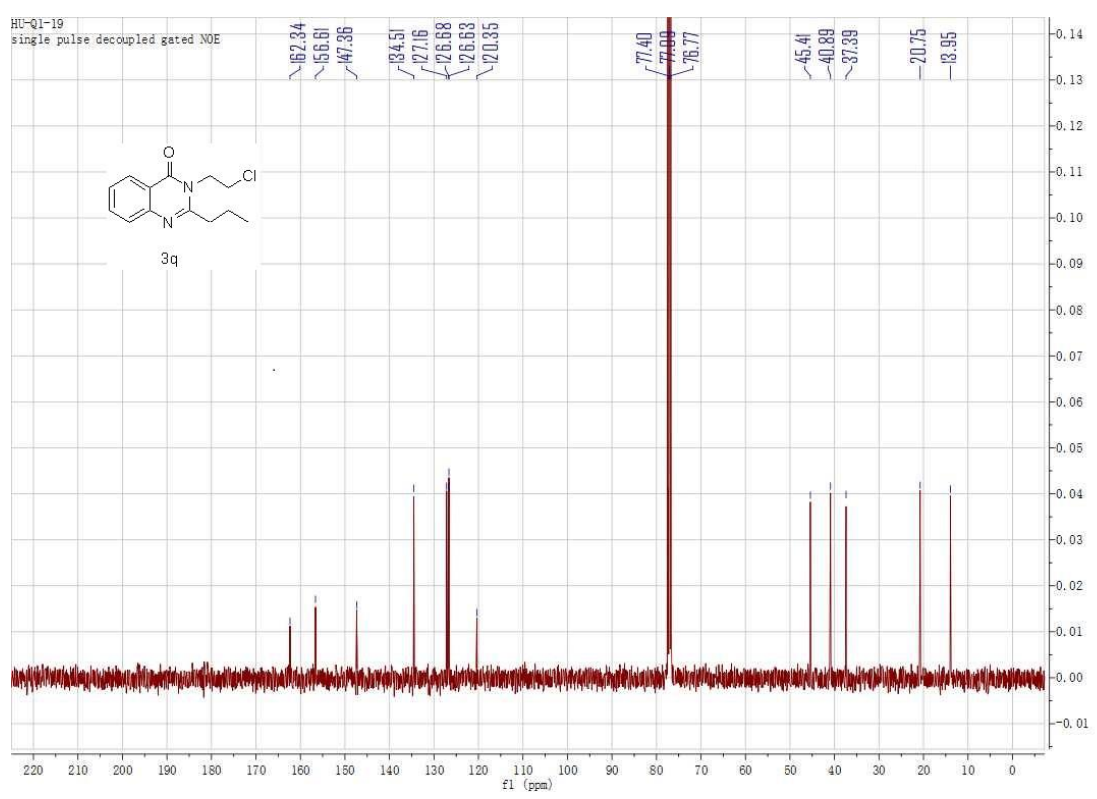

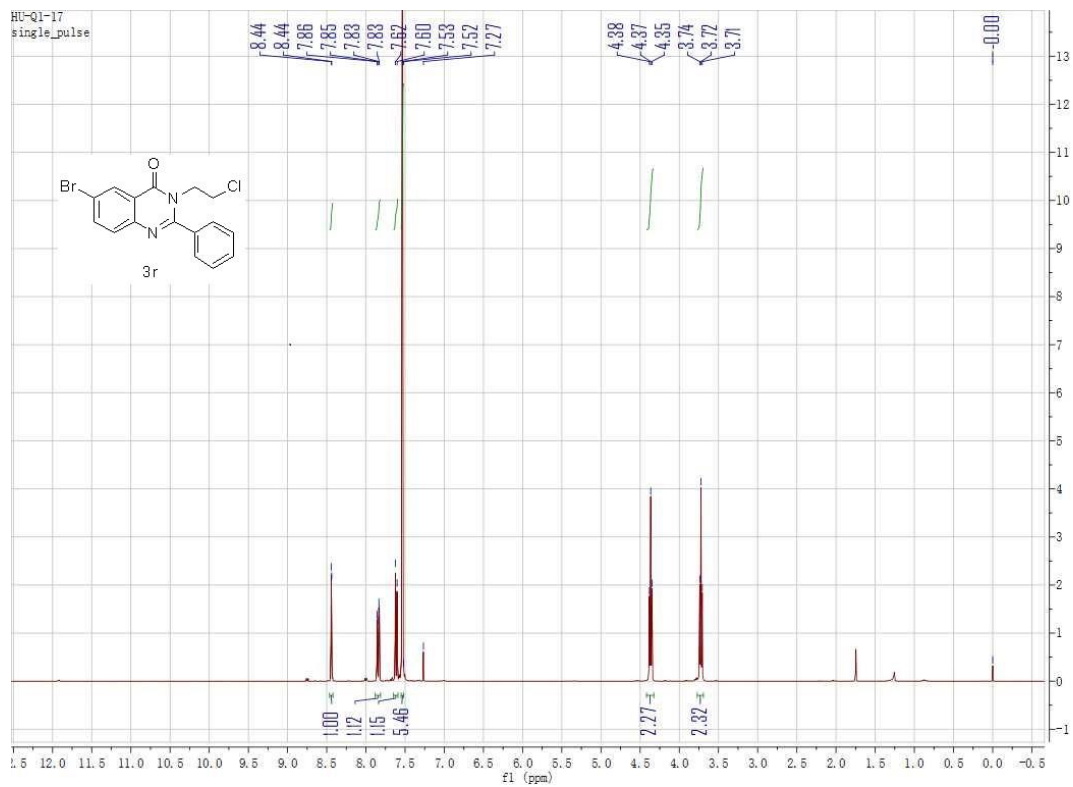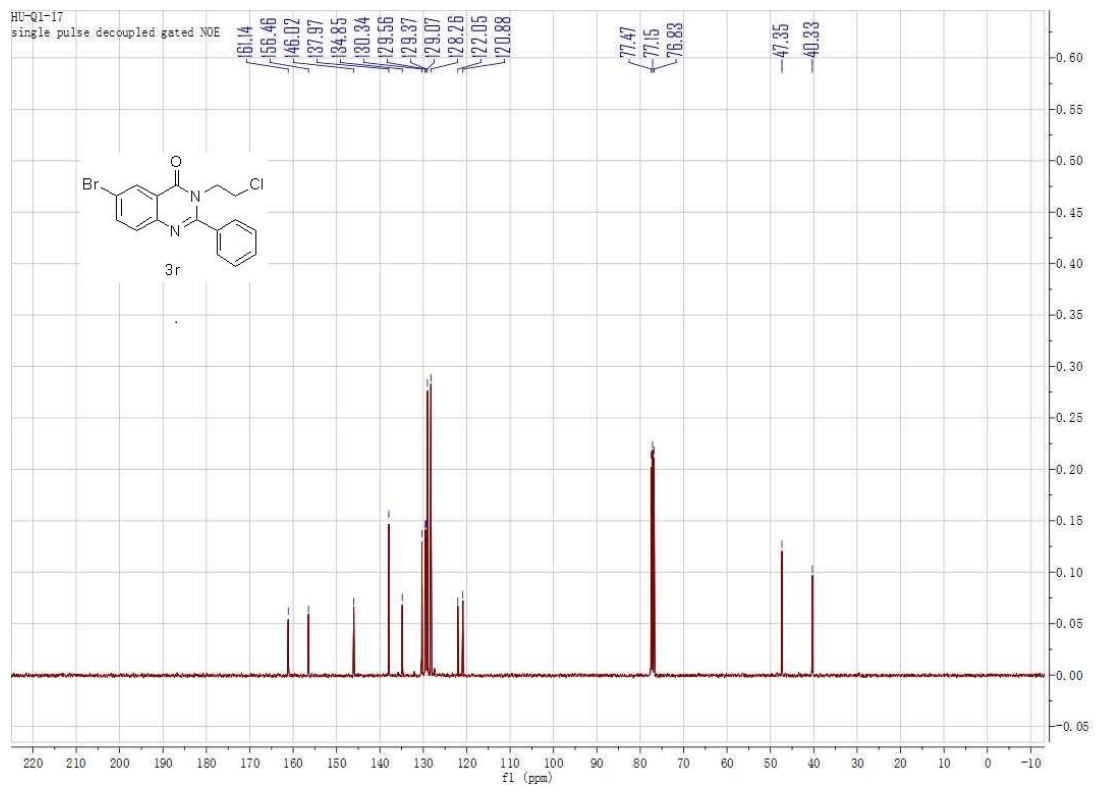

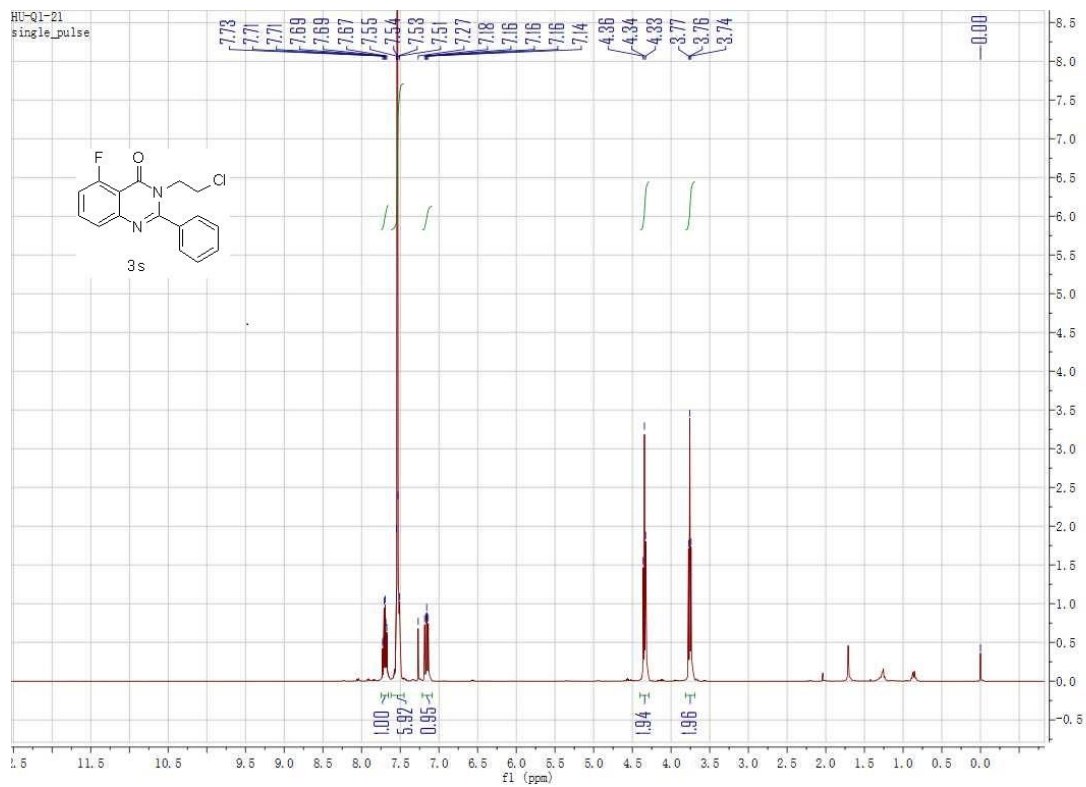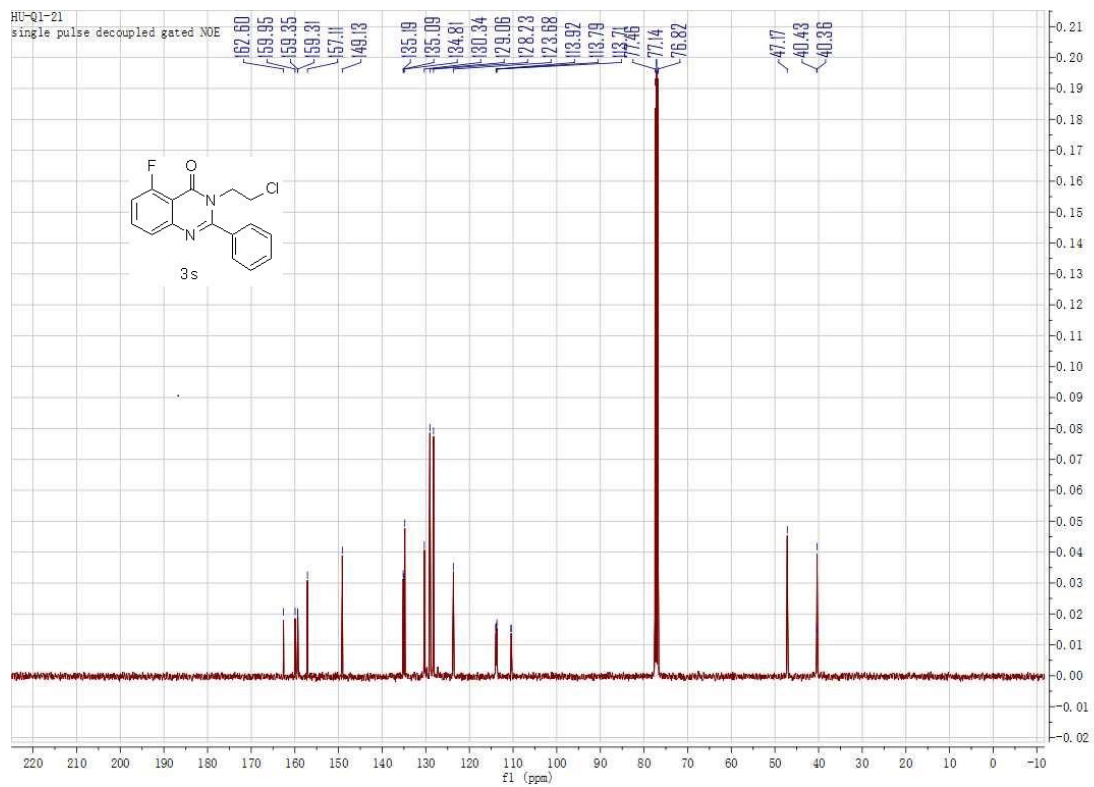

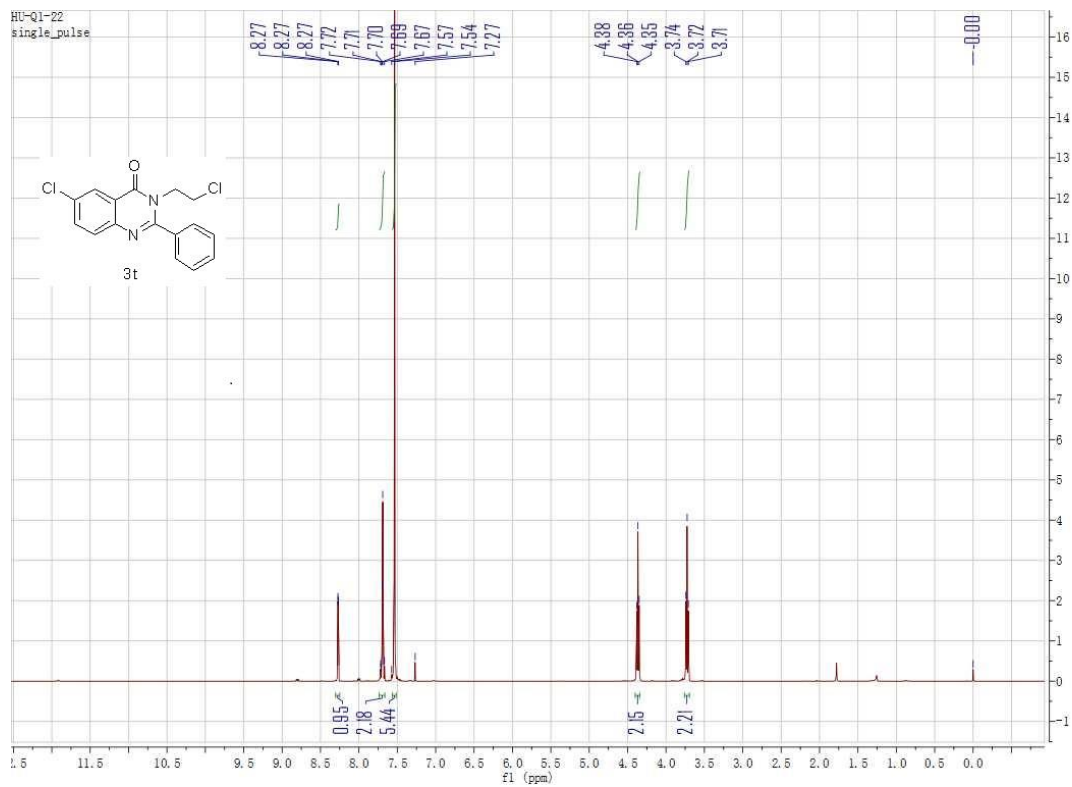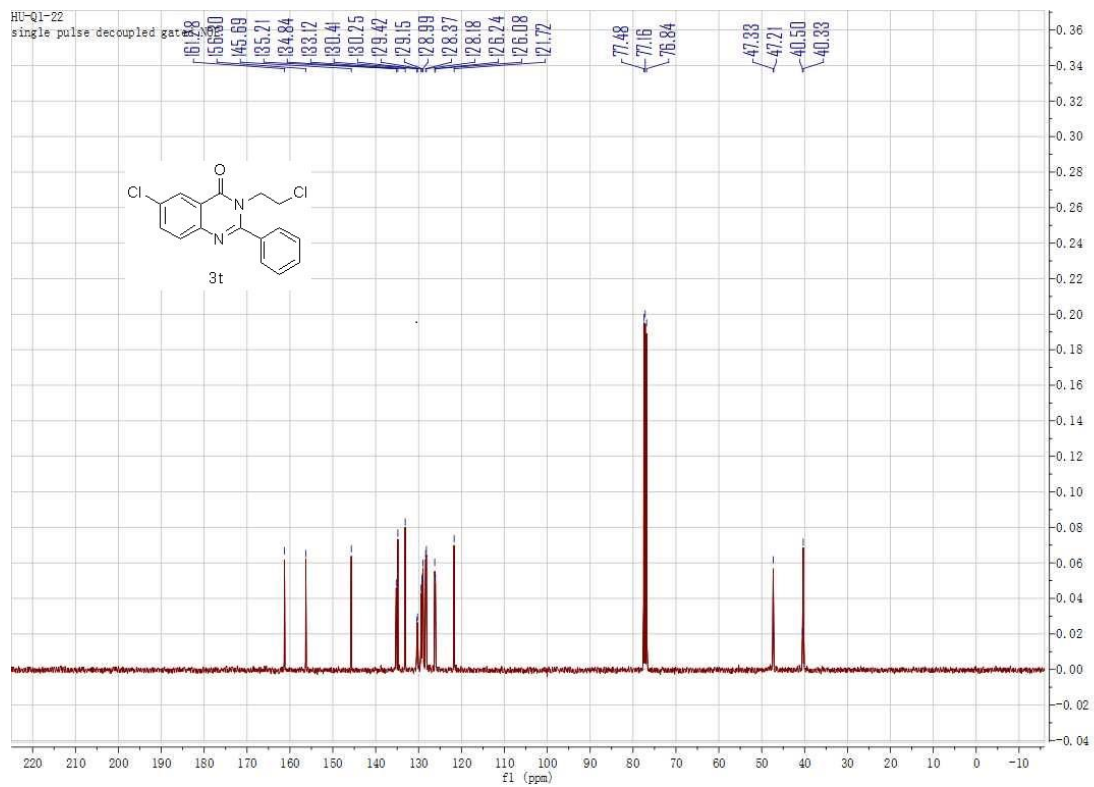

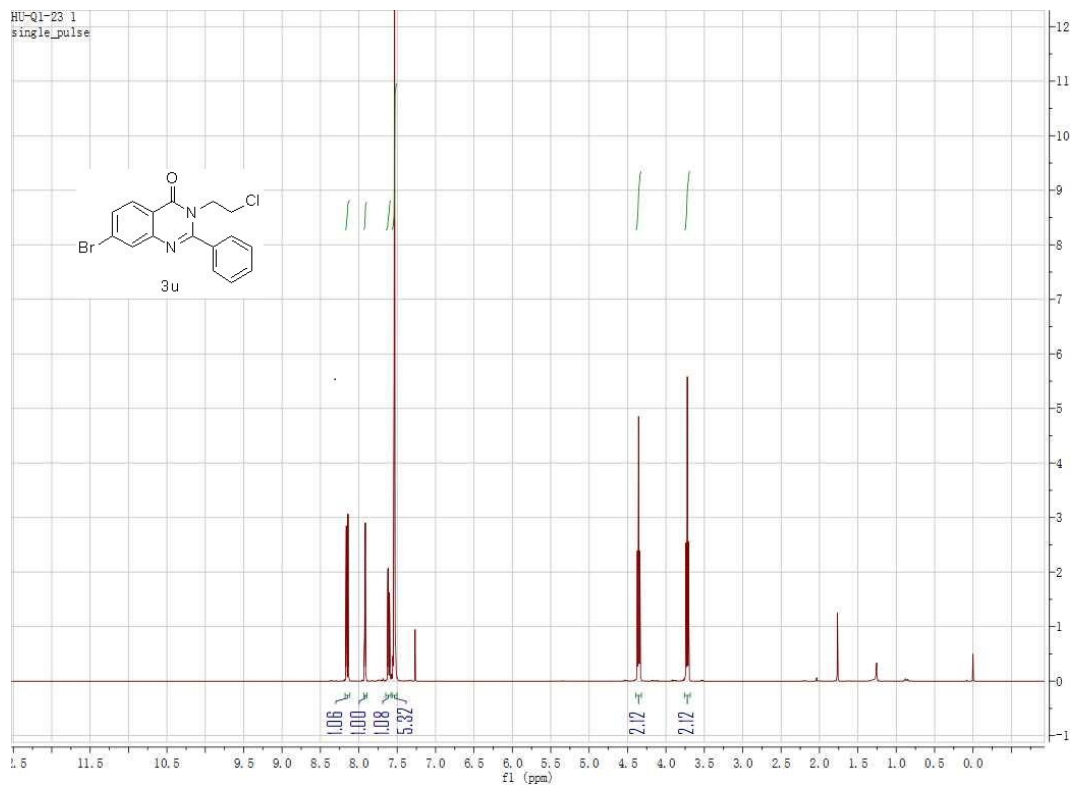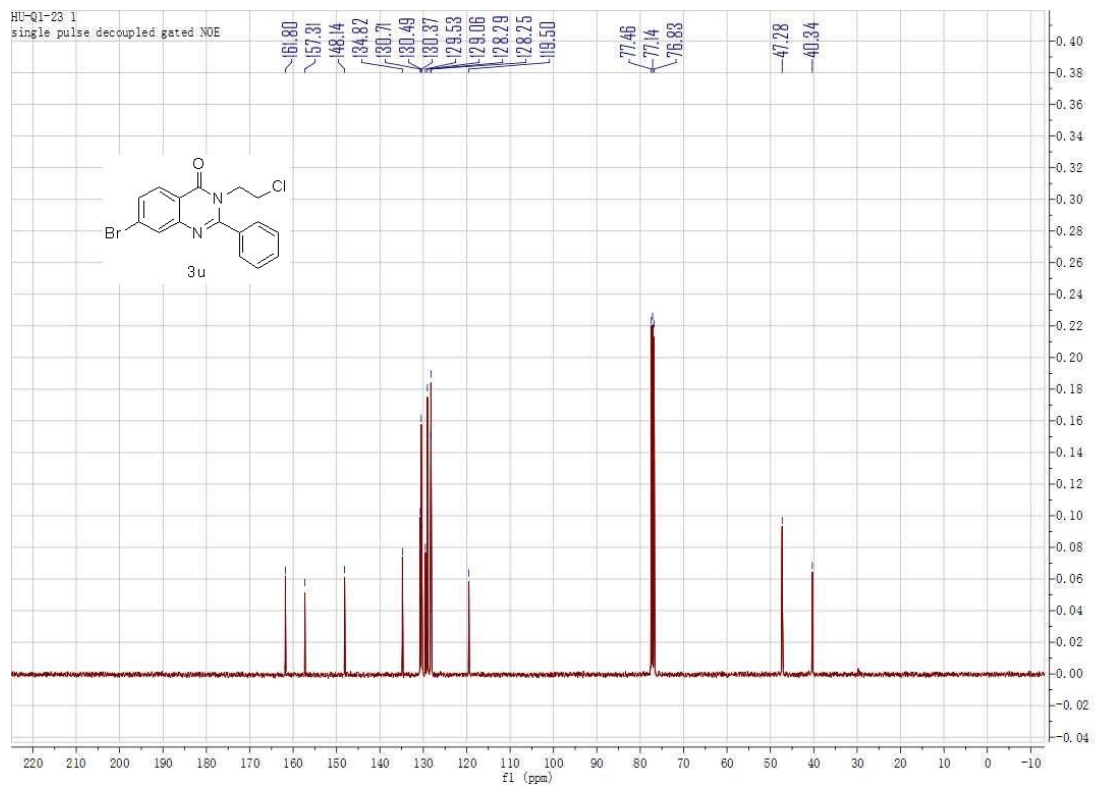

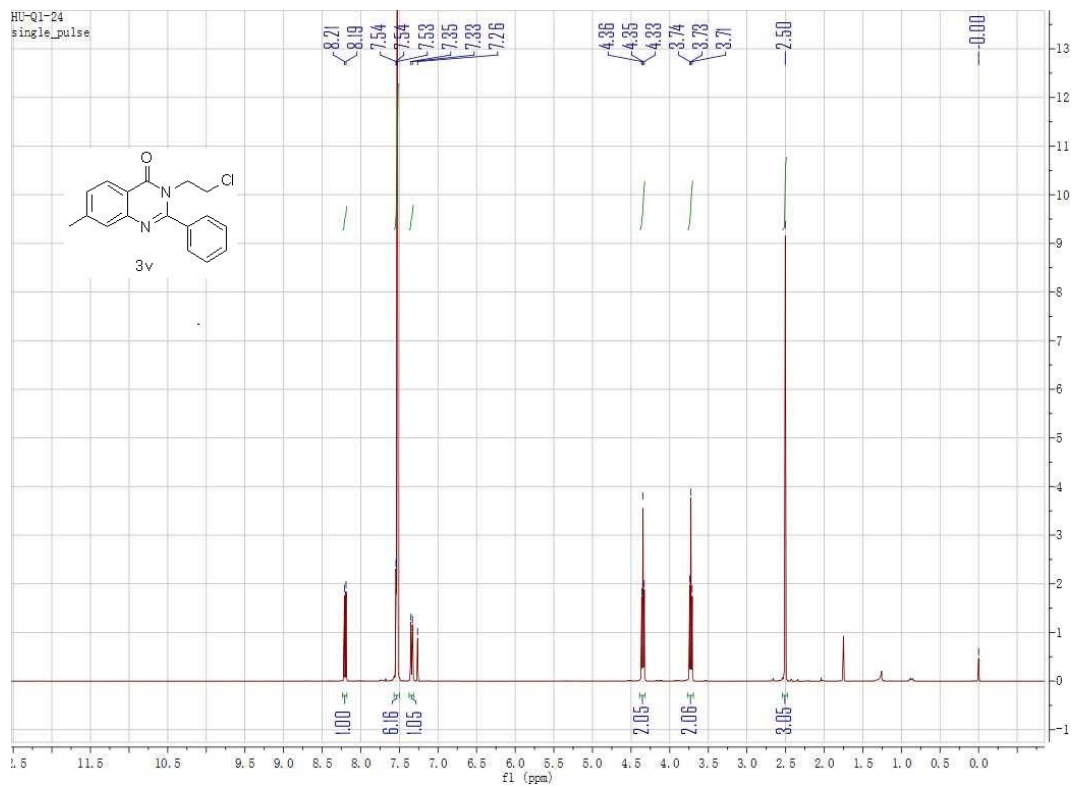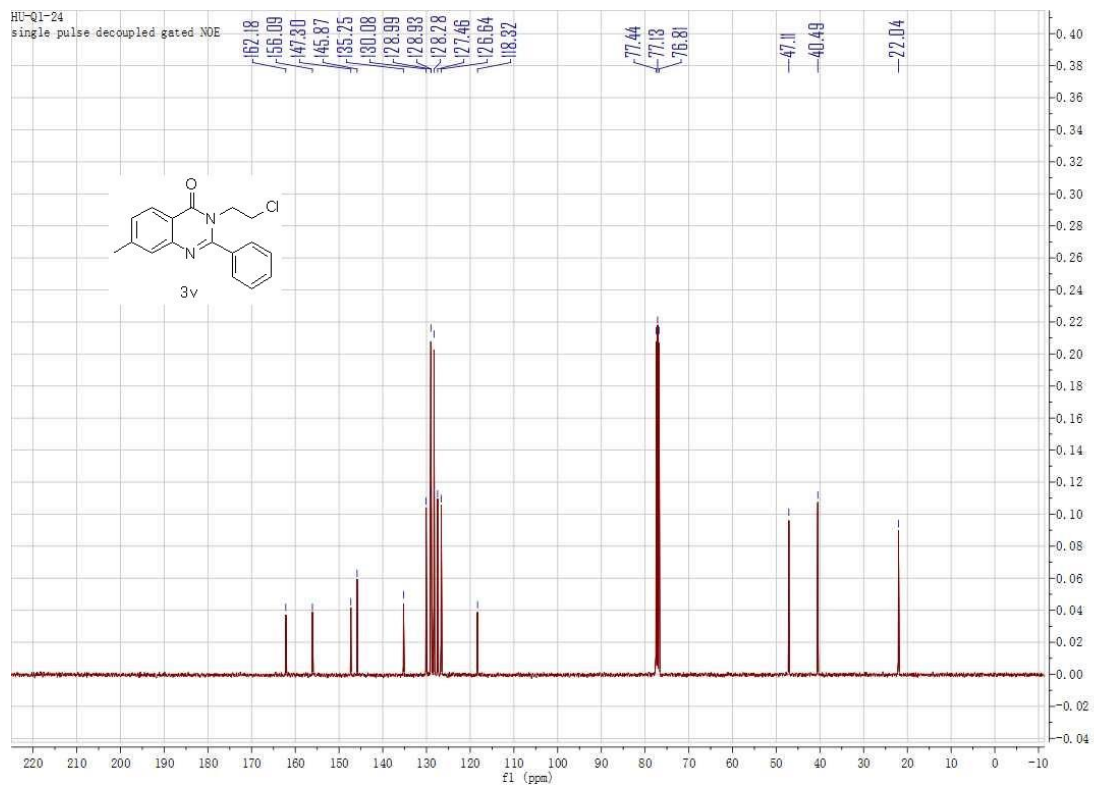

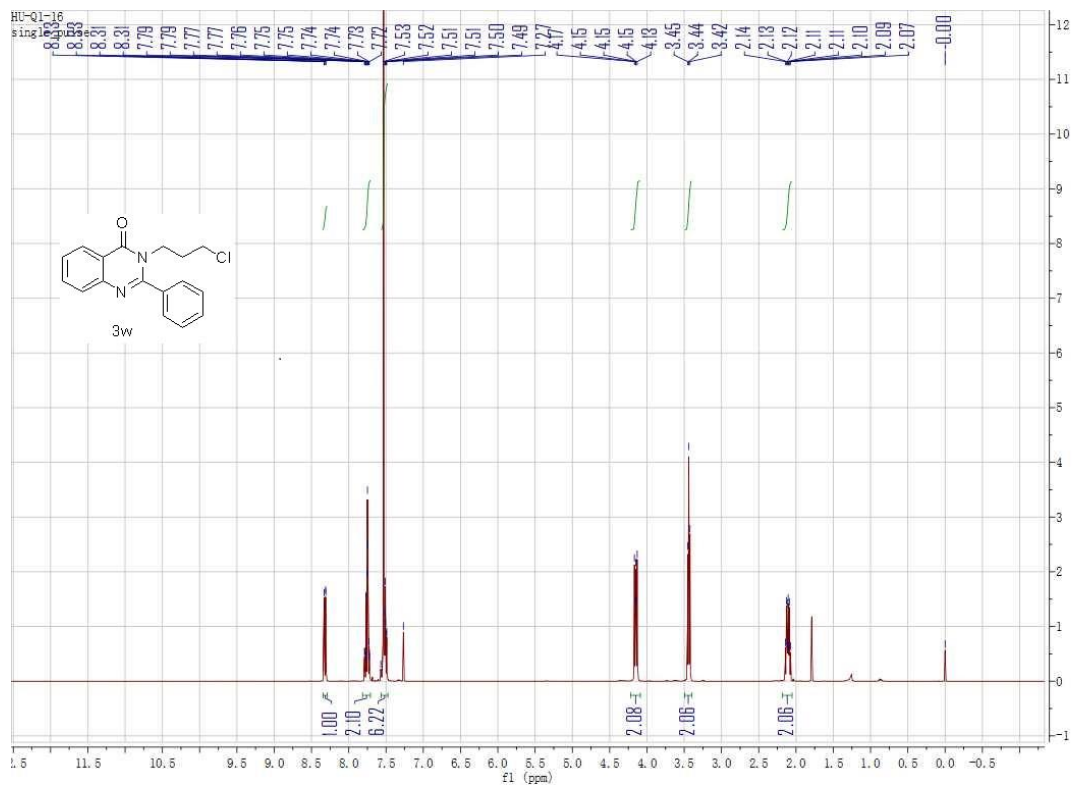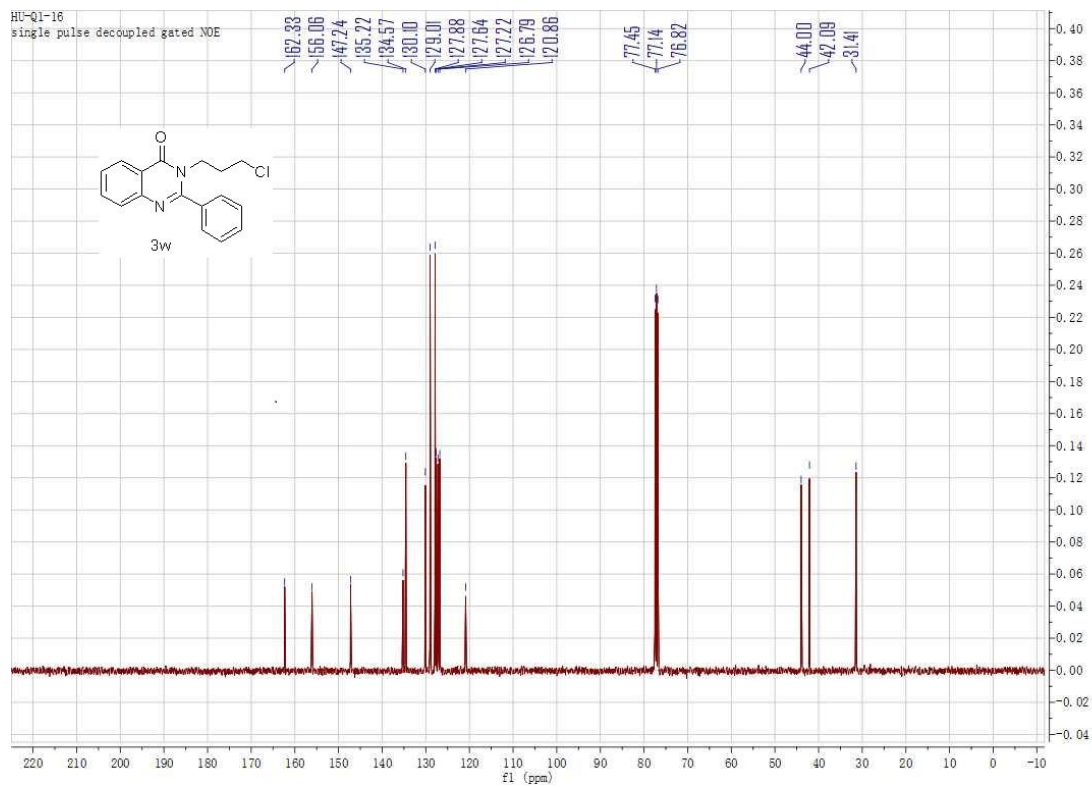



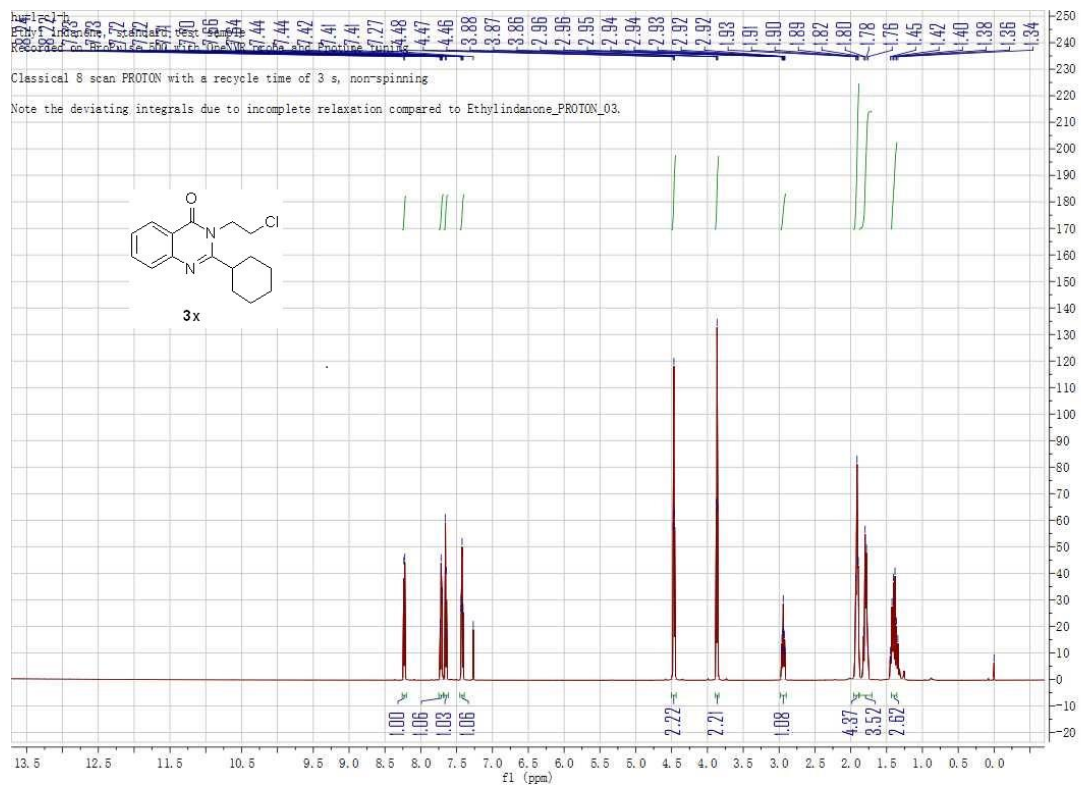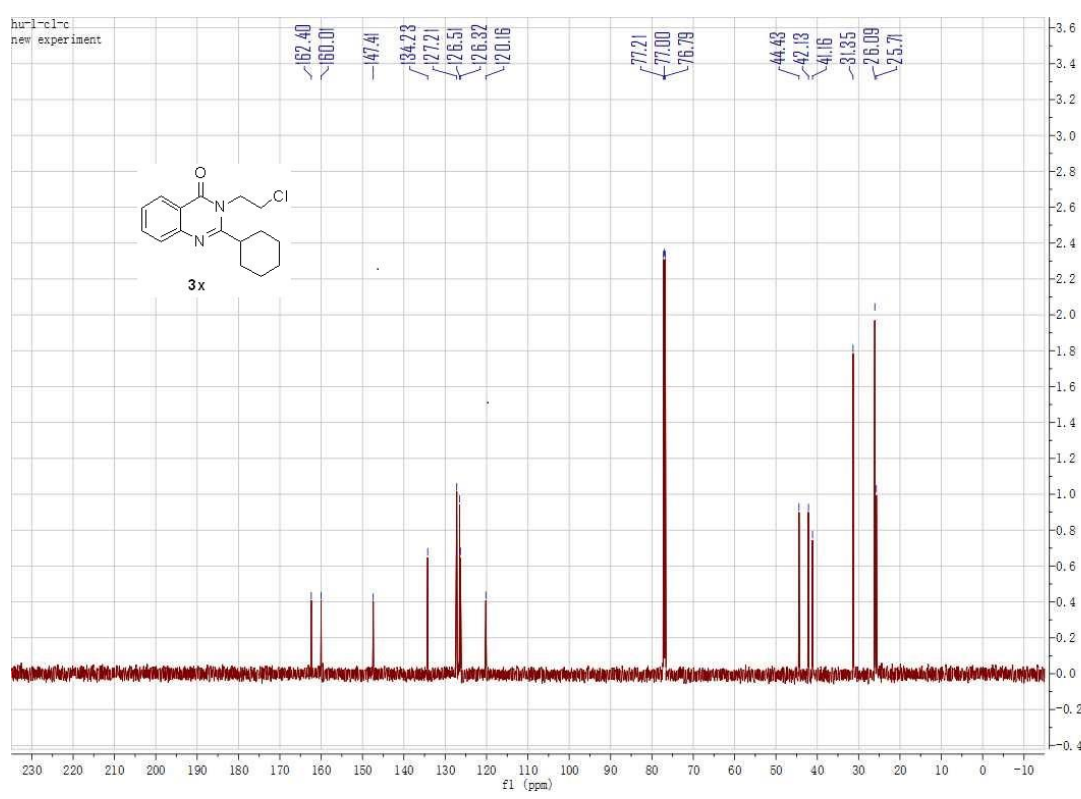

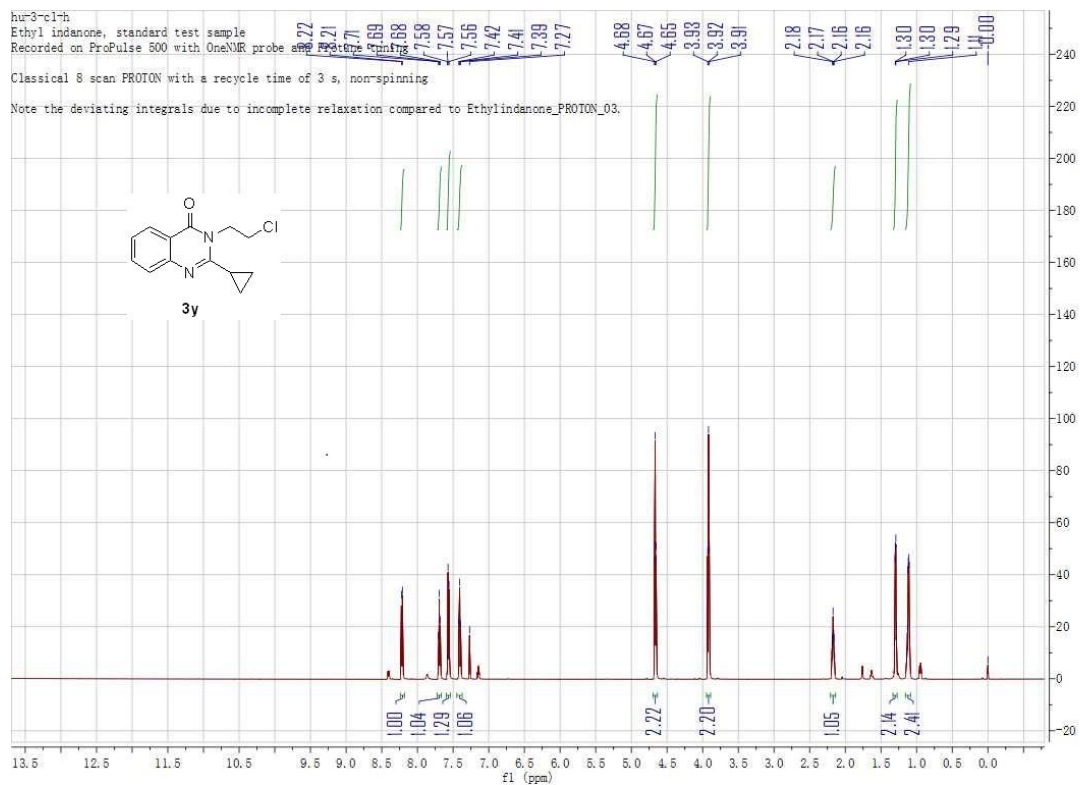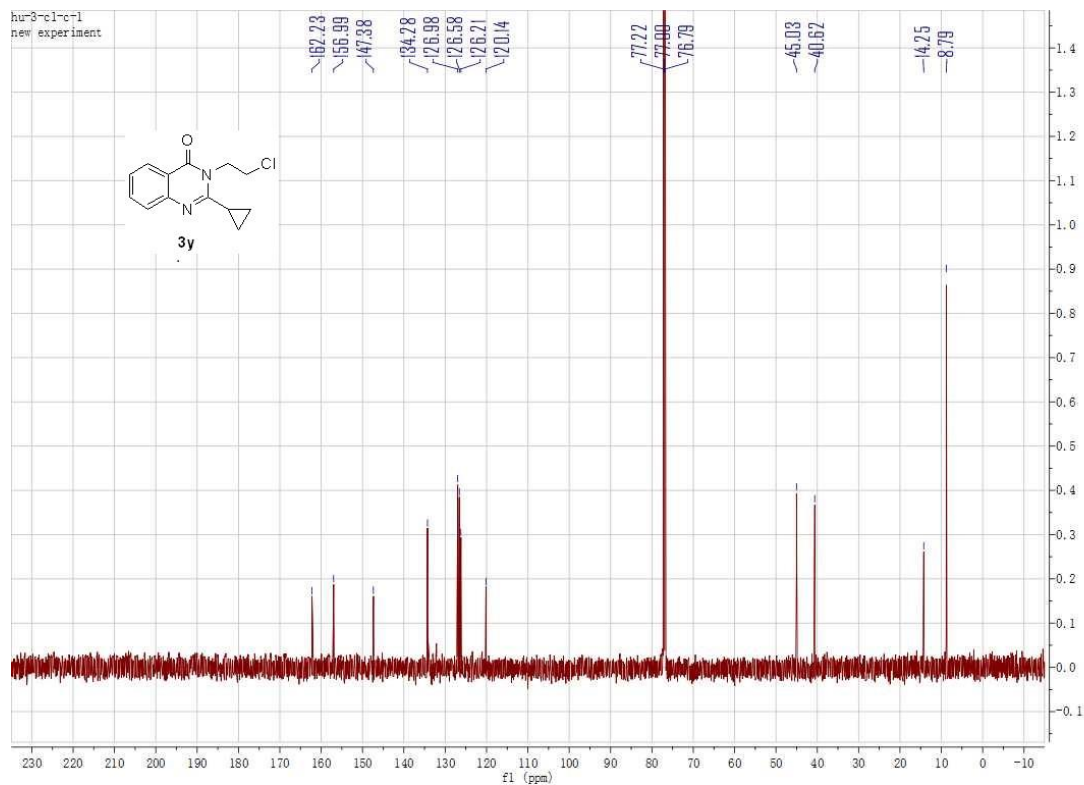

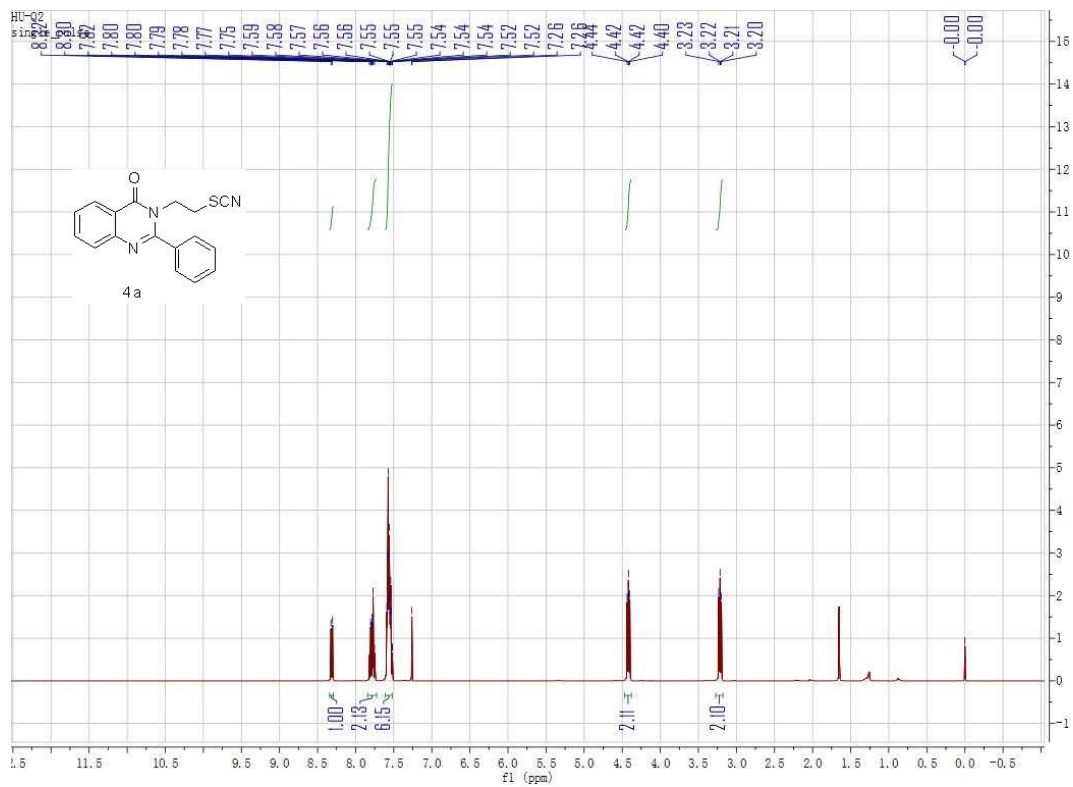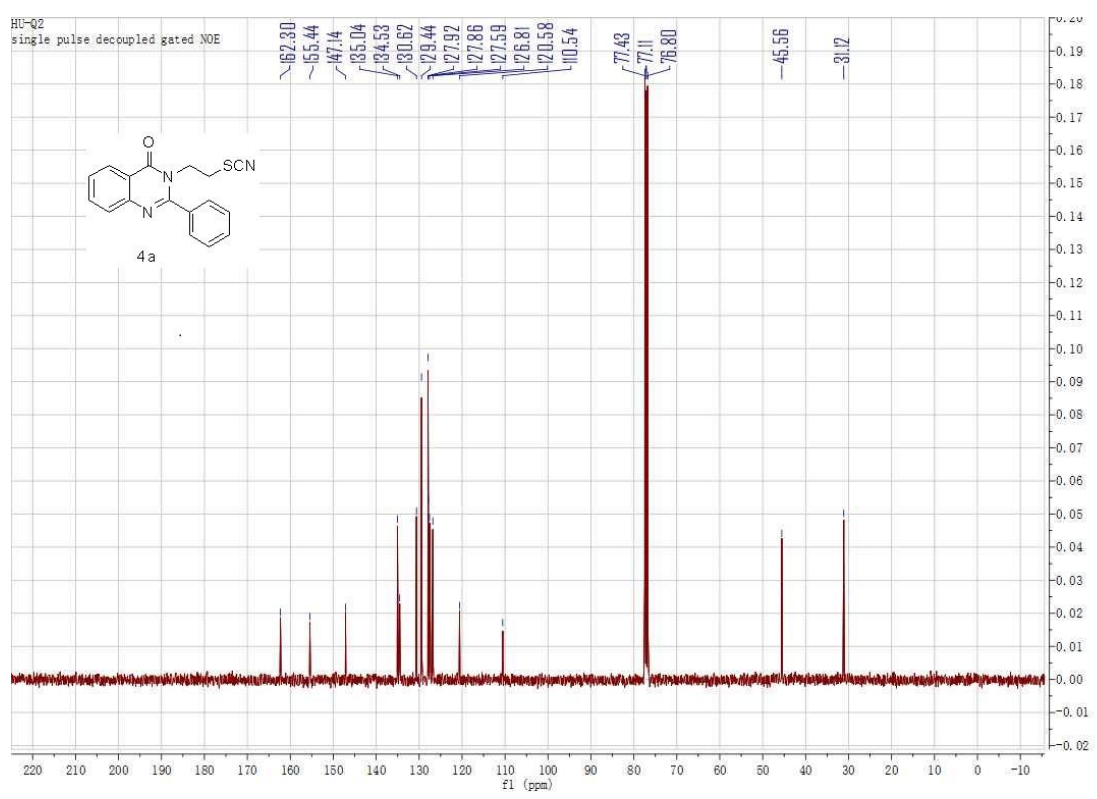

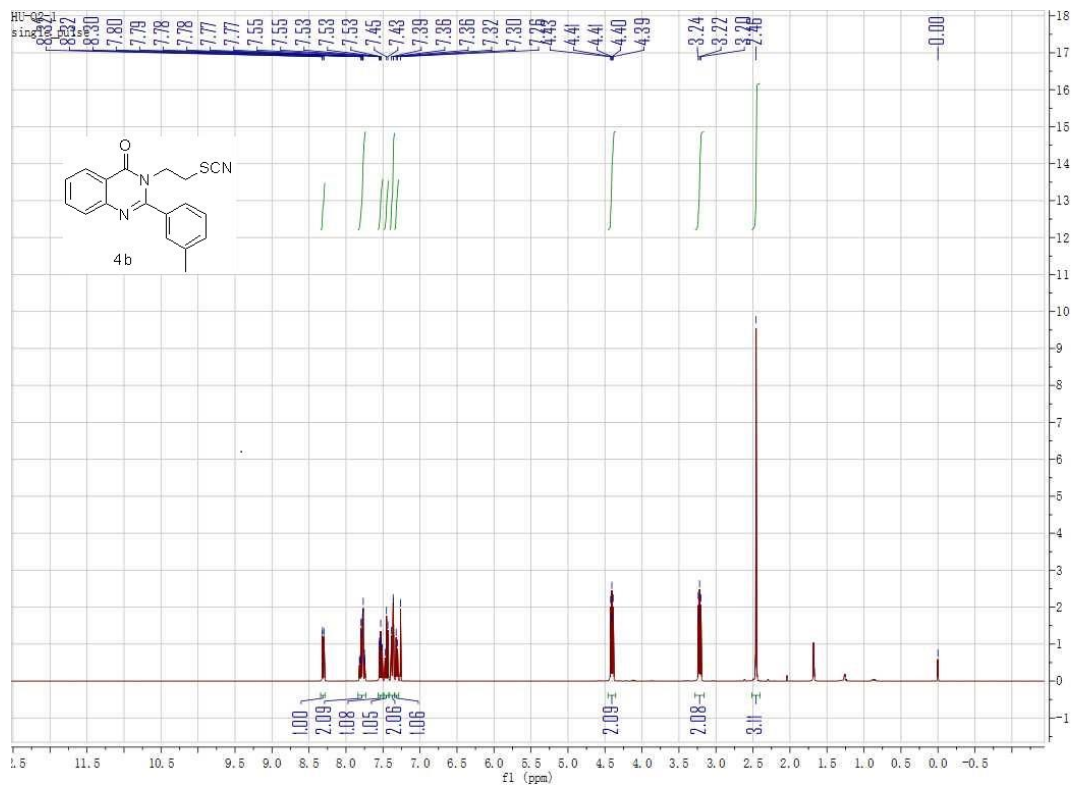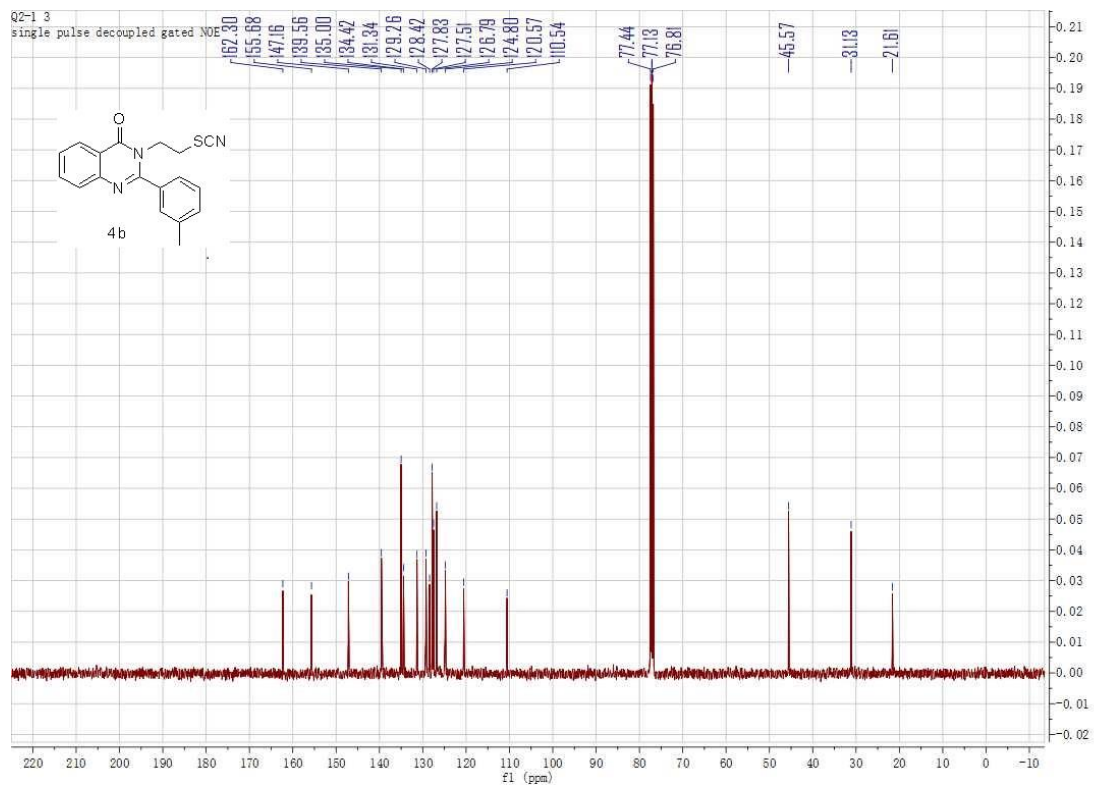

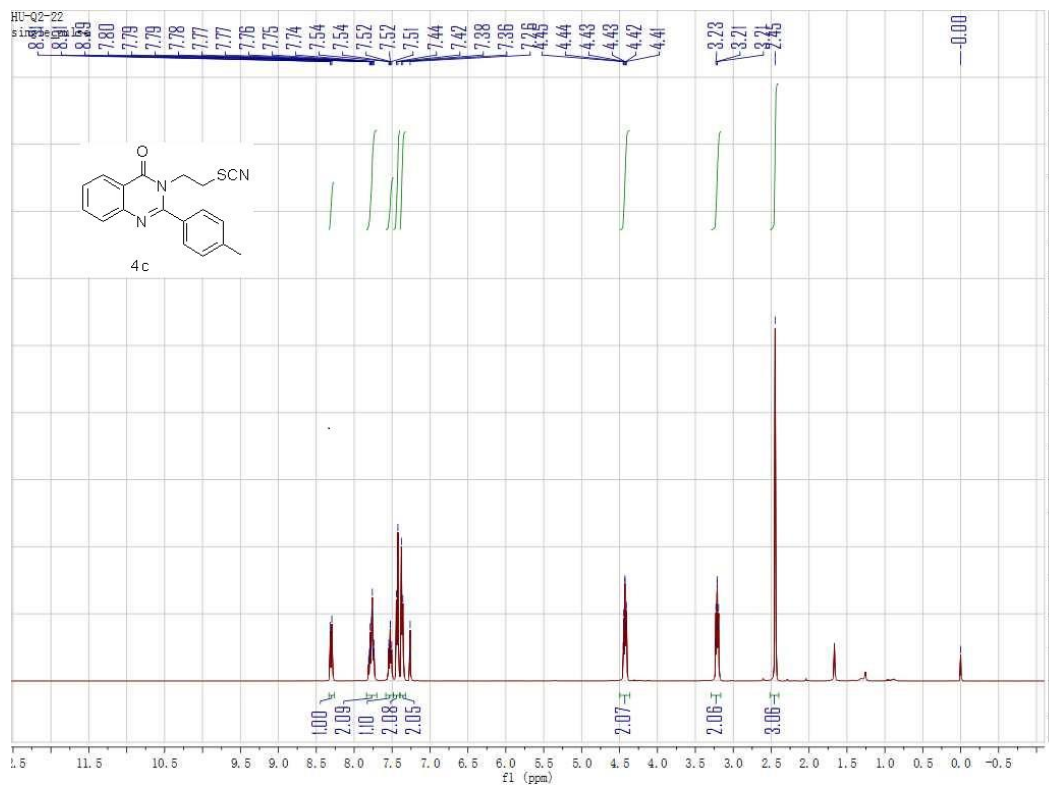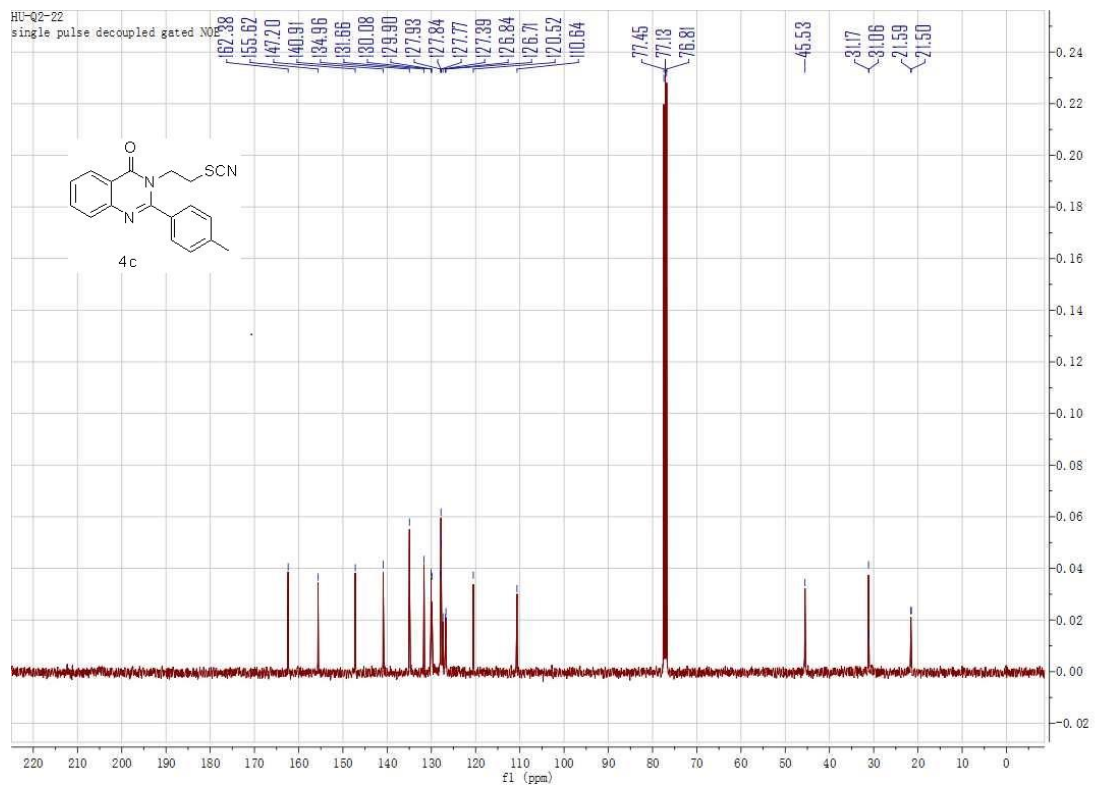

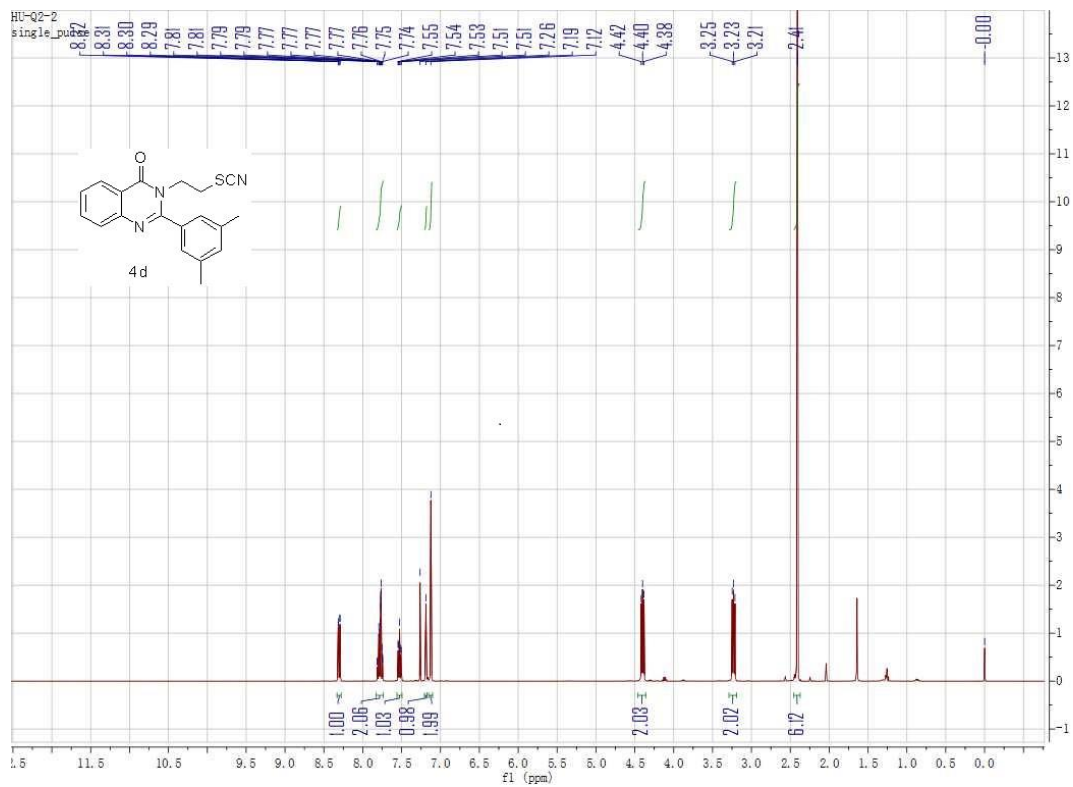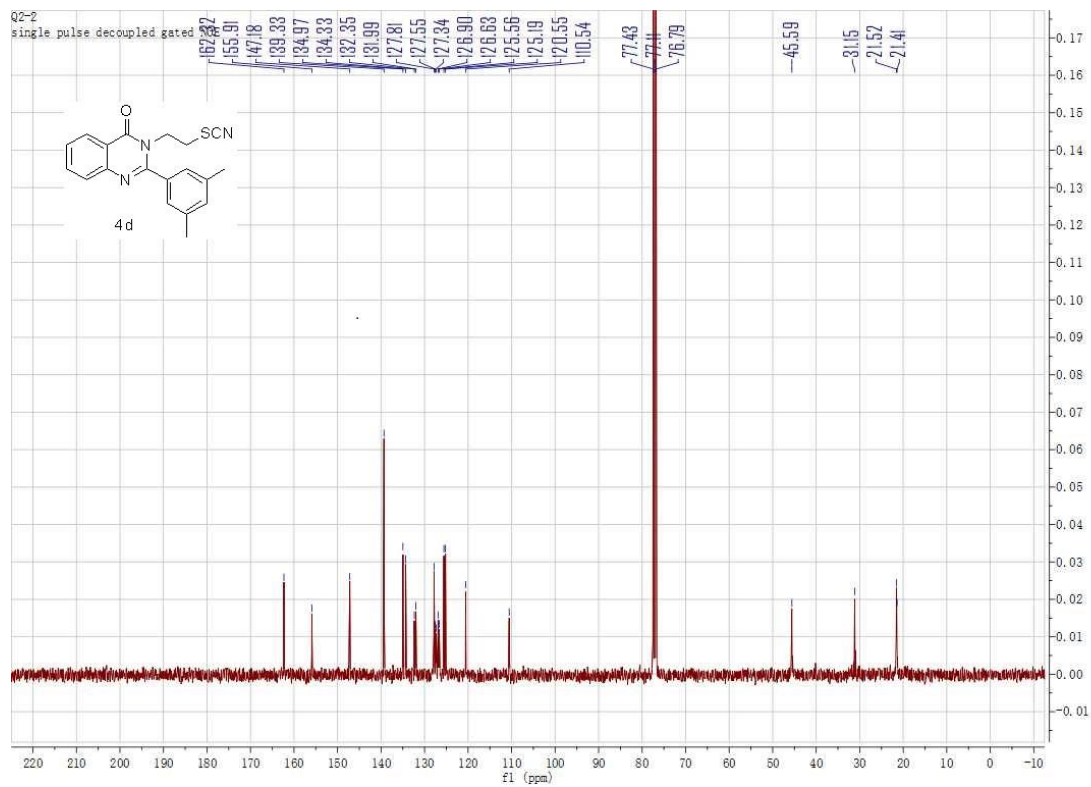

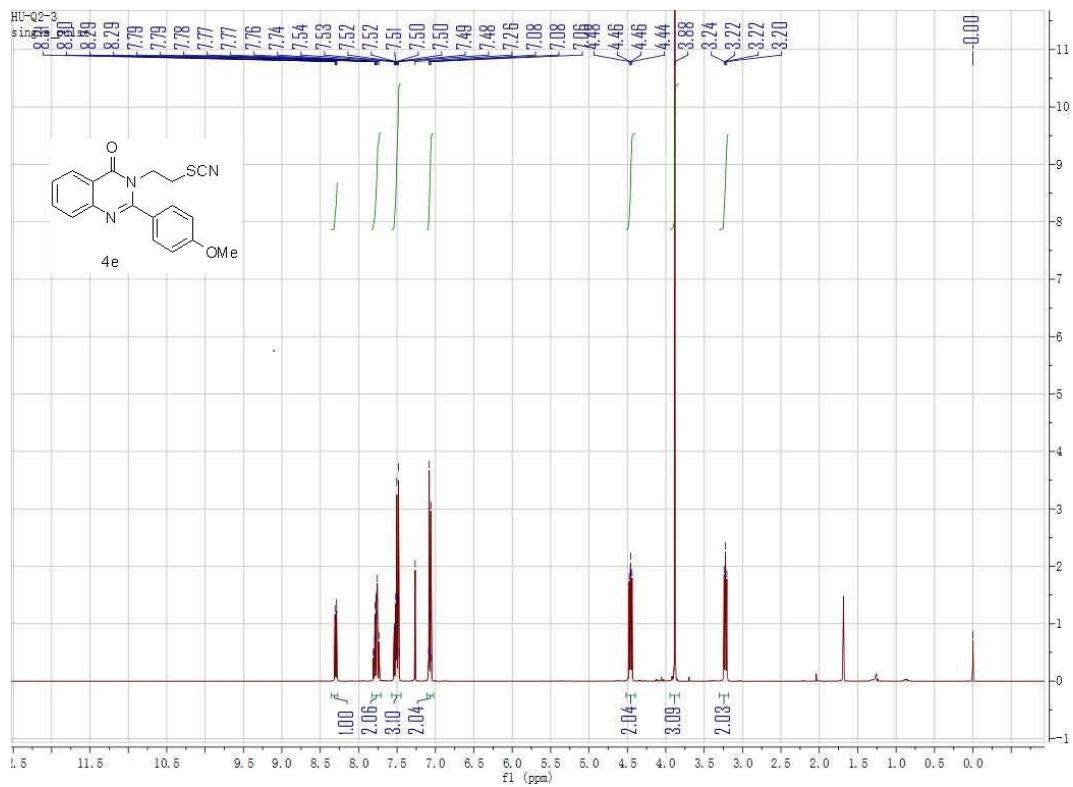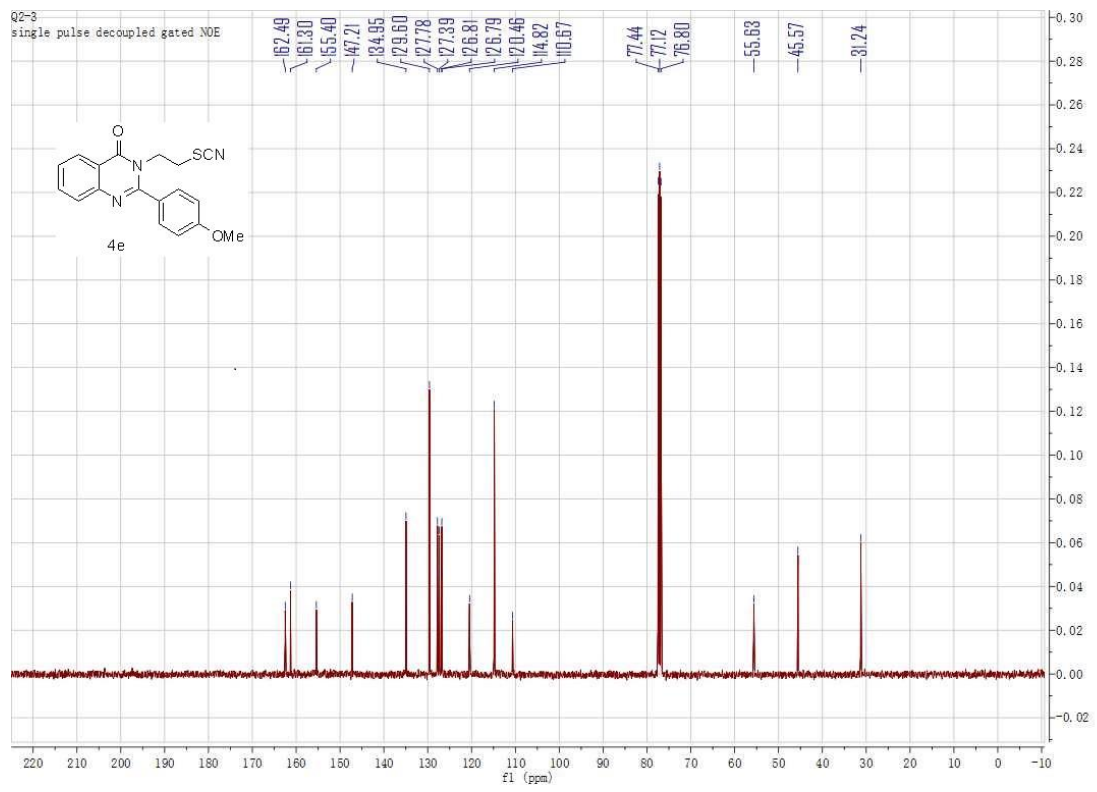

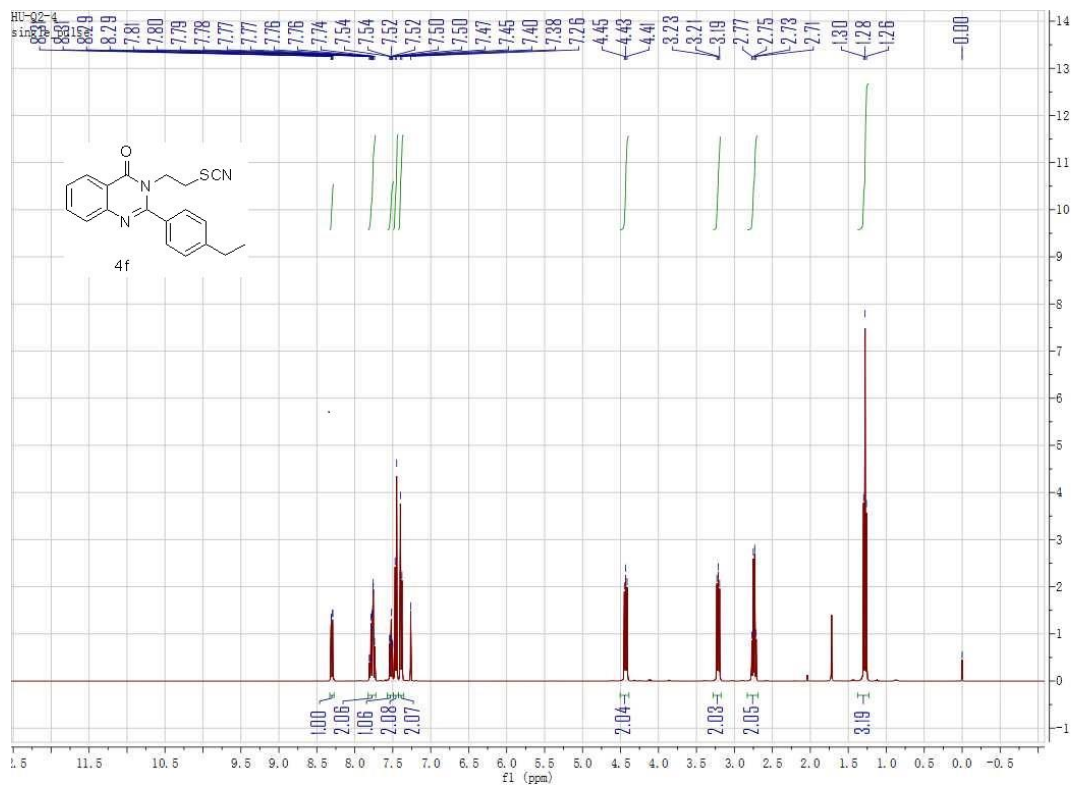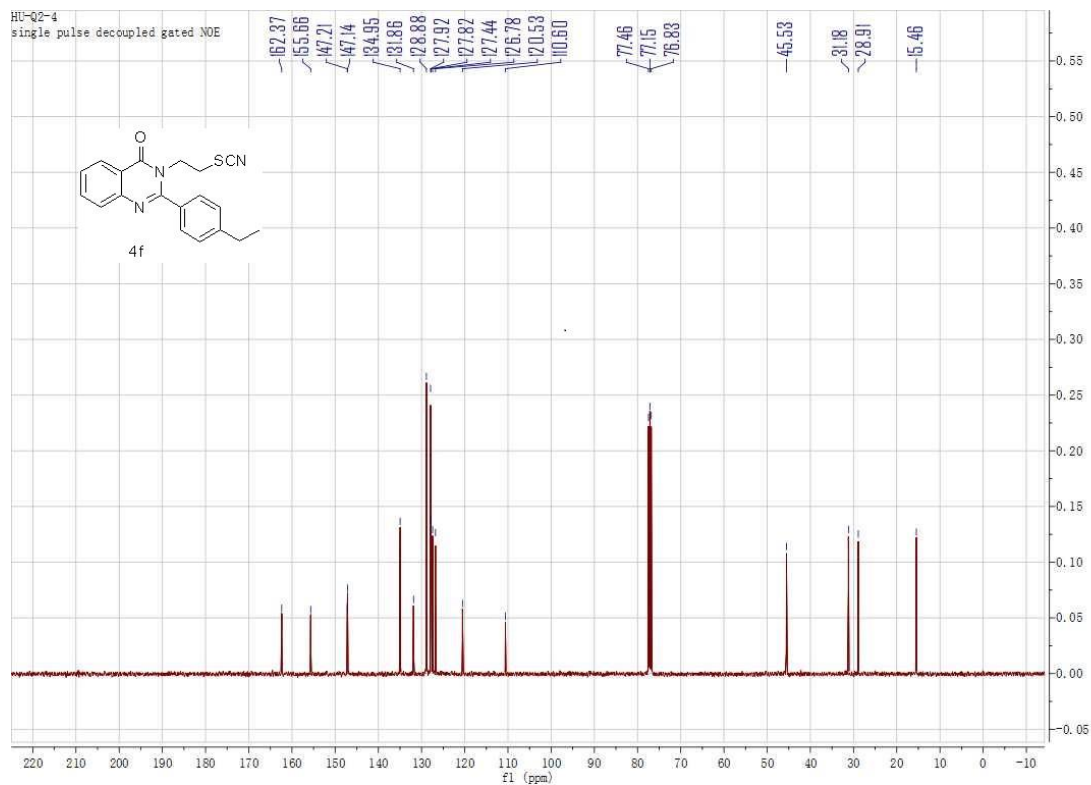



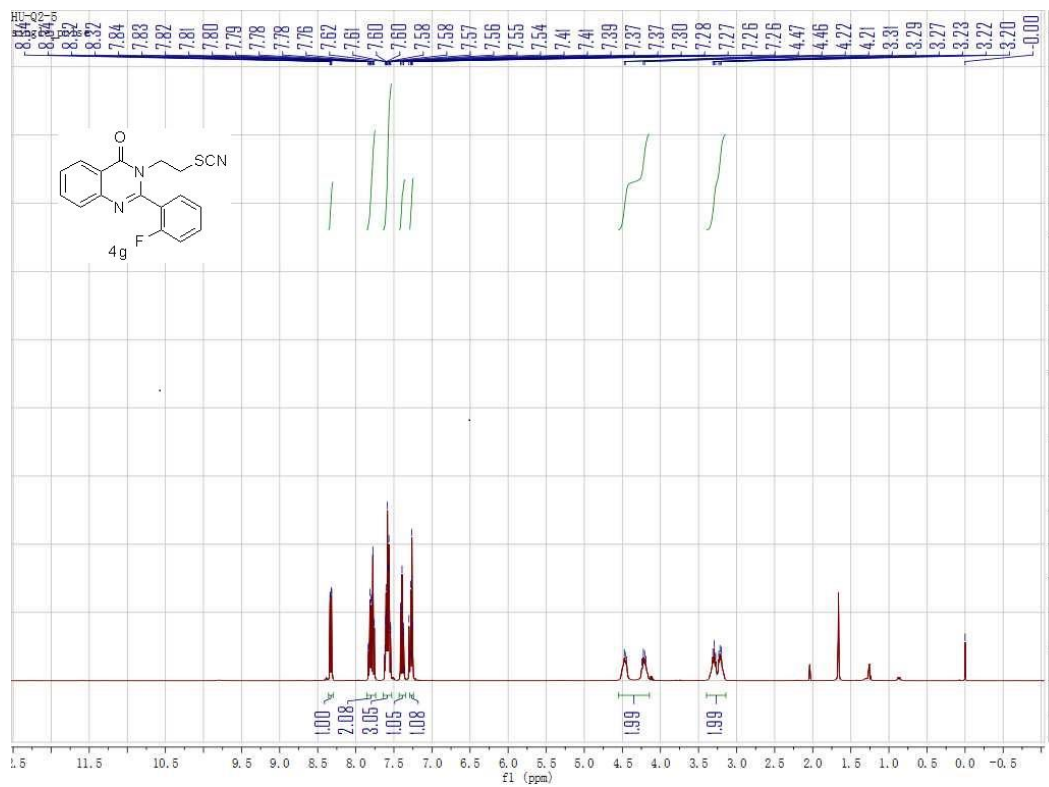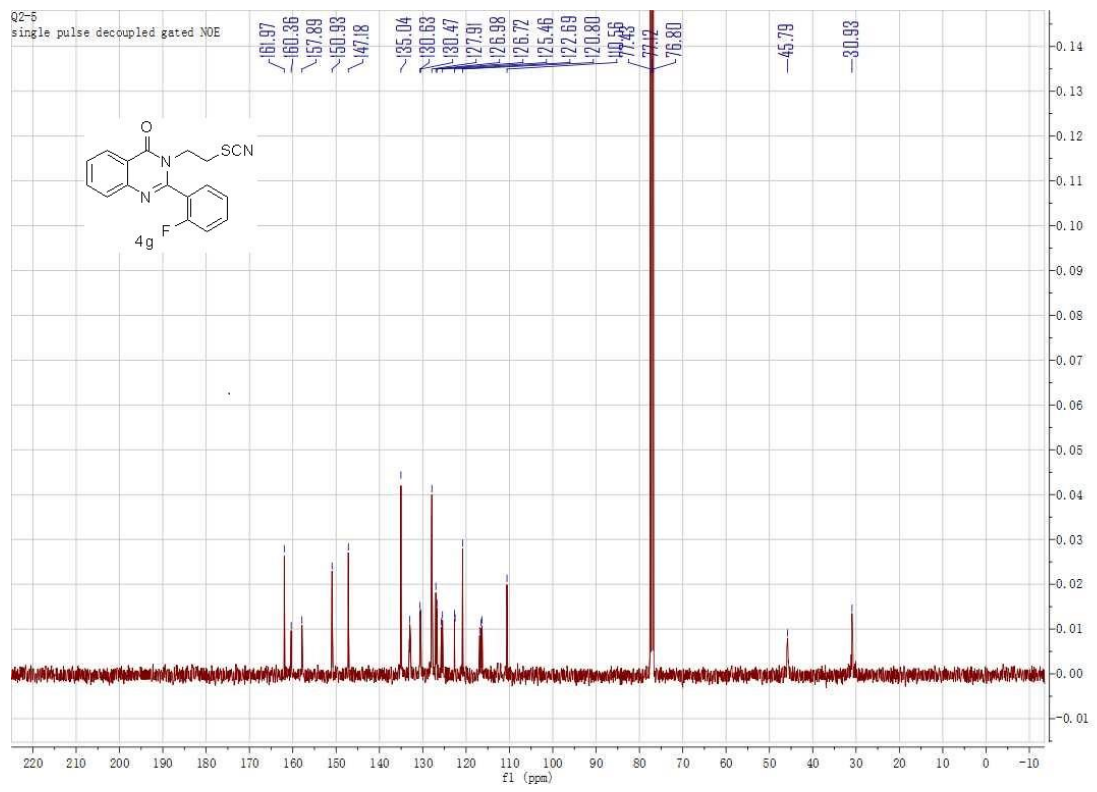

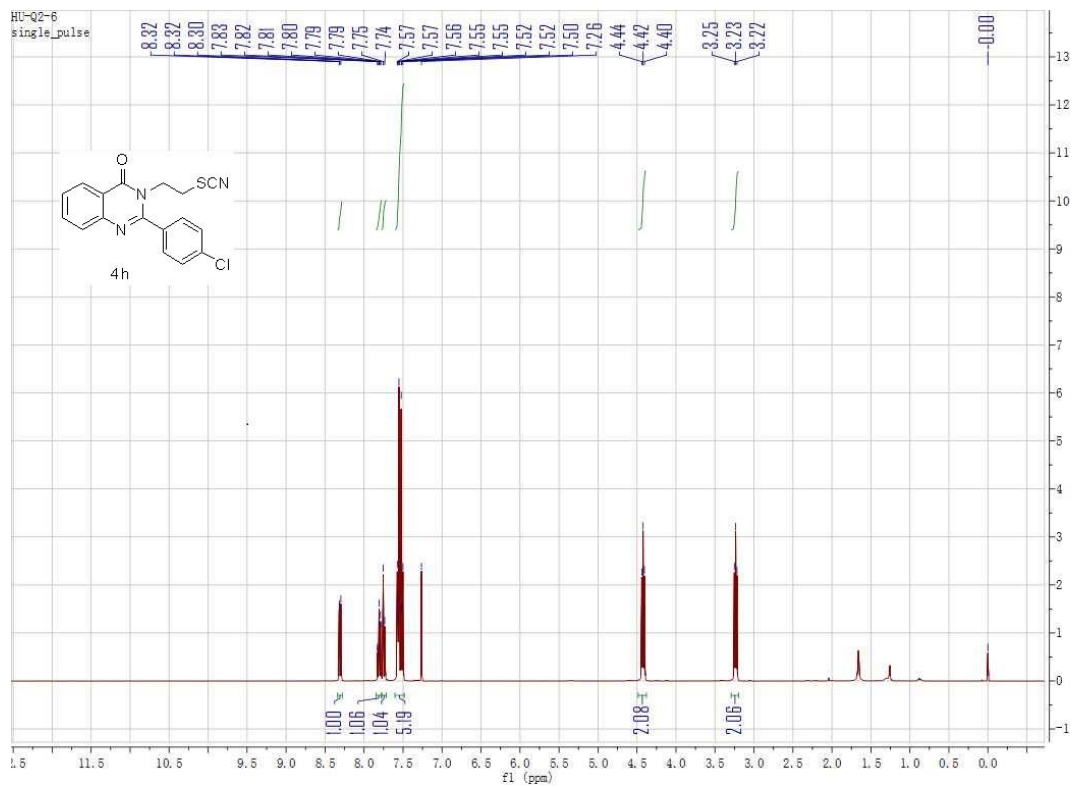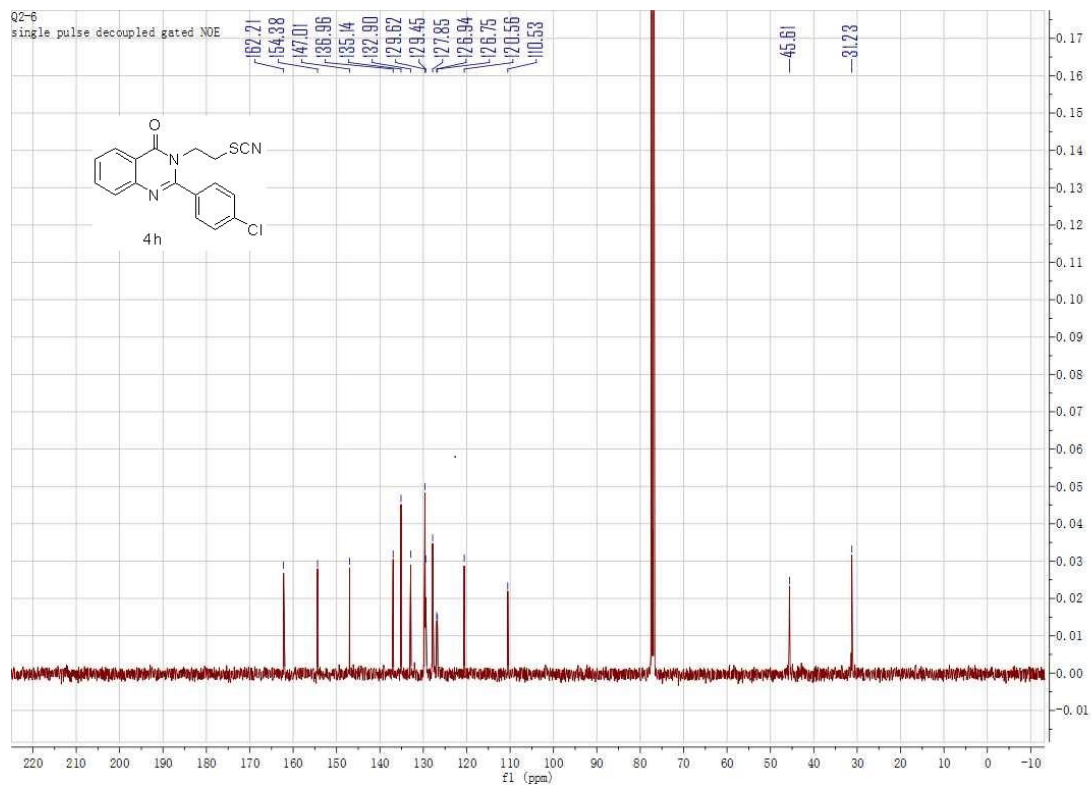

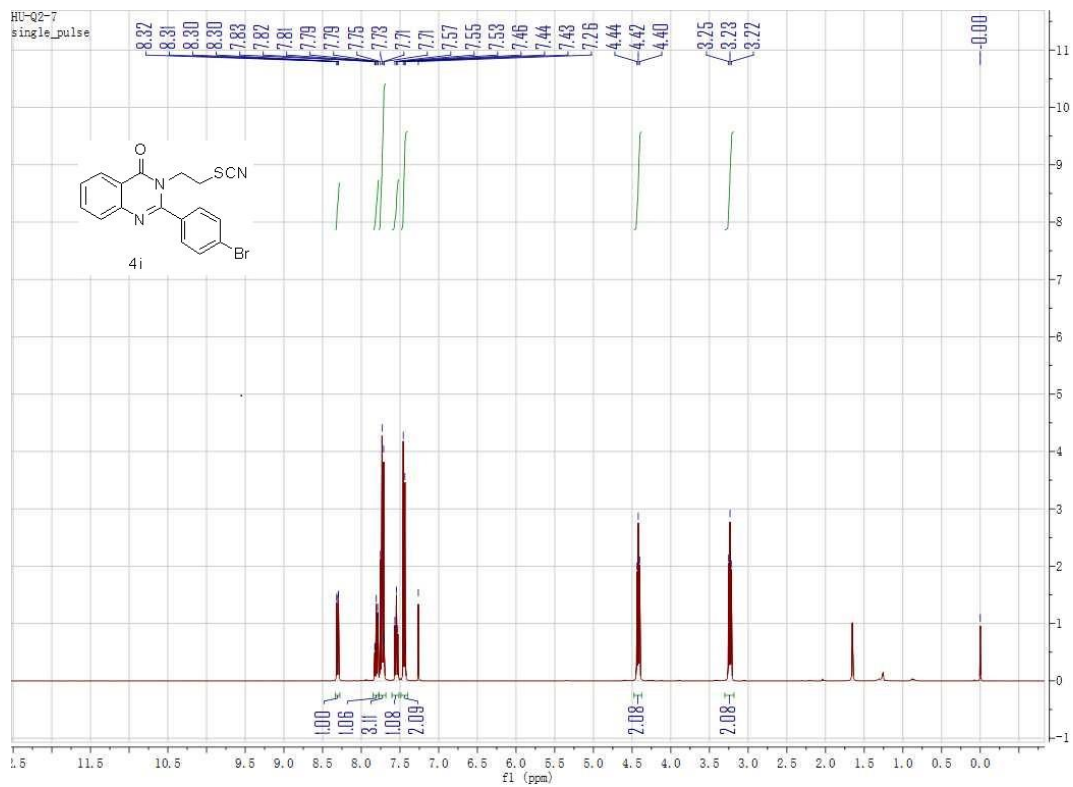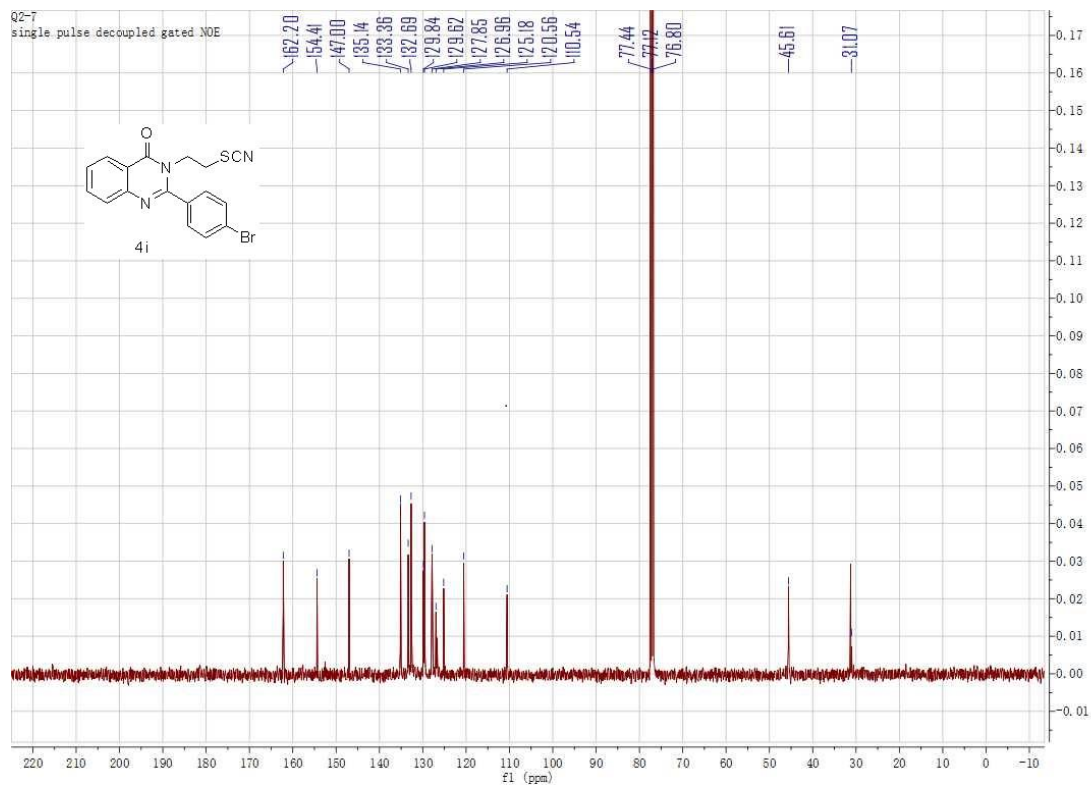

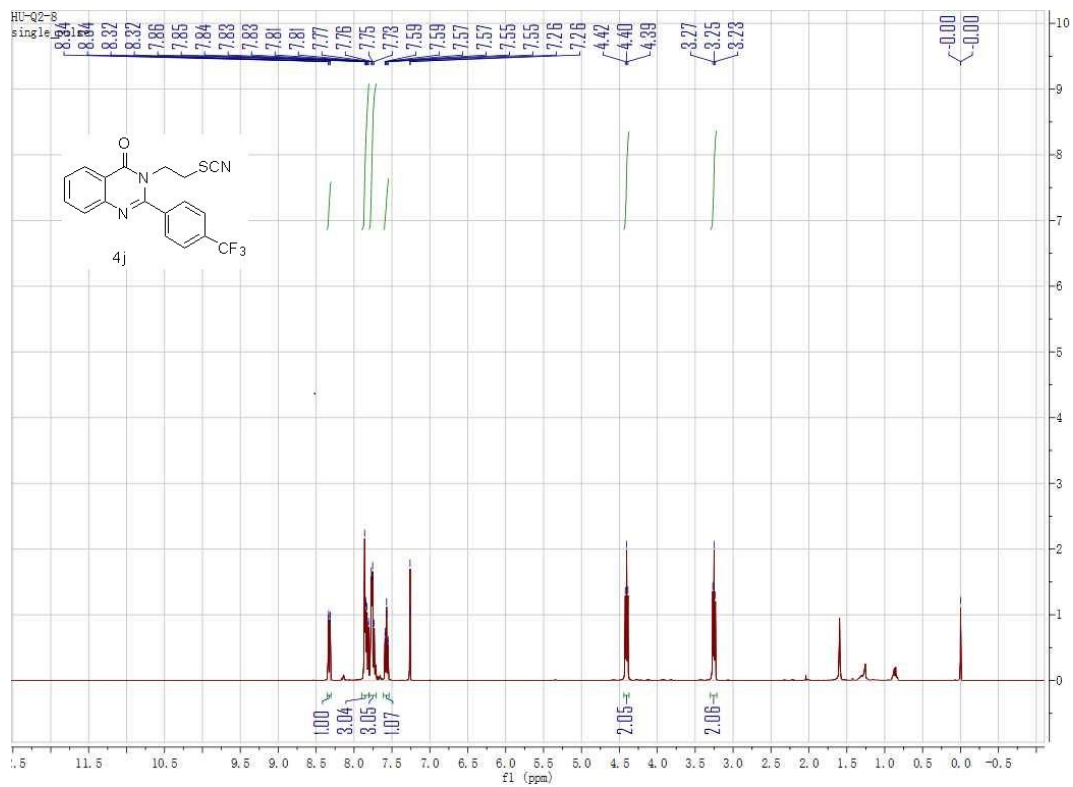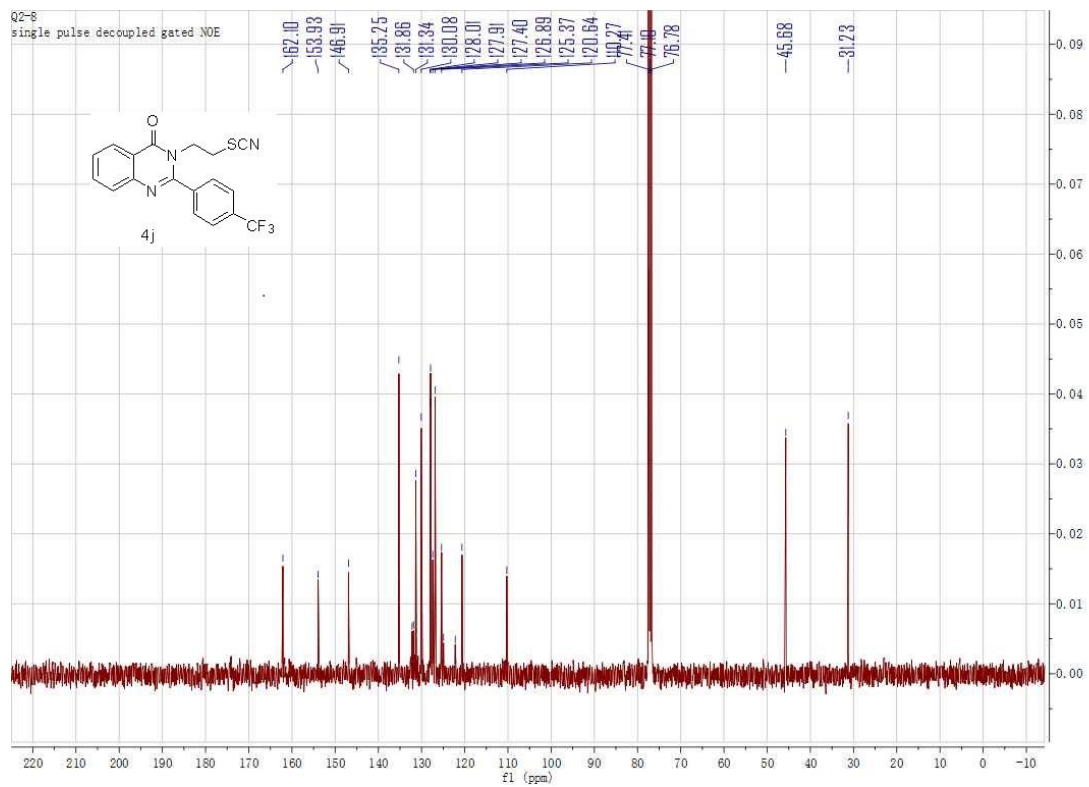

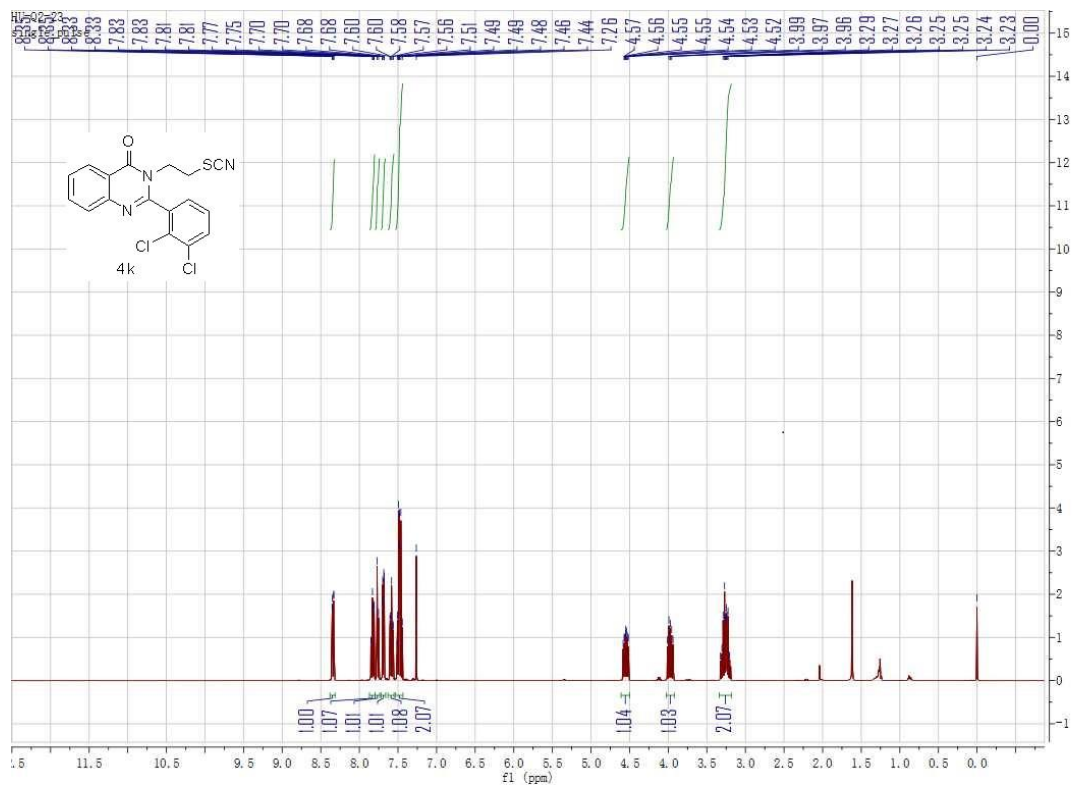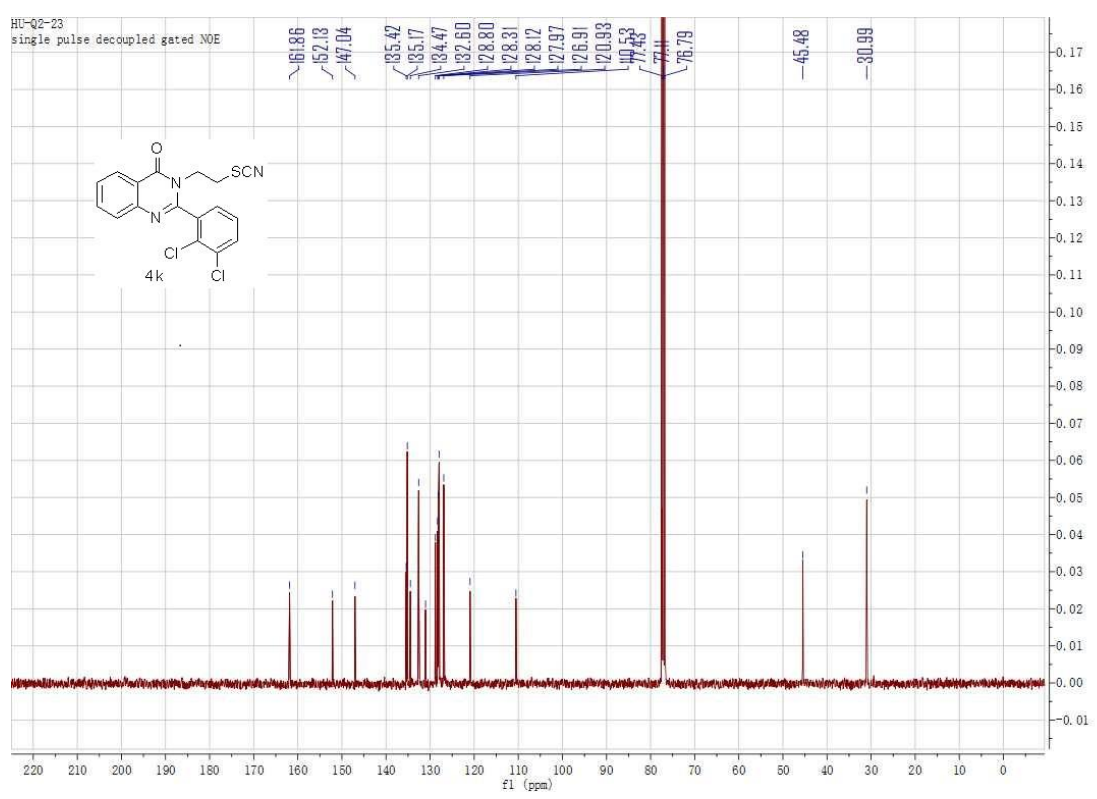

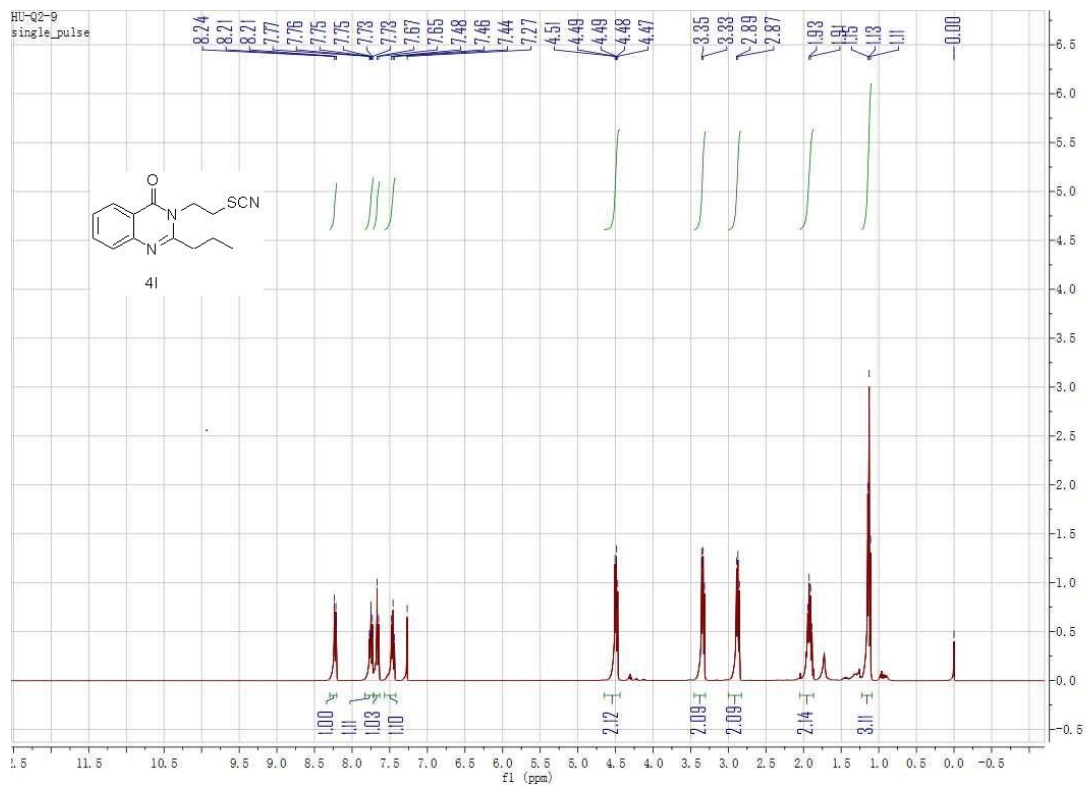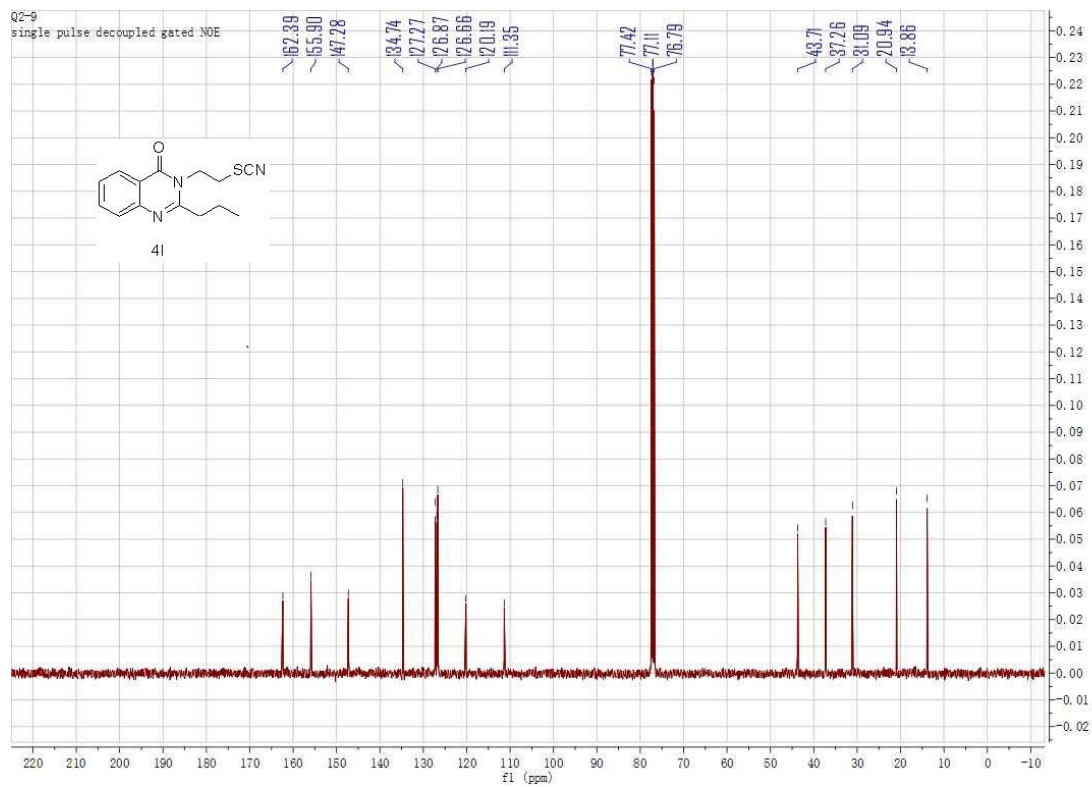

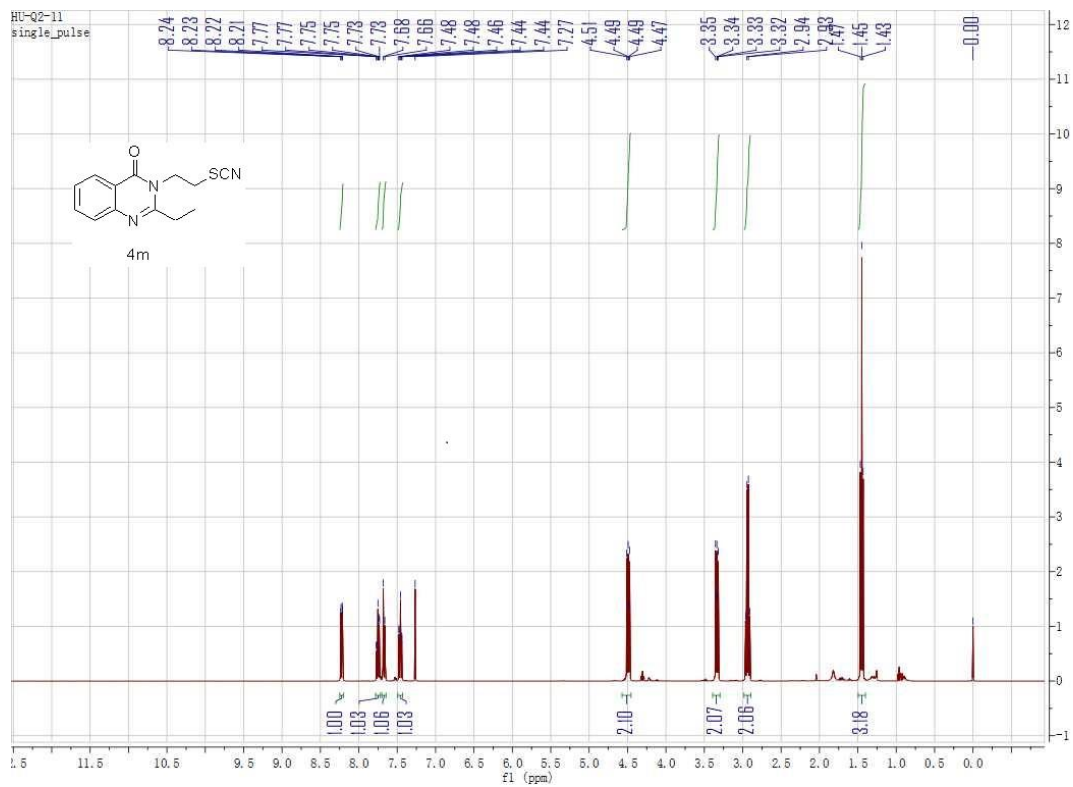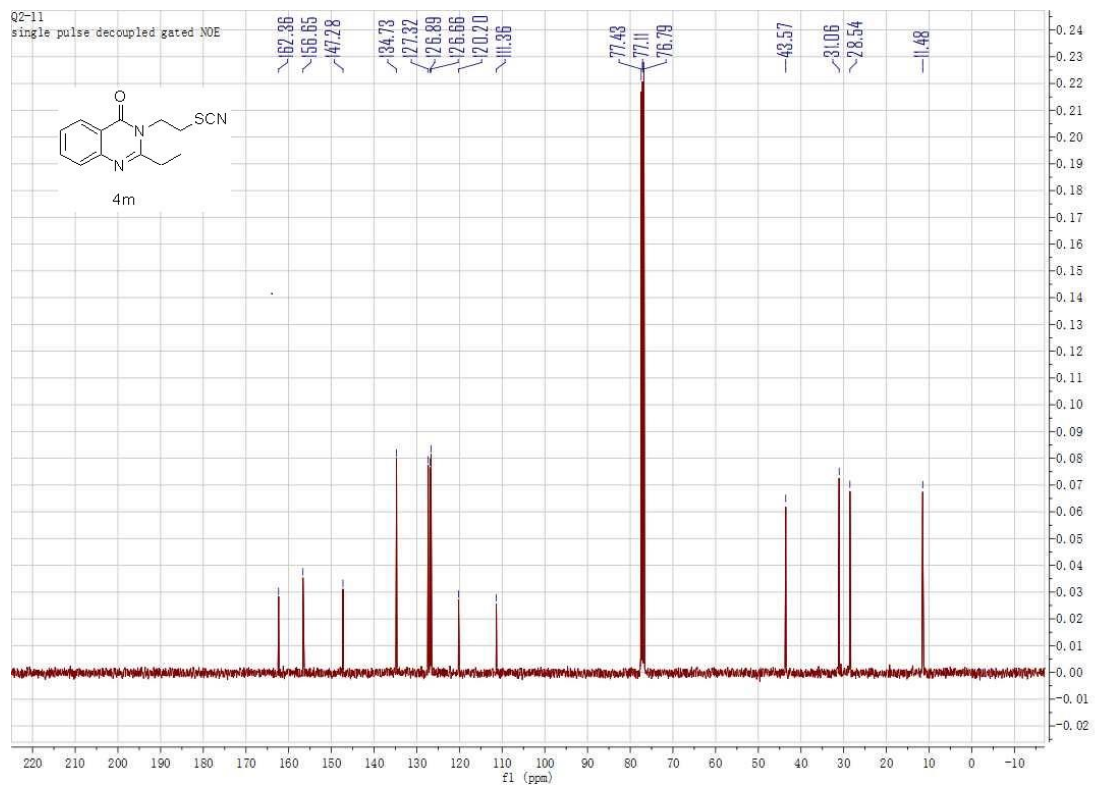

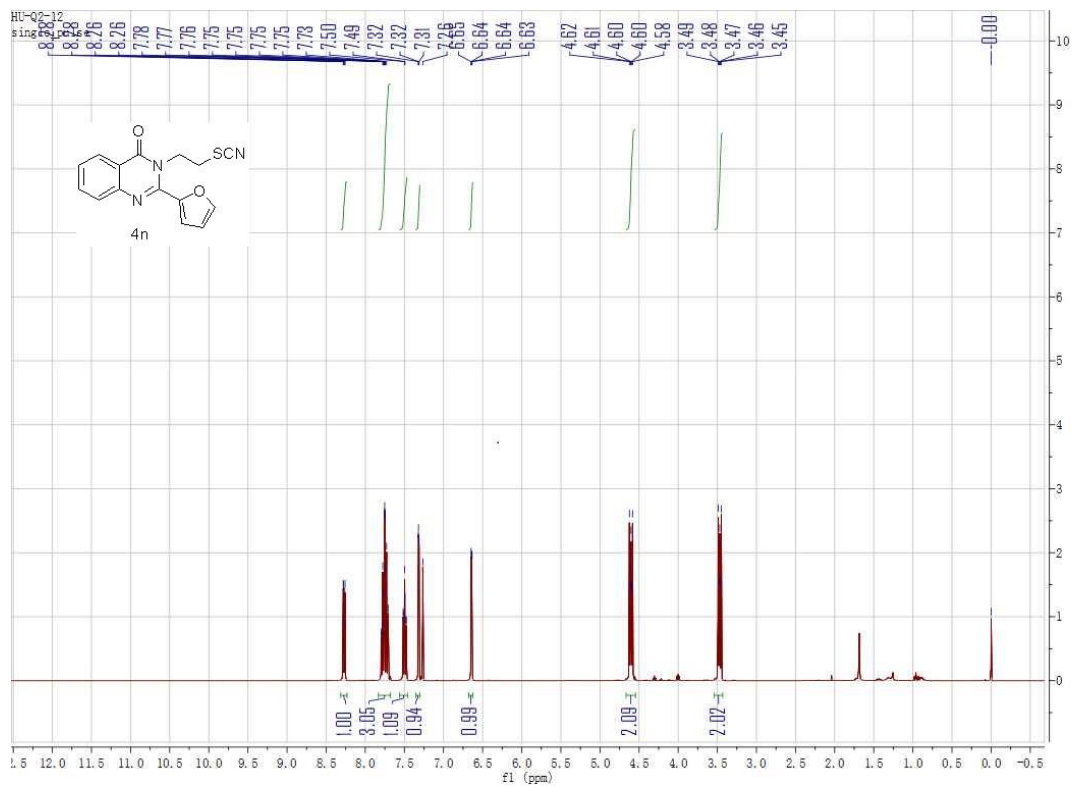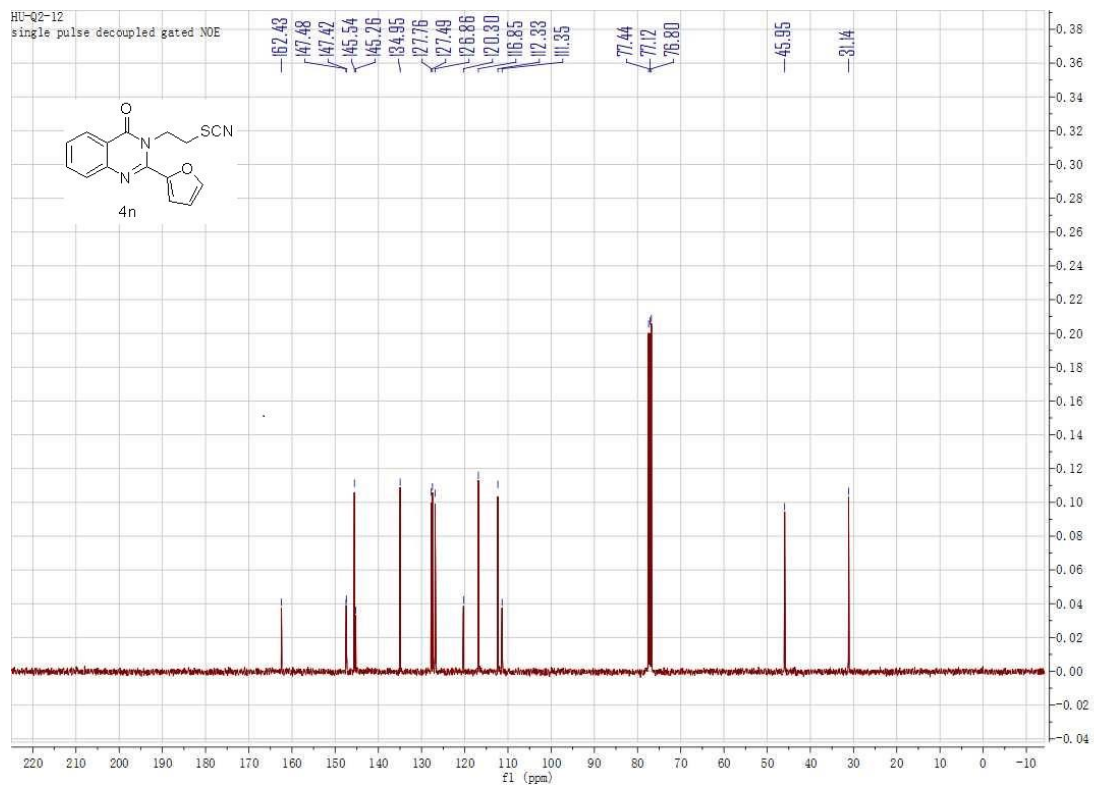



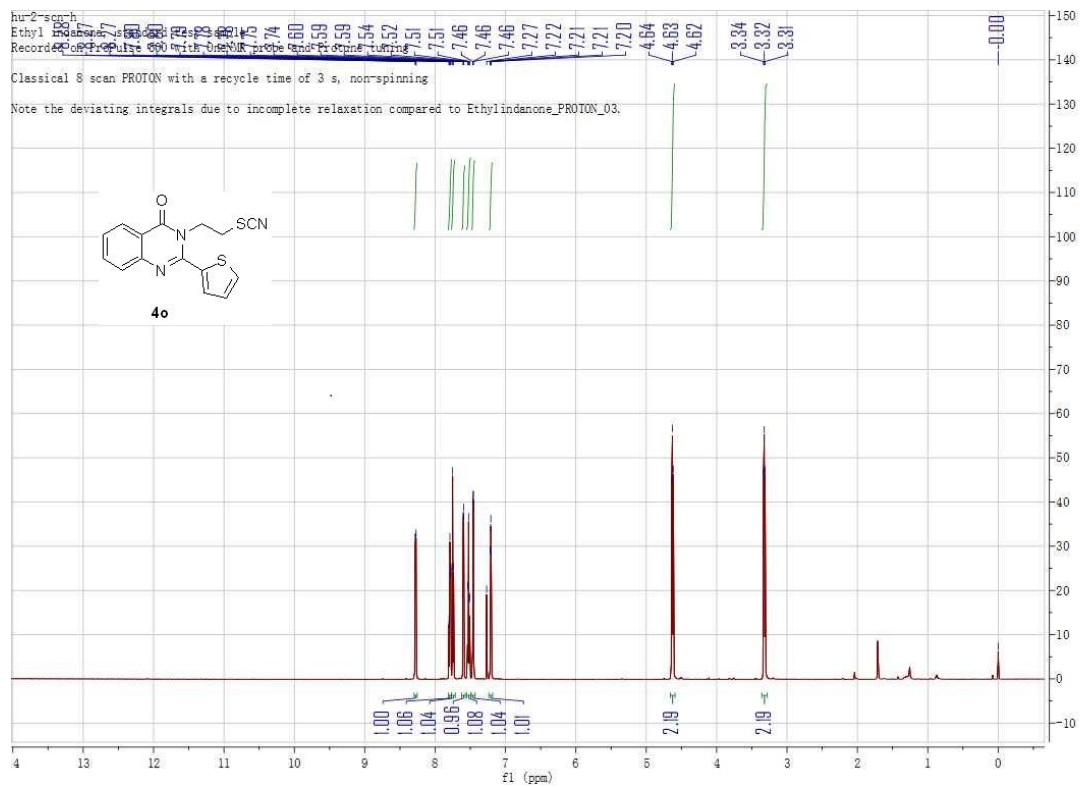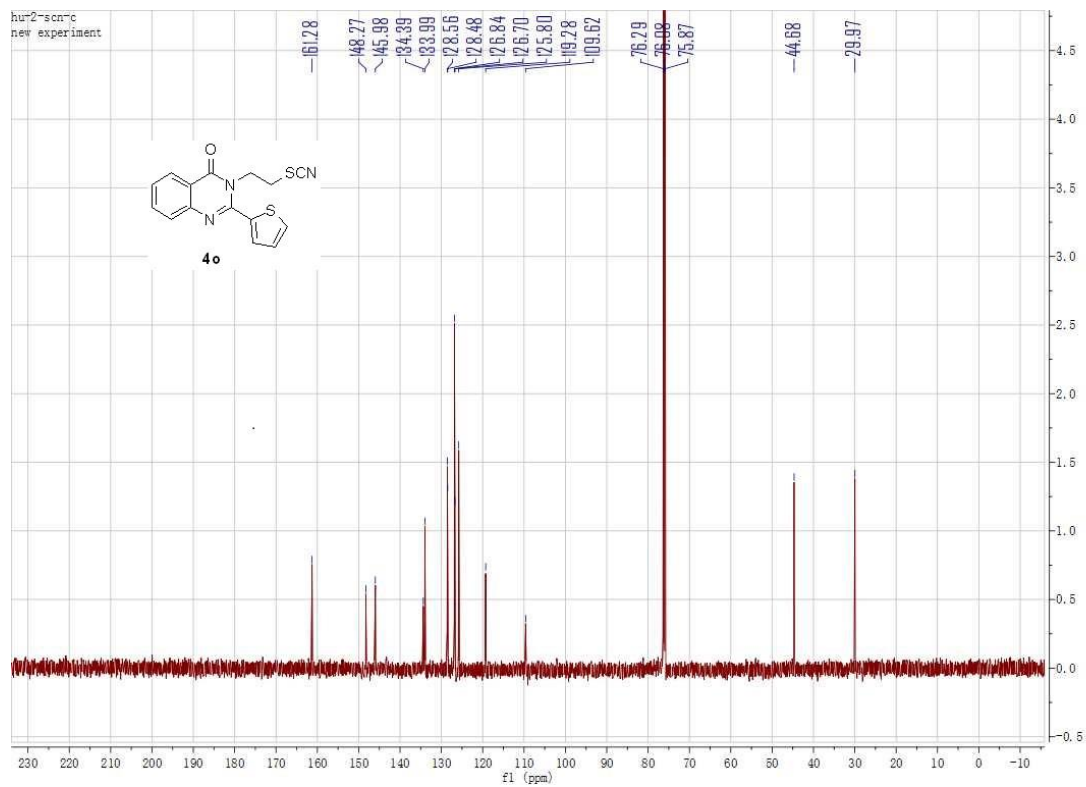

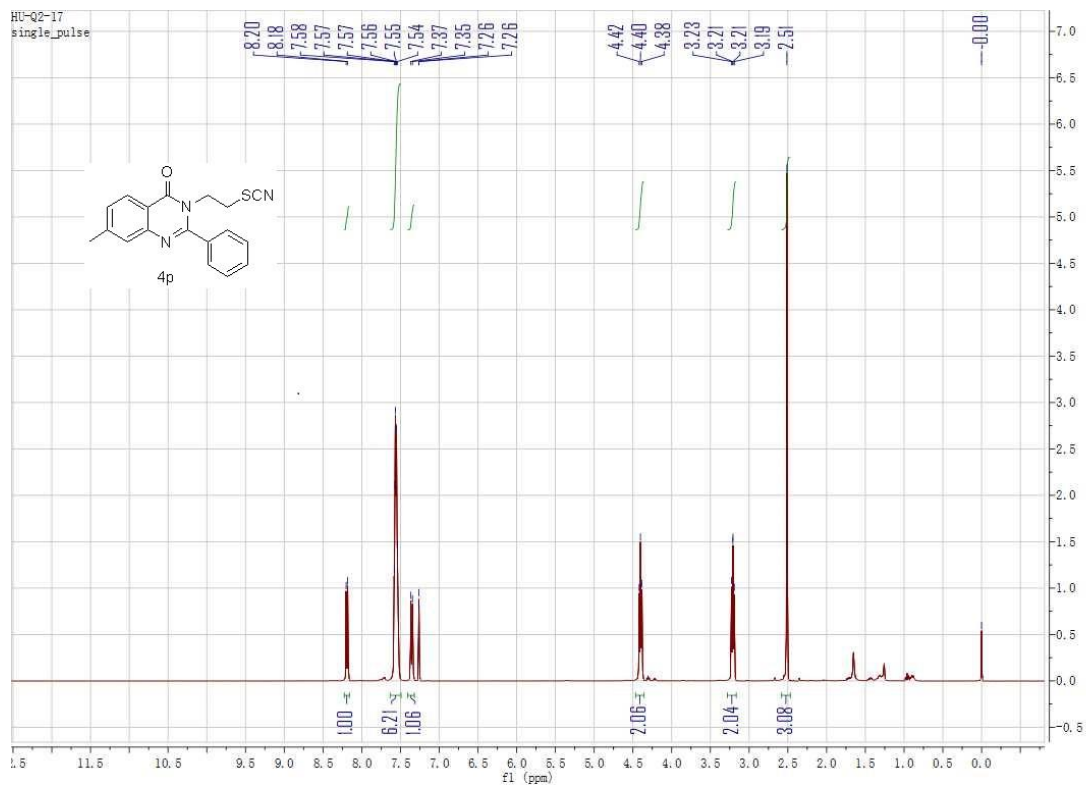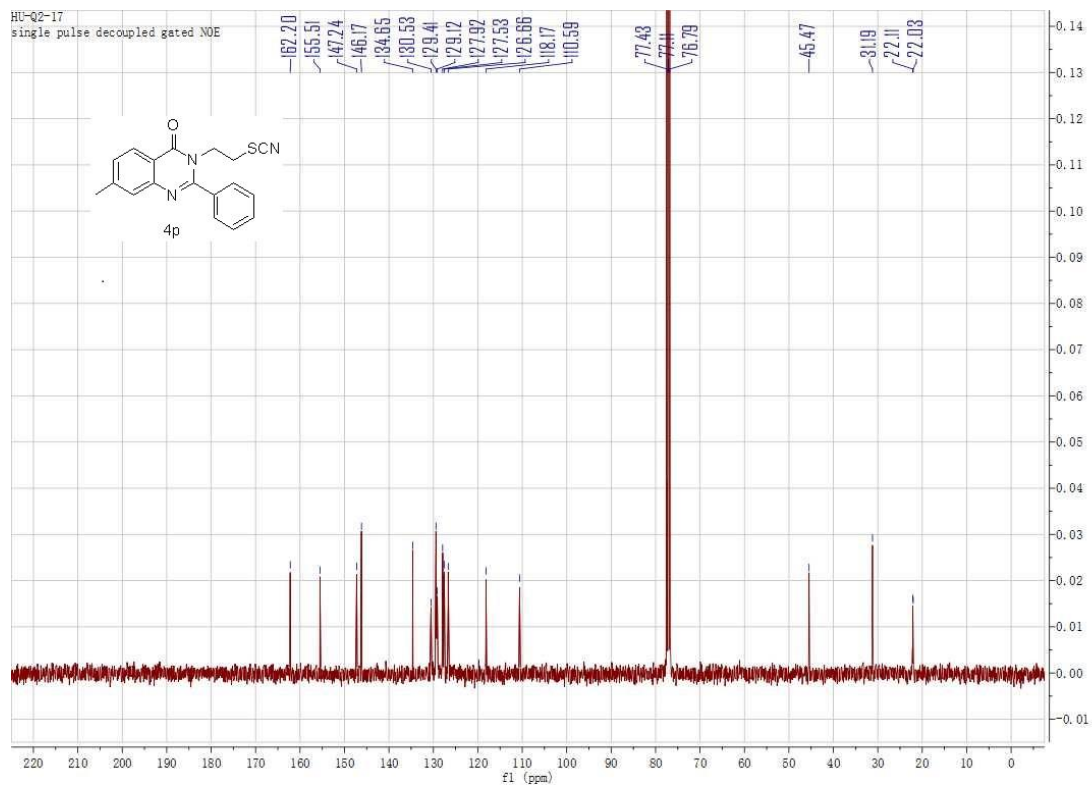

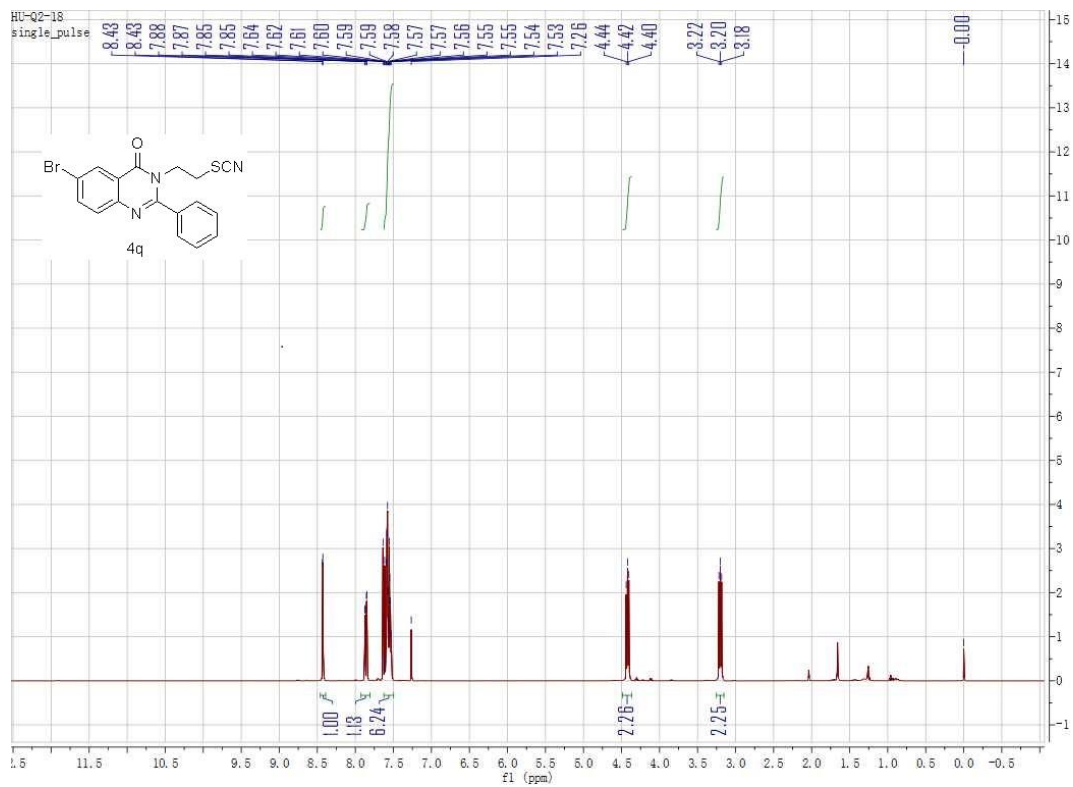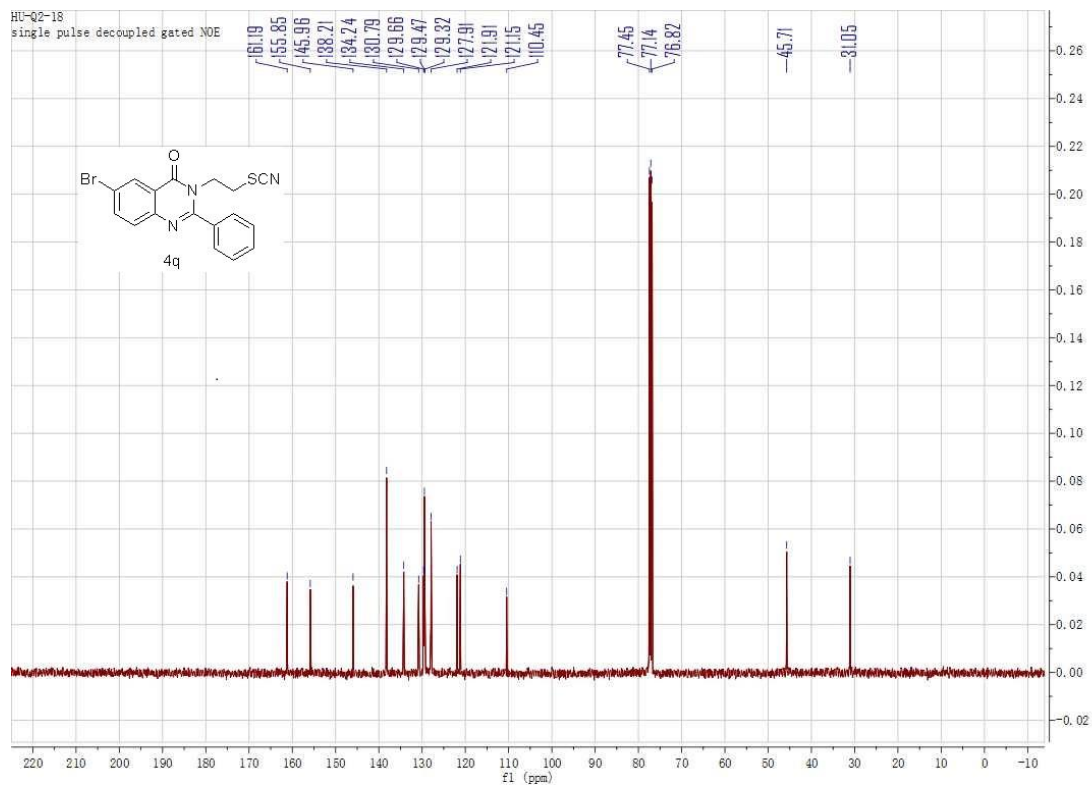

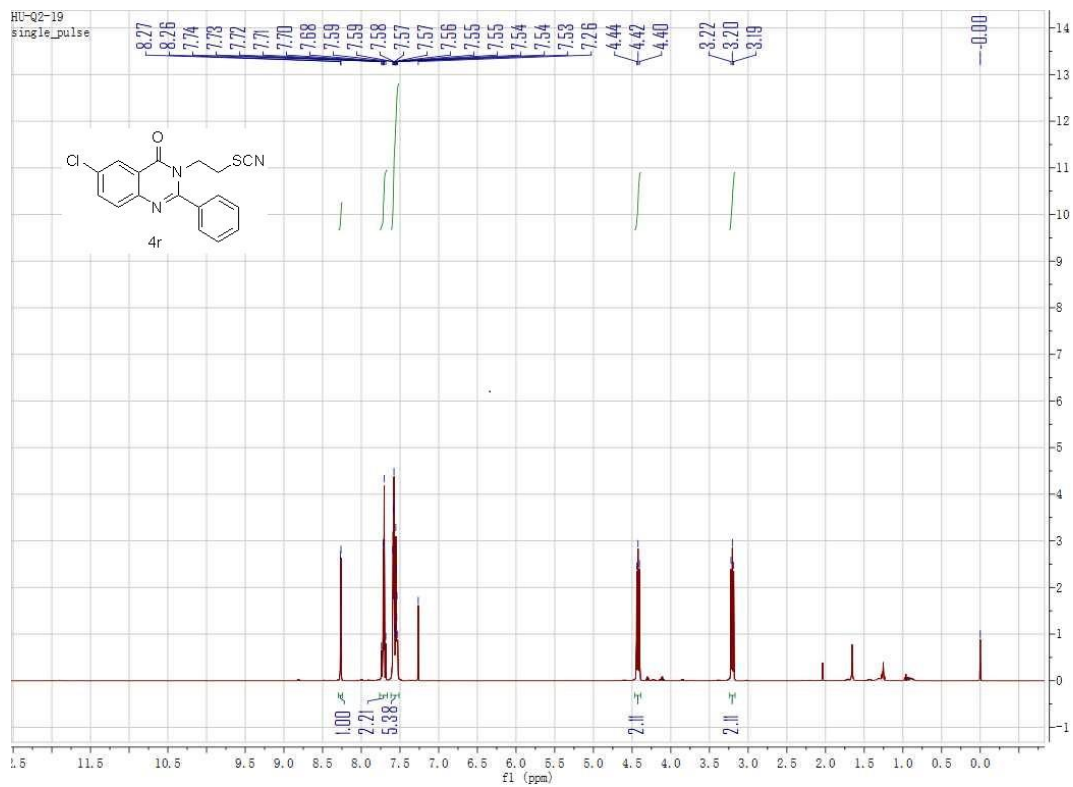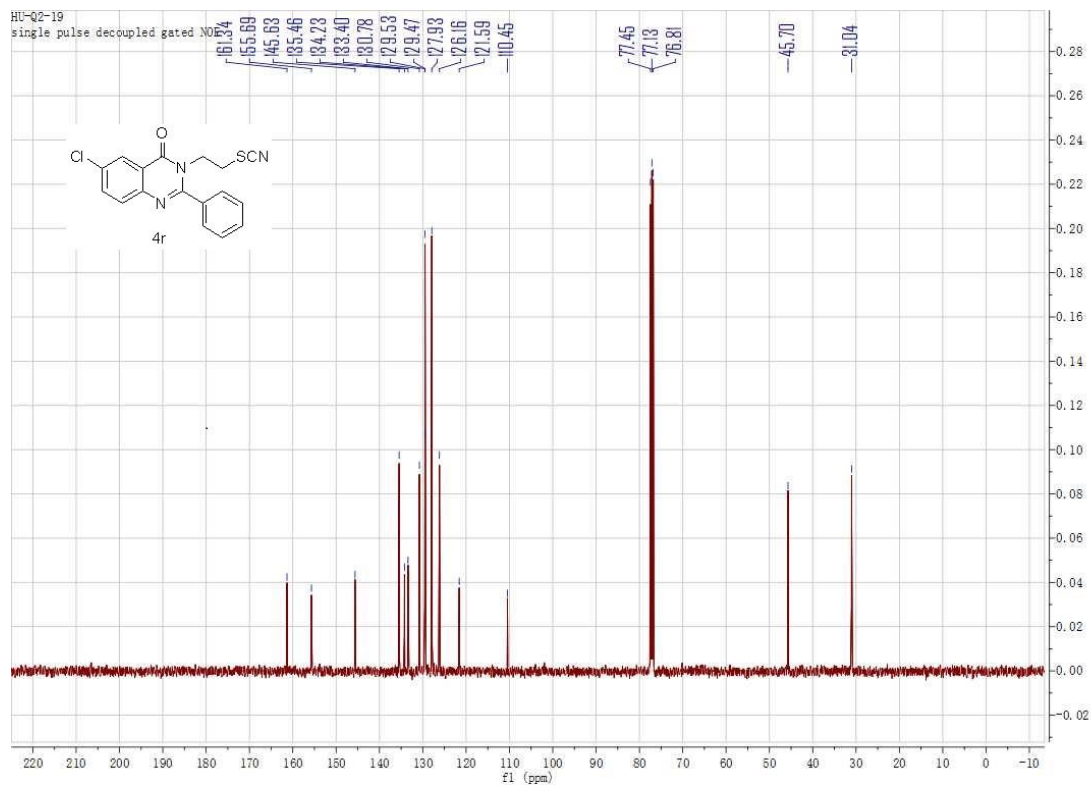

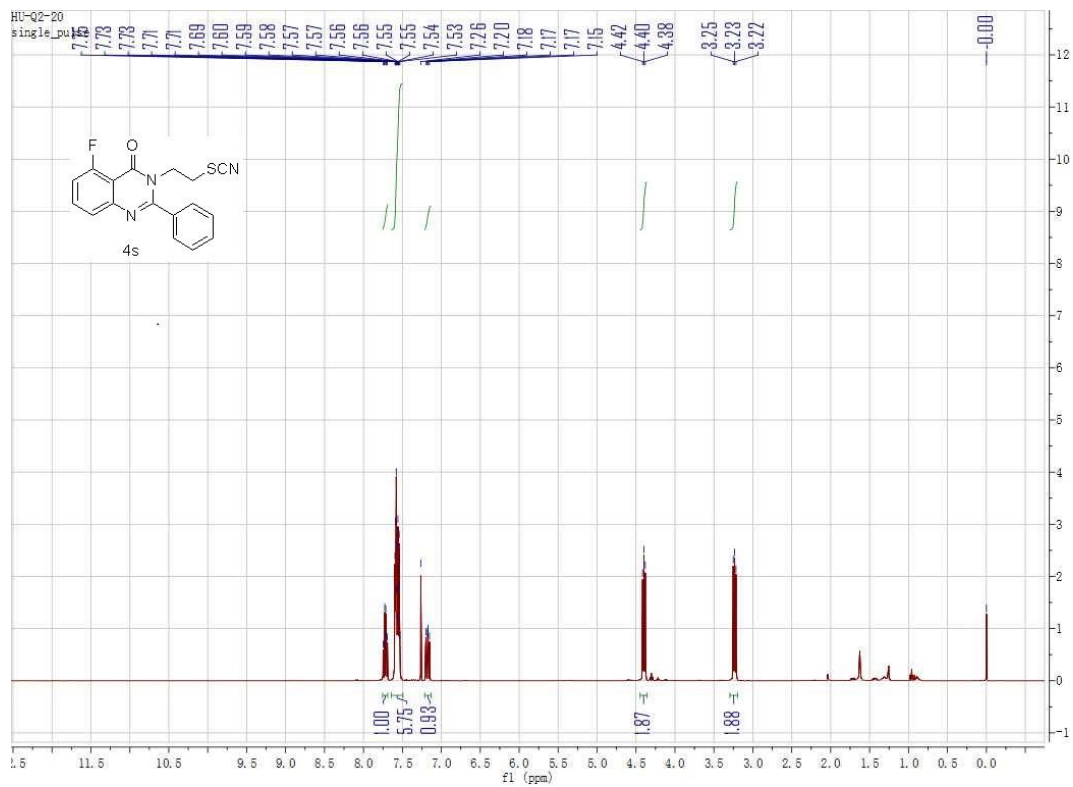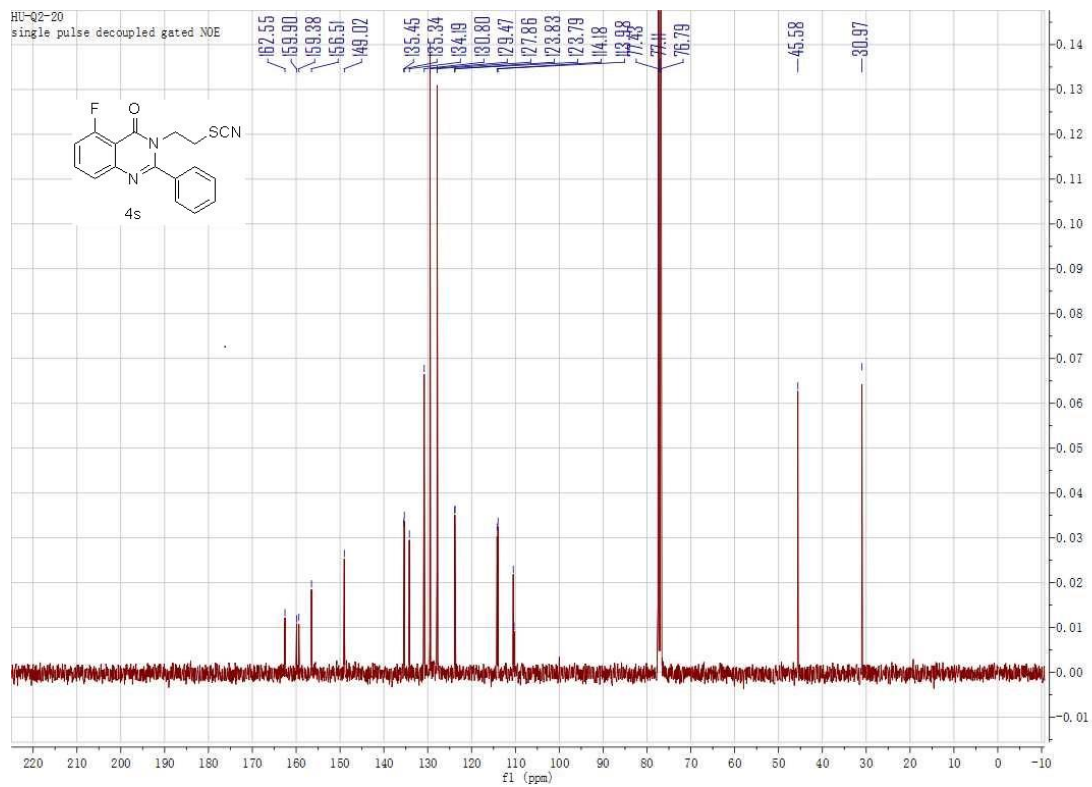

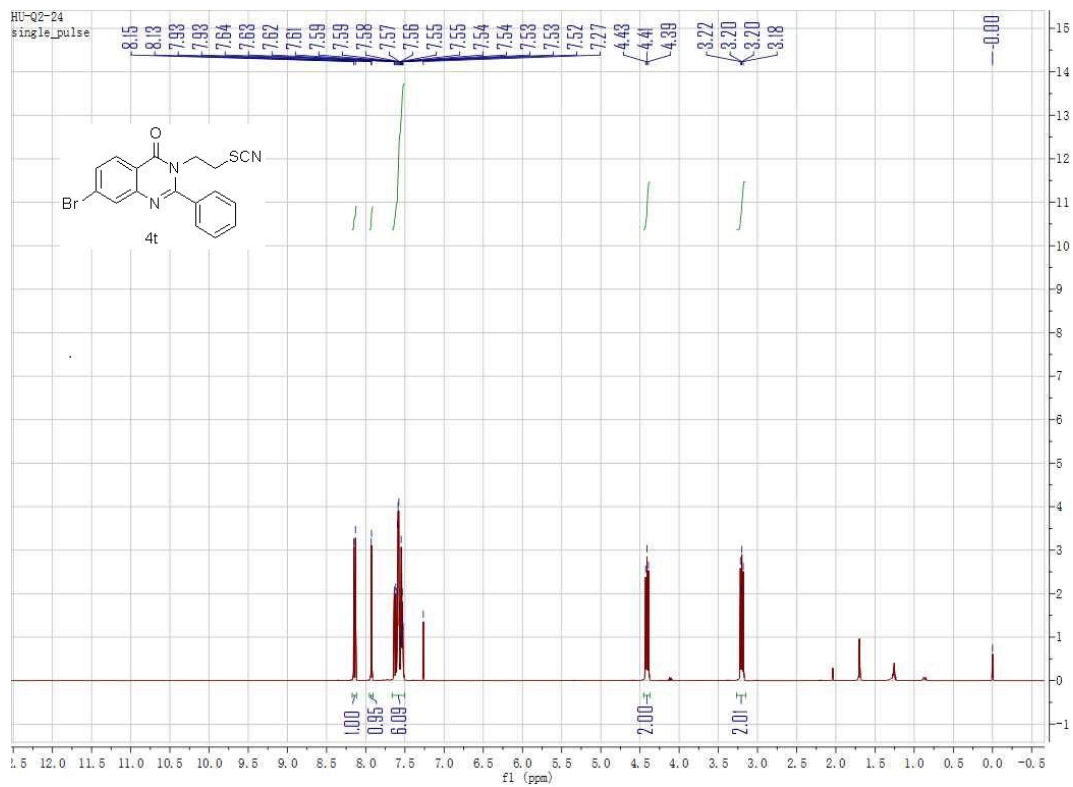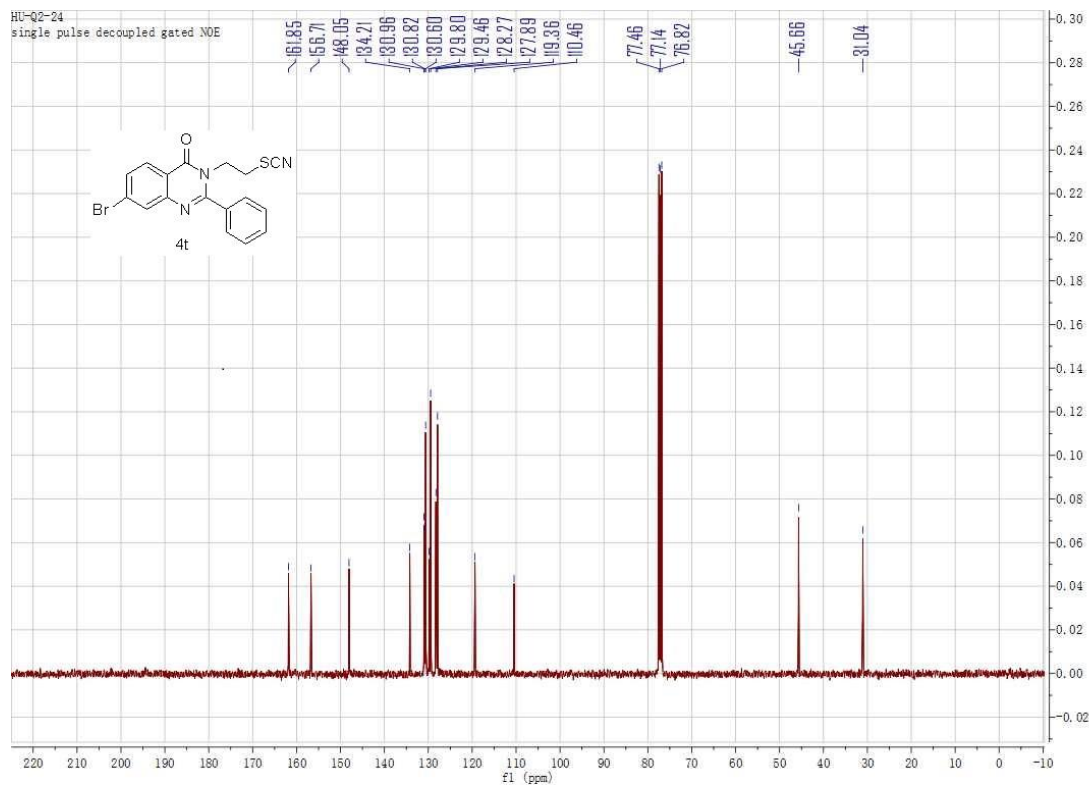

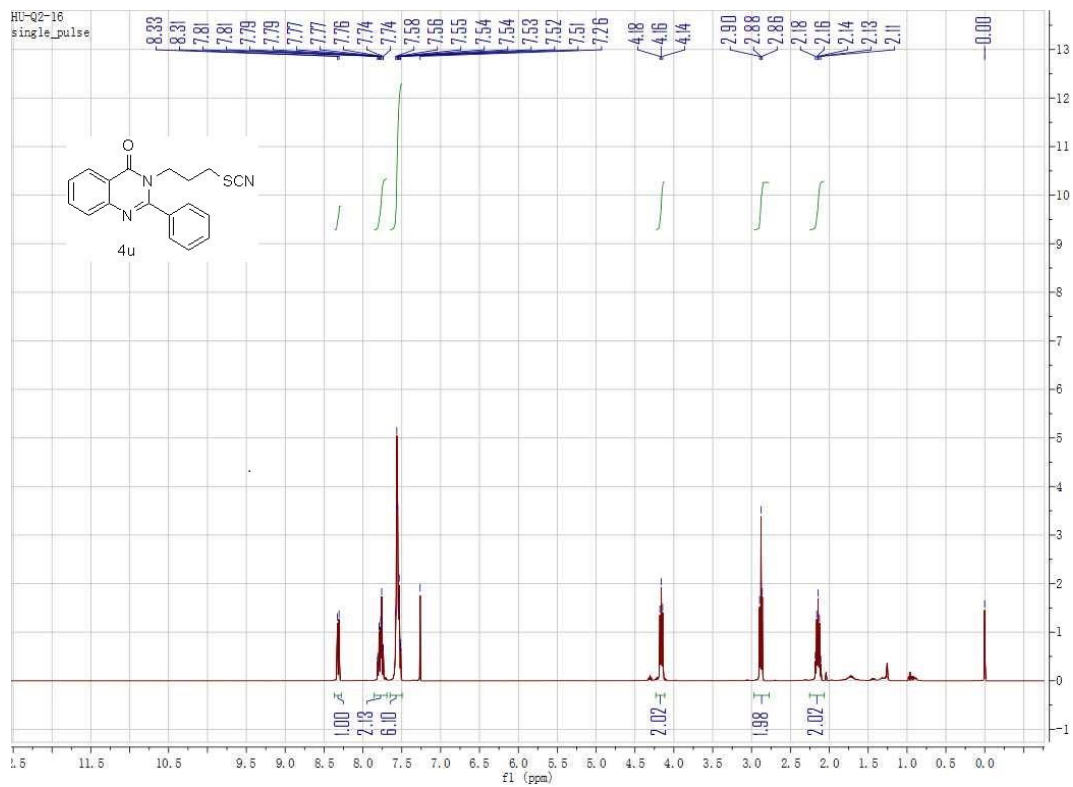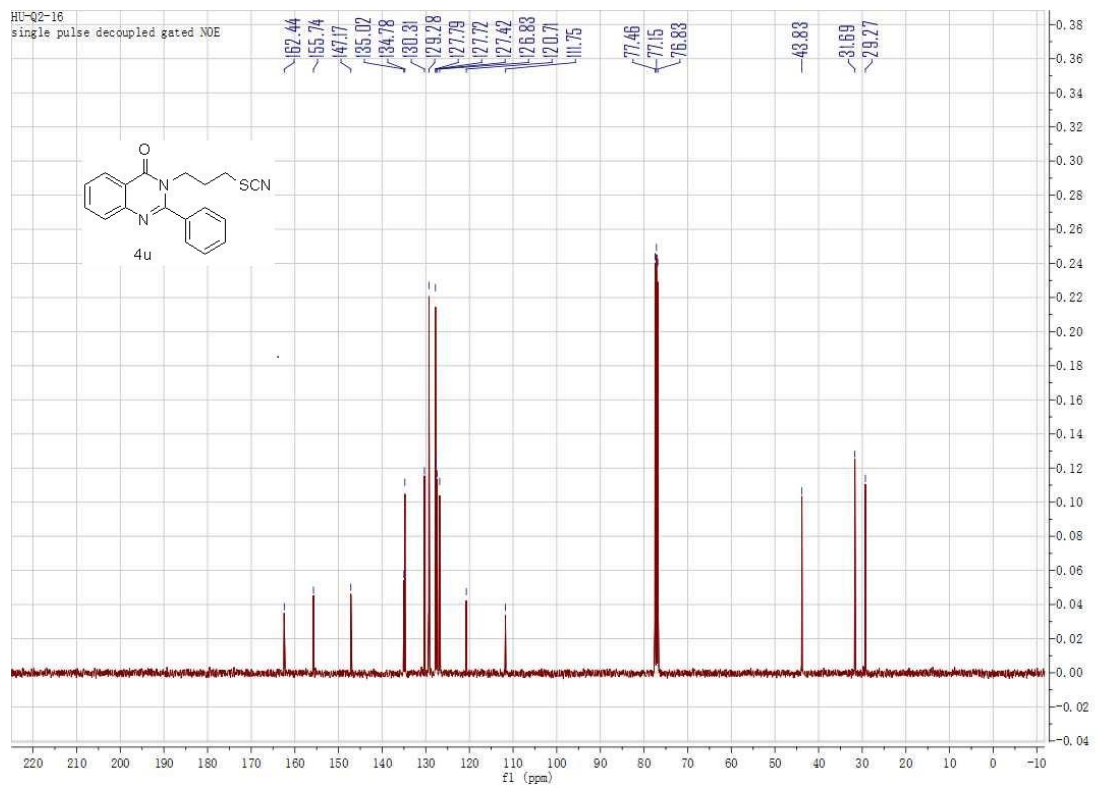

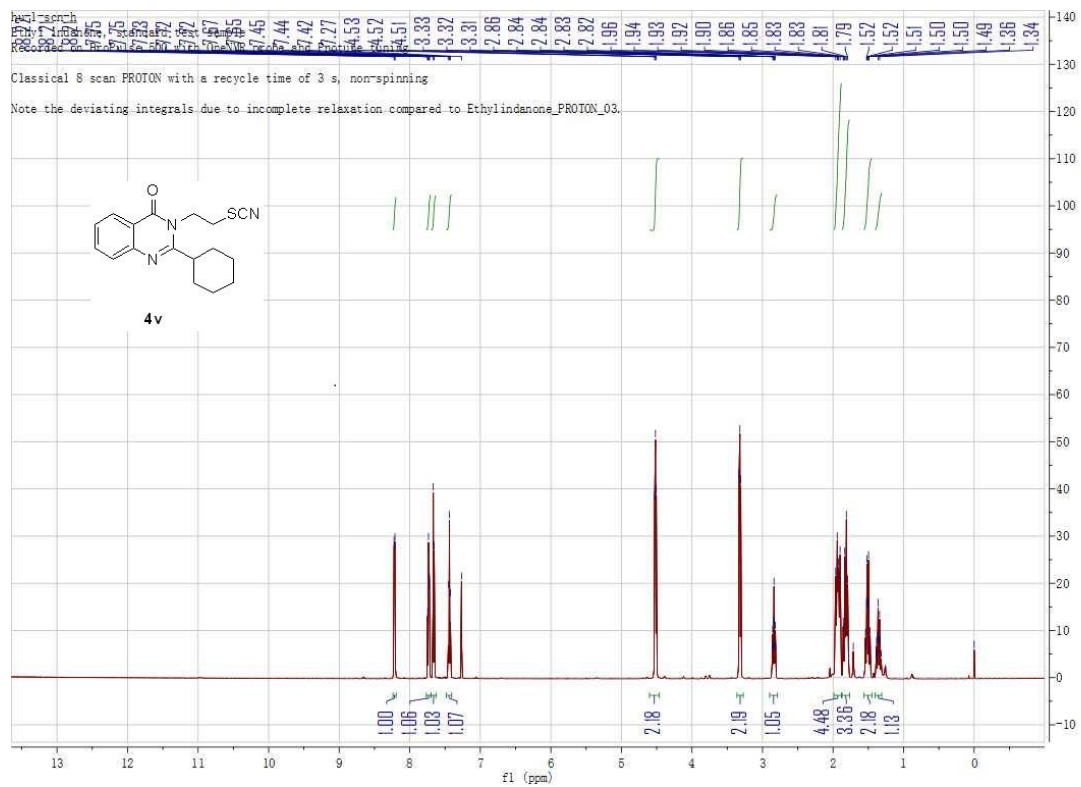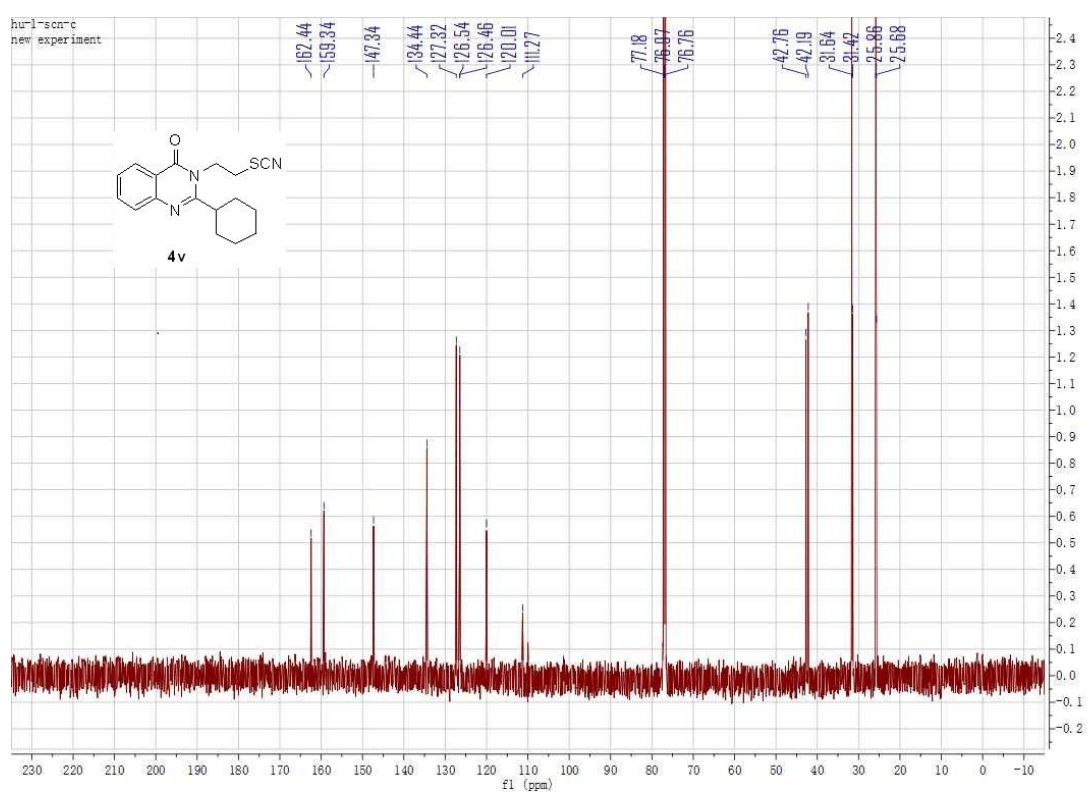

Supplement: d1nj01435h1.pdf [file d1nj01435h1.pdf]
